# Supplementary material
Source: publisher figshare collection journal article supplement (https://gsapubs.figshare.com/articles/dataset/_/21568818)
Supplement: Supplementary file 1 [file 1]

## Sheet: Notes
NOTES:
1. Analyses with >10% uncertainty (1-sigma) in 206Pb/238U age are not included.
2. Analyses with >10% uncertinty (1-sigma) in 206Pb/207Pb age are not included, unless 206Pb/238U age is < 400 Ma.
3. Best age is determined from 206Pb/238U age for analyses with 206Pb/238U age < 900 Ma and from 206Pb/207Pb age for analyses with 206Pb/238U age > 900 Ma.
4. Concordance is based on 206Pb/238U age vs 206Pb/207Pb age. Value is not reported for 206Pb/238U ages < 400 Ma because eof large uncertainty in 206Pb/207Pb age.
5. Analyses with 206Pb/238U age >400 Ma and with >20% discordance (<80% concordance) are not included.
6. Analyses with 206Pb/238U age >400 Ma and with >5% reverse discordance (<105% concordance) are not included.
7. All uncertainties for individual grain ages are reported at the 1-sigma level, and include only measurement errors.
8. Systematic errors (%, 2σ) for each sample/run are reported in the table below this list.
9. Analyses conducted by LA-ICPMS, as described by Gehrels et al. (2008) and Gehrels and Pecha (2014)
10. U concentration and U/Th are calibrated relative to FC-1 zircon standard and are accurate to ~20%.
11. Common Pb correction is from measured 204Pb with common Pb composition interpreted from Stacey and Kramers (1975).
12. Common Pb composition assigned uncertainties of 1.5 for 206Pb/204Pb, 0.3 for 207Pb/204Pb, and 2.0 for 208Pb/204Pb.
13. U/Pb and 206Pb/207Pb fractionation is calibrated relative to fragments of large Sri Lanka zircons and individual crystals of FC-1, and R33.
14. U decay constants and composition as follows: 238U = 9.8485 x 10-10, 235U = 1.55125 x 10-10, 238U/235U = 137.82.
REFERENCES:
Gehrels, G.E., Valencia, V., and Ruiz, J., 2008, Enhanced precision, accuracy, efficiency, and spatial resolution of U-Pb ages by laser ablation-multicollector-inductively coupled plasma-mass spectrometry: Geochemistry, Geophysics, Geosystems, v. 9, Q03017, https://doi.org/10.1029/2007GC001805.
Gehrels, G. and Pecha, M., 2014, Detrital zircon U-Pb geochronology and Hf isotope geochemistry of Paleozoic and Triassic passive margin strata of western North America: Geosphere, v. 10, no. 1, p. 49-65, https://doi.org/10.1130/GES00889.1.
Stacey, J.S. and Kramers, J.D., 1975, Approximation of terrestrial lead isotope evolution by a two-stage model: Earth and Planetary Science Letters, v. 26, p. 207-221, https://doi.org/10.1016/0012-821X(75)90088-6.
SYSTEMATIC ERRORS:
Sample_Metadata				External_Uncertainty (% 2σ)
Sample_Name	Formation	Latitude_WGS1984	Longitude_WGS1984	206/238	206/207
21TMS001	Amargosa Valley Formation, conglomerate member	36.3815	-116.489	0.830911	0.881489
21TMS009	Amargosa Valley Formation, conglomerate member	36.3811	-116.486	0.834325	0.791876
21TMS007	Amargosa Valley Formation, red sandstone member	36.3771	-116.484	0.84314	0.82731
21TMS010	Amargosa Valley Formation, red sandstone member	36.3755	-116.478	0.899926	0.788416
21TMS011	Bat Mountain Formation, conglomerate member	36.3757	-116.478	0.87172	0.81153

## Sheet: 2022_03_21_DeathValley_DZ_UPb
Table S2. New detrital zircon U-Pb data for sandstones of the Amargosa Valley and Bat Mountain Formations exposed on Bat Mountain in the southern Funeral Mountains, California.
			Isotope_Ratios									Apparent_Ages										Schwartz, T.M., Souders, A.K., Lundstern, J.E., Gilmer, A.K., and Thompson, R.A., 2022, Revised age and regional correlations of Cenozoic strata on Bat Mountain, Death Valley region, California (USA) from zircon U-Pb geochronology of sandstones and ash-fall tuffs: Geosphere, v. 19, https://doi.org/10.1130/GES02543.1.
Sample_Name	Spot	U_ppm	206Pb/204Pb	U/Th	206Pb*/207Pb*	err_pct_206*207*	207Pb*/235U*	err_pct_207*235*	206Pb*/238U	err_pct_206*238	err_corr	206Pb*/238U*	err_Ma_206238	207Pb*/235U	err_Ma_207235	206Pb*/207Pb*	err_Ma_206207	BestAge_Ma	err_Ma_BestAge	conc_pct
21TMS001	Spot 13	172.198	2704.68	0.95512	21.9917	2.17693	0.0225436	4.02448	0.00412797	2.35783	0.585872	26.5558	0.624853	22.6362	0.90091	NA	NA	26.5558	0.624853
21TMS001	Spot 150	885.528	10799.3	0.781331	21.075	1.43774	0.0267369	1.60192	0.00422808	0.63932	0.399096	27.1985	0.173519	26.7916	0.423567	NA	NA	27.1985	0.173519
21TMS001	Spot 186	275.071	4548.45	2.56085	20.3159	1.77176	0.0266219	2.59336	0.00423542	0.97636	0.376484	27.2456	0.265454	26.6779	0.682844	NA	NA	27.2456	0.265454
21TMS001	Spot 255	336.543	27989.3	1.67592	20.5315	1.59849	0.0277997	1.77631	0.00424242	0.757384	0.426381	27.2905	0.206257	27.8422	0.487843	75.6876	38.1943	27.2905	0.206257	36.0568
21TMS001	Spot 119	145.133	1304.35	2.39119	18.2484	3.17105	0.0252416	8.00114	0.00425499	1.22461	0.153055	27.3712	0.334481	25.3118	2.0002	NA	NA	27.3712	0.334481
21TMS001	Spot 221	253.885	9674.47	2.01761	19.3646	2.1978	0.0290974	2.43028	0.00426516	1.0353	0.426	27.4365	0.283447	29.1233	0.697726	170.553	51.3365	27.4365	0.283447	16.0868
21TMS001	Spot 286	380.758	5565.3	2.40651	21.0838	1.90438	0.0261086	2.27461	0.00427285	0.92601	0.407108	27.4859	0.25398	26.1701	0.58766	NA	NA	27.4859	0.25398
21TMS001	Spot 237	658.491	44361.9	1.25328	20.1715	1.32836	0.0287542	1.57002	0.00429052	0.836581	0.532847	27.5993	0.230397	28.7847	0.445579	128.896	31.2521	27.5993	0.230397	21.4121
21TMS001	Spot 105	386.205	5361.86	2.29472	21.0382	1.57708	0.0262743	2.26702	0.00429764	1.18224	0.521494	27.645	0.326129	26.334	0.589321	NA	NA	27.645	0.326129
21TMS001	Spot 93	155.237	2012.15	2.25202	20.1855	2.9139	0.0247359	3.89955	0.00429954	0.931512	0.238876	27.6572	0.257078	24.8108	0.955787	NA	NA	27.6572	0.257078
21TMS001	Spot 246	333.163	19326.1	2.12929	20.2742	1.95243	0.0284882	2.22863	0.00430736	1.04289	0.467951	27.7074	0.288338	28.5221	0.626808	97.7226	46.593	27.7074	0.288338	28.3531
21TMS001	Spot 270	239.468	3589.38	1.69962	21.118	2.12836	0.0253646	2.59973	0.00430858	0.904978	0.348105	27.7152	0.250278	25.4336	0.652992	NA	NA	27.7152	0.250278
21TMS001	Spot 131	403.95	5787.13	1.5459	20.6345	1.74377	0.0271362	2.11408	0.0043188	1.14678	0.54245	27.7808	0.3179	27.1864	0.567115	NA	NA	27.7808	0.3179
21TMS001	Spot 252	572.919	68880.6	1.29823	20.1663	1.36135	0.0290134	1.62634	0.00432087	0.88757	0.545746	27.7941	0.246161	29.0405	0.465607	133.398	32.0162	27.7941	0.246161	20.8354
21TMS001	Spot 28	355.26	5298.84	2.18185	21.3648	1.7182	0.0259649	2.28947	0.00432147	0.876836	0.382987	27.798	0.243218	26.0279	0.588327	NA	NA	27.798	0.243218
21TMS001	Spot 49	347.851	2863.88	2.28626	21.5148	2.07664	0.0244178	2.35622	0.00432423	1.07684	0.457018	27.8157	0.298884	24.4956	0.570265	NA	NA	27.8157	0.298884
21TMS001	Spot 204	231.501	2298.25	2.84822	20.5158	1.8848	0.0249879	2.19297	0.00432874	0.882791	0.402556	27.8446	0.245279	25.0604	0.54284	NA	NA	27.8446	0.245279
21TMS001	Spot 83	276.641	1961.58	2.15435	20.3843	1.93556	0.0244847	2.26155	0.0043295	1.08747	0.480851	27.8495	0.302202	24.5619	0.548816	NA	NA	27.8495	0.302202
21TMS001	Spot 189	247.111	2519.09	2.6687	21.8358	2.65019	0.0236553	3.81792	0.00433482	1.04372	0.273373	27.8836	0.290398	23.7395	0.895842	NA	NA	27.8836	0.290398
21TMS001	Spot 68	304.074	10224.8	2.17077	20.3858	2.0522	0.0281962	2.36659	0.00433594	0.961286	0.40619	27.8908	0.267532	28.2337	0.658973	57.4893	51.5819	27.8908	0.267532	48.5148
21TMS001	Spot 89	428.075	2488.27	1.75159	20.9654	1.54188	0.024664	1.78368	0.00433675	0.864752	0.484813	27.896	0.24071	24.7396	0.435942	NA	NA	27.896	0.24071
21TMS001	Spot 209	166.153	2439.06	1.72753	20.5986	2.39682	0.0250921	3.37545	0.00433959	1.12683	0.33383	27.9142	0.313866	25.1637	0.838952	NA	NA	27.9142	0.313866
21TMS001	Spot 42	156.49	3071.35	2.64993	19.7086	2.56101	0.0272529	3.38983	0.00433968	0.984147	0.290324	27.9148	0.274129	27.3018	0.913151	NA	NA	27.9148	0.274129
21TMS001	Spot 224	197.509	4138.95	2.46069	21.0266	2.02027	0.0260006	2.77327	0.0043401	0.990585	0.35719	27.9176	0.275949	26.0632	0.713606	NA	NA	27.9176	0.275949
21TMS001	Spot 191	283.809	53080.4	2.10002	21.3759	1.92354	0.0276074	2.20592	0.0043417	1.07978	0.489492	27.9278	0.300906	27.6521	0.601751	3.73593	NA	27.9278	0.300906	747.545
21TMS001	Spot 30	361.035	5150.56	2.25071	20.4353	1.56386	0.0273242	1.92126	0.00434394	0.946488	0.49264	27.9422	0.263897	27.3722	0.518866	NA	NA	27.9422	0.263897
21TMS001	Spot 169	411.978	3363.05	1.60551	20.9889	1.69653	0.0257155	2.24176	0.00434554	0.837564	0.373619	27.9524	0.233613	25.781	0.570673	NA	NA	27.9524	0.233613
21TMS001	Spot 48	324.672	5226.73	2.79004	21.5379	1.974	0.0259674	2.21151	0.00435461	0.970117	0.438668	28.0107	0.271147	26.0303	0.568347	NA	NA	28.0107	0.271147
21TMS001	Spot 60	300.008	10847.3	2.48731	20.817	2.3893	0.0277614	2.61311	0.00435552	0.886065	0.339085	28.0165	0.247706	27.8043	0.716699	9.51134	NA	28.0165	0.247706	294.559
21TMS001	Spot 263	333.228	1637.01	2.10701	21.2681	1.53712	0.0224776	1.86049	0.00435608	0.942605	0.506644	28.0201	0.263546	22.5707	0.415292	NA	NA	28.0201	0.263546
21TMS001	Spot 265	490.349	76489.5	1.32197	21.3564	1.72296	0.0276719	2.06073	0.00436009	1.13048	0.548581	28.0459	0.316364	27.7159	0.563426	-0.777393	NA	28.0459	0.316364	-3607.68
21TMS001	Spot 146	383.488	16019.7	1.84672	20.828	1.64244	0.0281888	1.85711	0.00436078	0.861466	0.463874	28.0503	0.241119	28.2264	0.516977	43.2214	39.3132	28.0503	0.241119	64.8991
21TMS001	Spot 32	480.189	34719.2	1.74736	21.4737	1.284	0.0275344	1.6464	0.00436966	1.02887	0.624924	28.1073	0.288559	27.58	0.447965	NA	NA	28.1073	0.288559
21TMS001	Spot 11	217.595	1912.24	2.80651	20.9213	2.20888	0.0239024	6.02282	0.00437219	1.27872	0.212312	28.1235	0.358837	23.9846	1.42762	NA	NA	28.1235	0.358837
21TMS001	Spot 129	337.812	2384.44	1.93979	22.071	2.31479	0.0233796	2.58401	0.00437452	1.00531	0.389052	28.1384	0.282263	23.4659	0.599409	NA	NA	28.1384	0.282263
21TMS001	Spot 245	227.198	3138.65	2.32259	21.5387	2.10328	0.0248411	2.75708	0.00437525	0.966978	0.350725	28.1431	0.271545	24.915	0.678569	NA	NA	28.1431	0.271545
21TMS001	Spot 51	672.317	5460.67	1.64321	21.6917	1.13813	0.0260102	1.46432	0.00438526	0.779627	0.532416	28.2074	0.219432	26.0727	0.376927	NA	NA	28.2074	0.219432
21TMS001	Spot 122	270.111	3063.13	3.16772	21.159	1.72249	0.0254189	2.22355	0.00438908	1.0625	0.477841	28.2319	0.299309	25.4874	0.559671	NA	NA	28.2319	0.299309
21TMS001	Spot 45	302.82	20498.8	2.57712	20.5845	2.16714	0.0287325	2.37417	0.00438948	0.949432	0.399901	28.2345	0.267481	28.7632	0.673307	73.1396	51.7255	28.2345	0.267481	38.6036
21TMS001	Spot 199	258.933	22832.1	2.69208	21.0488	1.96638	0.0280785	2.21083	0.00439007	1.00773	0.455812	28.2383	0.283942	28.1175	0.613103	17.784	NA	28.2383	0.283942	158.785
21TMS001	Spot 180	340.689	46856.4	1.45767	21.0269	1.16624	0.0283837	1.55519	0.00439131	1.02839	0.661263	28.2463	0.289845	28.4189	0.435839	43.0204	27.8959	28.2463	0.289845	65.6579
21TMS001	Spot 117	251.225	5903.09	1.99344	20.5363	1.68518	0.0277294	2.50279	0.00439224	0.963566	0.384997	28.2522	0.271633	27.7727	0.685672	NA	NA	28.2522	0.271633
21TMS001	Spot 47	136.884	4309.04	1.63051	19.6006	2.93485	0.0286088	4.80117	0.00439419	1.18708	0.247248	28.2647	0.33479	28.6411	1.3559	60.3339	NA	28.2647	0.33479	46.8471
21TMS001	Spot 24	353.7	142433	1.65201	21.0531	1.88631	0.0284517	2.13314	0.00439548	0.996046	0.466939	28.273	0.280995	28.486	0.599202	46.5149	45.0756	28.273	0.280995	60.7825
21TMS001	Spot 175	330.786	20536.1	2.10142	21.2944	1.71658	0.0278226	2.06097	0.00439712	1.12716	0.546907	28.2835	0.318101	27.8647	0.566474	NA	NA	28.2835	0.318101
21TMS001	Spot 231	381.16	3859.27	1.7993	17.9157	2.18462	0.0311529	2.32677	0.00439756	0.791342	0.340103	28.2863	0.223351	31.1494	0.713771	257.863	50.3089	28.2863	0.223351	10.9695
21TMS001	Spot 193	405.866	5291.68	1.65879	20.8444	1.6348	0.027166	1.95563	0.00439792	0.930152	0.475629	28.2886	0.262551	27.2159	0.525171	NA	NA	28.2886	0.262551
21TMS001	Spot 174	237.681	13725.2	2.61875	20.5279	1.80122	0.0286953	2.159	0.00440196	1.18928	0.550848	28.3146	0.336002	28.7265	0.611514	63.3338	42.9138	28.3146	0.336002	44.7069
21TMS001	Spot 125	206.918	6951.73	2.21811	21.5257	2.34627	0.0266801	2.91999	0.00440428	1.17083	0.400971	28.3294	0.330962	26.7354	0.770483	NA	NA	28.3294	0.330962
21TMS001	Spot 250	286.252	61978.1	2.50817	20.2458	2.2407	0.0294624	2.60842	0.00440726	1.33531	0.511926	28.3486	0.377712	29.4834	0.757992	122.932	52.7709	28.3486	0.377712	23.0603
21TMS001	Spot 6	288.698	11622.6	1.84936	20.0614	1.52382	0.0292758	1.78861	0.00441317	0.879723	0.491847	28.3865	0.249174	29.2993	0.516563	104.778	36.8047	28.3865	0.249174	27.0919
21TMS001	Spot 304	206.853	13994	1.05522	19.8325	1.82395	0.0297682	2.19334	0.00441349	1.19692	0.545704	28.3886	0.339041	29.785	0.643798	143.903	43.1203	28.3886	0.339041	19.7276
21TMS001	Spot 220	681.27	24998.2	1.40711	20.4223	1.64125	0.0290639	1.73729	0.00441372	0.565334	0.325413	28.3901	0.160146	29.0902	0.49821	87.3248	38.9764	28.3901	0.160146	32.5109
21TMS001	Spot 15	177.473	11578.1	1.1952	21.198	2.54803	0.0276628	2.68361	0.00441468	0.830953	0.30964	28.3962	0.23544	27.7069	0.733493	NA	NA	28.3962	0.23544
21TMS001	Spot 257	346.586	5467.24	1.81012	20.626	1.53539	0.0274858	1.87702	0.00441479	1.0415	0.554871	28.3969	0.295104	27.5319	0.509837	NA	NA	28.3969	0.295104
21TMS001	Spot 212	320.677	18881.9	2.41121	21.059	1.69104	0.0280978	1.93427	0.00441705	0.935929	0.483866	28.4114	0.265326	28.1366	0.536767	4.72182	NA	28.4114	0.265326	601.705
21TMS001	Spot 53	289.7	29946.2	2.14441	21.1915	1.98796	0.0282195	2.29106	0.00442144	1.13209	0.494132	28.4396	0.321252	28.2567	0.638453	12.7555	NA	28.4396	0.321252	222.96
21TMS001	Spot 240	276.452	6923.44	1.38015	20.5833	1.96366	0.0279802	3.20007	0.00442365	1.03891	0.324652	28.4538	0.294958	28.0204	0.884413	NA	NA	28.4538	0.294958
21TMS001	Spot 136	373.721	3573.78	1.44708	20.4251	1.38148	0.027147	1.89353	0.00442376	0.917444	0.484514	28.4545	0.260479	27.1971	0.508151	NA	NA	28.4545	0.260479
21TMS001	Spot 88	74.8962	1957.54	2.2133	20.1131	2.62391	0.0254024	3.18671	0.0044238	1.38604	0.434943	28.4547	0.393524	25.471	0.801591	NA	NA	28.4547	0.393524
21TMS001	Spot 2	243.234	11036.8	3.25054	21.1794	2.62675	0.0277074	2.76678	0.00442577	0.865722	0.312899	28.4674	0.245905	27.7509	0.757408	NA	NA	28.4674	0.245905
21TMS001	Spot 126	334.746	3126.35	1.66904	17.9073	2.4217	0.0309432	2.63758	0.0044271	0.910642	0.345256	28.4759	0.258742	30.9429	0.803834	226.889	57.2212	28.4759	0.258742	12.5506
21TMS001	Spot 201	362.804	11308	1.76943	21.4258	2.04603	0.0274149	2.38077	0.00442972	1.05	0.441034	28.4927	0.298514	27.4618	0.645041	NA	NA	28.4927	0.298514
21TMS001	Spot 111	358.208	4378.61	1.80676	20.5025	1.71123	0.0274659	2.12878	0.00442981	1.14451	0.537637	28.4933	0.32539	27.5123	0.577814	NA	NA	28.4933	0.32539
21TMS001	Spot 130	220.867	4001.87	2.01499	19.8622	2.56695	0.028301	2.8616	0.0044321	0.941312	0.328946	28.508	0.267757	28.3372	0.799688	13.8813	NA	28.508	0.267757	205.37
21TMS001	Spot 192	188.974	2659.3	1.88552	18.7987	2.90456	0.0288802	6.63181	0.00443339	1.14922	0.173288	28.5163	0.32699	28.909	1.89016	61.6664	NA	28.5163	0.32699	46.2429
21TMS001	Spot 57	231.34	8374.1	2.55693	20.0955	1.78223	0.0290915	2.01055	0.00443432	0.926227	0.460683	28.5222	0.263597	29.1175	0.577107	78.486	42.3975	28.5222	0.263597	36.3406
21TMS001	Spot 12	200.264	1231.46	3.19152	21.0277	2.30154	0.0214511	2.51967	0.00443663	0.886503	0.351833	28.5371	0.252423	21.5507	0.537285	NA	NA	28.5371	0.252423
21TMS001	Spot 56	139.618	6373.09	1.98351	20.8678	2.68442	0.0276656	3.00403	0.00443915	0.914462	0.304412	28.5532	0.260531	27.7096	0.821148	NA	NA	28.5532	0.260531
21TMS001	Spot 40	384.572	8950.85	1.81563	21.0193	1.37926	0.0278842	1.62099	0.00444001	0.843141	0.520141	28.5588	0.240258	27.9256	0.446503	NA	NA	28.5588	0.240258
21TMS001	Spot 264	131.482	1592.91	2.34183	20.9453	2.95061	0.0232073	3.58628	0.0044415	1.06869	0.297993	28.5684	0.304631	23.295	0.825914	NA	NA	28.5684	0.304631
21TMS001	Spot 293	231.52	12930.3	1.85555	21.2462	2.07286	0.0278548	2.35562	0.00444162	1.09445	0.464614	28.5691	0.311984	27.8966	0.648193	NA	NA	28.5691	0.311984
21TMS001	Spot 203	377.039	5863.77	1.75906	21.3639	1.70557	0.0268697	3.31371	0.00444795	1.12234	0.338698	28.6098	0.320389	26.9229	0.880422	NA	NA	28.6098	0.320389
21TMS001	Spot 128	710.875	61647.6	1.85217	21.8753	1.20891	0.0276648	1.39963	0.00444842	0.705094	0.503772	28.6128	0.2013	27.7089	0.382578	NA	NA	28.6128	0.2013
21TMS001	Spot 134	264.261	10756.4	2.283	20.4124	1.92948	0.0290208	2.18434	0.00445051	0.907151	0.415297	28.6262	0.259107	29.0478	0.625514	64.056	47.3451	28.6262	0.259107	44.6893
21TMS001	Spot 90	264.916	5021.67	2.18692	20.8361	2.11664	0.027353	2.4879	0.00445446	1.18684	0.477045	28.6516	0.339293	27.4007	0.672586	NA	NA	28.6516	0.339293
21TMS001	Spot 8	466.652	12547.5	1.86318	21.4346	1.3379	0.0276616	1.94832	0.00445451	1.01049	0.518649	28.6518	0.288883	27.7057	0.532496	NA	NA	28.6518	0.288883
21TMS001	Spot 313	241.141	6958.46	2.36382	21.0559	1.88768	0.0276355	2.16443	0.00445904	1.02426	0.473222	28.6809	0.293114	27.6799	0.591021	NA	NA	28.6809	0.293114
21TMS001	Spot 218	159.861	7304.37	1.91763	21.5717	2.95024	0.0269241	3.05881	0.00446084	0.794351	0.259693	28.6925	0.227413	26.9767	0.8143	NA	NA	28.6925	0.227413
21TMS001	Spot 70	202.422	9893.03	1.53068	20.8086	2.52018	0.0284265	2.78581	0.00446966	1.16559	0.418403	28.7491	0.334351	28.4611	0.781864	4.23859	NA	28.7491	0.334351	678.27
21TMS001	Spot 217	492.212	113261	3.00052	22.0294	1.83134	0.0275623	1.96012	0.00447049	0.698757	0.356486	28.7544	0.200476	27.6076	0.533851	NA	NA	28.7544	0.200476
21TMS001	Spot 33	229.208	12816.7	1.51869	21.5668	2.65655	0.0276338	2.82368	0.0044738	0.953759	0.337771	28.7756	0.273839	27.6782	0.770989	NA	NA	28.7756	0.273839
21TMS001	Spot 39	182.339	10159.2	1.89005	21.2748	2.36817	0.0278565	2.74262	0.00447578	1.35487	0.494004	28.7883	0.389174	27.8983	0.754727	NA	NA	28.7883	0.389174
21TMS001	Spot 219	231.26	1648.24	1.5	21.4116	2.69729	0.0229277	3.02446	0.00447637	1.19492	0.395086	28.7921	0.343277	23.0175	0.688326	NA	NA	28.7921	0.343277
21TMS001	Spot 207	99.3025	11435.3	2.2291	20.4201	3.80402	0.029137	3.98862	0.00447742	1.19266	0.299015	28.7989	0.342707	29.1624	1.14663	59.2343	NA	28.7989	0.342707	48.6186
21TMS001	Spot 234	130.638	2895.32	1.98322	20.7214	2.60129	0.0262876	2.94173	0.00447853	1.06608	0.362398	28.806	0.306409	26.3472	0.765095	NA	NA	28.806	0.306409
21TMS001	Spot 148	283.135	4767.24	2.10058	21.5374	1.58311	0.0266372	4.11279	0.0044798	1.19389	0.290286	28.8142	0.34324	26.693	1.08352	NA	NA	28.8142	0.34324
21TMS001	Spot 120	466.091	3002.21	1.14662	21.0485	1.65771	0.026057	2.08235	0.00448082	0.966589	0.464182	28.8207	0.277956	26.119	0.536953	NA	NA	28.8207	0.277956
21TMS001	Spot 1	282.697	5722.91	1.05622	21.2223	2.09476	0.0272295	2.38343	0.00448086	0.930717	0.390494	28.8209	0.267643	27.2787	0.641514	NA	NA	28.8209	0.267643
21TMS001	Spot 114	233.293	4363.69	1.86114	20.4907	2.28593	0.027826	4.47636	0.00448478	0.883734	0.197423	28.8461	0.254353	27.8681	1.23051	NA	NA	28.8461	0.254353
21TMS001	Spot 276	368.197	11964.3	1.9117	21.5312	1.9257	0.0276098	2.45602	0.00448575	1.1803	0.480576	28.8523	0.339784	27.6545	0.670034	NA	NA	28.8523	0.339784
21TMS001	Spot 61	171.542	2745.96	2.05324	21.4315	2.46436	0.025254	3.01706	0.00448599	1.38432	0.458831	28.8539	0.398538	25.324	0.754594	NA	NA	28.8539	0.398538
21TMS001	Spot 100	195.023	12317.4	2.09179	21.3159	2.08464	0.0279865	2.27922	0.00448668	0.92075	0.403977	28.8583	0.265119	28.0266	0.630052	NA	NA	28.8583	0.265119
21TMS001	Spot 141	204.781	3439.96	1.75278	17.4221	4.16962	0.032717	4.39462	0.00448891	1.05368	0.239766	28.8726	0.303545	32.6885	1.41366	322.834	96.9222	28.8726	0.303545	8.94349
21TMS001	Spot 46	199.415	2093.86	2.27758	21.1681	2.78268	0.0246389	5.05816	0.00448918	1.195	0.236251	28.8743	0.344276	24.7147	1.23502	NA	NA	28.8743	0.344276
21TMS001	Spot 294	340.901	12445	1.74986	21.6181	1.48268	0.027637	1.81069	0.00449054	1.00665	0.555952	28.8831	0.290102	27.6813	0.494452	NA	NA	28.8831	0.290102
21TMS001	Spot 243	270.522	2543.73	2.55127	20.5002	1.6597	0.026304	2.05311	0.00449522	1.11876	0.544912	28.9131	0.322745	26.3634	0.534303	NA	NA	28.9131	0.322745
21TMS001	Spot 300	144.272	1408.34	1.704	20.2577	2.75916	0.0238075	3.54099	0.00449615	1.15496	0.326167	28.9191	0.333254	23.8905	0.836085	NA	NA	28.9191	0.333254
21TMS001	Spot 158	454.484	21951.2	1.87587	21.4297	1.32112	0.0283692	1.71352	0.00449832	1.08736	0.634573	28.933	0.3139	28.4046	0.479974	NA	NA	28.933	0.3139
21TMS001	Spot 291	144.391	6786.6	2.441	20.7703	2.62334	0.0282398	2.75888	0.00449887	0.84521	0.30636	28.9365	0.244027	28.2768	0.76936	NA	NA	28.9365	0.244027
21TMS001	Spot 95	150.616	4282.36	1.68474	20.9581	2.37208	0.027185	2.7913	0.00450081	1.28305	0.45966	28.949	0.370597	27.2346	0.750096	NA	NA	28.949	0.370597
21TMS001	Spot 64	169.024	3383.01	1.7524	19.2052	2.50605	0.0293252	2.72056	0.00450381	1.01308	0.372381	28.9682	0.292814	29.3481	0.787003	60.5756	60.1749	28.9682	0.292814	47.8217
21TMS001	Spot 127	170.481	2196.23	1.6905	20.4528	2.53728	0.0259253	2.7175	0.00450398	0.861021	0.316843	28.9693	0.248872	25.9887	0.697282	NA	NA	28.9693	0.248872
21TMS001	Spot 41	196.947	4682.46	3.25029	21.7145	2.65611	0.0264202	3.03038	0.00450544	1.35842	0.448267	28.9787	0.392769	26.4784	0.792025	NA	NA	28.9787	0.392769
21TMS001	Spot 34	238.481	3345.84	1.55424	20.4643	2.26004	0.0273709	5.13705	0.00450887	2.02691	0.394567	29.0007	0.586499	27.4184	1.38965	NA	NA	29.0007	0.586499
21TMS001	Spot 43	174.917	2860.44	2.19153	21.2513	2.52261	0.0258467	2.74154	0.00451553	0.901095	0.328682	29.0434	0.26112	25.9109	0.701372	NA	NA	29.0434	0.26112
21TMS001	Spot 86	146.128	8931.34	2.04323	20.2077	3.50629	0.0295794	3.73719	0.00453476	0.969203	0.25934	29.1668	0.282047	29.5988	1.0902	64.8014	NA	29.1668	0.282047	45.0096
21TMS001	Spot 184	184.756	33886.6	1.79785	20.9475	2.08406	0.0293822	2.26181	0.00453931	0.878835	0.388554	29.1961	0.256005	29.4043	0.655532	46.4418	NA	29.1961	0.256005	62.8659
21TMS001	Spot 157	203.109	4138.87	2.13038	21.1467	2.75688	0.0272254	5.05257	0.00454123	1.0065	0.199206	29.2084	0.293318	27.2746	1.35972	NA	NA	29.2084	0.293318
21TMS001	Spot 59	165.865	2482.47	2.06583	20.4438	2.65318	0.0266774	6.18987	0.0045506	1.14836	0.185522	29.2685	0.335345	26.7327	1.63313	NA	NA	29.2685	0.335345
21TMS001	Spot 21	207.422	4075.01	1.94768	21.0551	1.87383	0.0273377	2.2017	0.0045646	1.08877	0.49451	29.3584	0.318917	27.3856	0.594892	NA	NA	29.3584	0.318917
21TMS001	Spot 296	237.818	3290.28	1.47268	21.4005	2.68936	0.0263679	3.60555	0.00457219	1.22423	0.33954	29.4071	0.35919	26.4266	0.940533	NA	NA	29.4071	0.35919
21TMS001	Spot 179	137.868	63212.7	3.20724	21.6387	2.8357	0.0288266	3.08979	0.00458237	1.22702	0.397121	29.4724	0.360806	28.8561	0.879043	NA	NA	29.4724	0.360806
21TMS001	Spot 292	319.093	24680.7	2.07972	18.8104	3.30363	0.0329437	3.46748	0.00458904	1.04823	0.302302	29.5152	0.308679	32.9113	1.1229	288.265	75.5347	29.5152	0.308679	10.2389
21TMS001	Spot 112	196.522	3053.58	2.09882	21.2812	2.60832	0.0264206	5.06366	0.00459245	0.989374	0.195387	29.5371	0.291564	26.4788	1.32347	NA	NA	29.5371	0.291564
21TMS001	Spot 183	135.011	2278.6	1.85799	14.0961	4.90259	0.0406139	5.58856	0.00459529	0.888958	0.159067	29.5553	0.262133	40.4232	2.2147	744.922	116.717	29.5553	0.262133	3.96757
21TMS001	Spot 253	140.986	1980.93	1.48586	20.9198	3.053	0.0251972	3.48575	0.00460026	1.43405	0.411404	29.5872	0.423322	25.2678	0.869902	NA	NA	29.5872	0.423322
21TMS001	Spot 244	180.125	1399.1	1.66463	13.3143	7.33958	0.0406506	8.25465	0.00460479	1.04126	0.126142	29.6163	0.307675	40.4591	3.2741	742.467	173.45	29.6163	0.307675	3.9889
21TMS001	Spot 18	217.038	77564.7	1.35257	21.3419	1.95002	0.0294436	2.25616	0.00462135	1.13473	0.502949	29.7225	0.336495	29.4648	0.655222	8.4792	NA	29.7225	0.336495	350.534
21TMS001	Spot 295	156.91	2336.58	0.822554	21.0305	2.39031	0.0260662	8.23361	0.00463306	1.30581	0.158595	29.7977	0.388202	26.1281	2.12384	NA	NA	29.7977	0.388202
21TMS001	Spot 55	196.888	3214.54	2.03967	21.8427	2.27318	0.0260938	2.62591	0.0046394	1.25345	0.477337	29.8383	0.373143	26.1555	0.678049	NA	NA	29.8383	0.373143
21TMS001	Spot 215	93.7147	1876.45	1.57065	8.75096	14.5989	0.0677461	14.7261	0.00464847	1.85287	0.125822	29.8965	0.55266	66.5583	9.48737	1726.5	269.706	29.8965	0.55266	1.73163
21TMS001	Spot 84	194.73	2691.61	1.89187	20.2569	2.64165	0.027836	3.86442	0.00465453	1.27913	0.331002	29.9354	0.382025	27.878	1.06267	NA	NA	29.9354	0.382025
21TMS001	Spot 306	268.278	4116.07	1.88055	21.708	2.01865	0.0271379	2.7849	0.00468128	0.776678	0.278889	30.1071	0.23329	27.188	0.747113	NA	NA	30.1071	0.23329
21TMS001	Spot 273	208.945	2650.56	1.89073	19.3331	2.55714	0.0294305	2.92662	0.00468238	1.00238	0.342503	30.1141	0.301153	29.4519	0.849566	NA	NA	30.1141	0.301153
21TMS001	Spot 101	155.128	8248.72	1.81446	15.4721	6.17514	0.0403375	6.27595	0.00469751	1.11721	0.178015	30.2112	0.336734	40.1536	2.47085	683.718	132	30.2112	0.336734	4.41867
21TMS001	Spot 233	156.392	1229.35	1.6322	12.7868	9.87447	0.0425947	11.906	0.00470635	1.13344	0.0951991	30.2679	0.342264	42.3541	4.939	794.903	249.345	30.2679	0.342264	3.80774
21TMS001	Spot 118	96.9225	2342.56	2.15186	15.7249	5.75396	0.0369983	6.28698	0.00471843	1.36444	0.217026	30.3454	0.41307	36.8892	2.2776	486.519	135.557	30.3454	0.41307	6.23725
21TMS001	Spot 239	137.762	6144.53	2.84161	20.9167	3.20922	0.0293311	3.3529	0.00474512	0.952614	0.284116	30.5167	0.290019	29.3539	0.970118	NA	NA	30.5167	0.290019
21TMS001	Spot 63	464.612	22059.4	1.38874	20.8559	1.75994	0.0312944	1.93716	0.00484947	0.804092	0.415087	31.1861	0.250159	31.2887	0.596871	39.1966	NA	31.1861	0.250159	79.5632
21TMS001	Spot 288	295.482	4745.46	2.63414	20.3914	1.38994	0.0306151	1.88438	0.00488435	1.20685	0.64045	31.4099	0.378148	30.6197	0.568378	NA	NA	31.4099	0.378148
21TMS001	Spot 16	99.9387	5611.28	2.1271	12.3577	3.96294	0.0531513	4.38534	0.00496612	0.956127	0.218028	31.9344	0.304579	52.5835	2.24728	1137.25	85.1659	31.9344	0.304579	2.80805
21TMS001	Spot 31	260.919	36153.8	2.26561	20.9369	1.86089	0.0371983	2.08012	0.00575228	0.928185	0.446217	36.9754	0.342217	37.085	0.757495	44.1963	44.5013	36.9754	0.342217	83.6616
21TMS001	Spot 75	221.827	5112.65	2.31651	8.79047	9.51844	0.0916153	9.82253	0.00603581	2.27614	0.231726	38.7924	0.880317	89.007	8.37069	1800.8	174.234	38.7924	0.880317	2.15417
21TMS001	Spot 260	512.181	8684.64	2.03346	20.4353	0.977738	0.0872829	1.36747	0.0135728	0.951928	0.696122	86.9075	0.821745	84.9691	1.11464	30.8309	23.5241	86.9075	0.821745	281.885
21TMS001	Spot 258	49.5874	273758	1.903	21.6593	2.28533	0.0863248	2.5278	0.0137622	1.0803	0.427366	88.1121	0.945396	84.0739	2.03962	NA	NA	88.1121	0.945396
21TMS001	Spot 275	323.844	63519	2.86351	19.9192	0.925624	0.0954253	1.24978	0.0140252	0.839449	0.67168	89.7843	0.74847	92.5447	1.10546	164.28	21.6426	89.7843	0.74847	54.6532
21TMS001	Spot 77	75.03	9240.43	1.54532	15.0626	5.87989	0.126284	5.9462	0.0142694	0.839458	0.141176	91.3362	0.761323	120.753	6.76982	747.76	124.496	91.3362	0.761323	12.2146
21TMS001	Spot 96	101.771	2637.43	1.44427	20.3818	1.95288	0.0886443	2.09813	0.0149428	0.722888	0.34454	95.6147	0.686086	86.2397	1.73471	NA	NA	95.6147	0.686086
21TMS001	Spot 76	65.9407	5435.2	1.986	11.8899	3.94334	0.16826	4.40124	0.0151182	1.28864	0.292789	96.729	1.23718	157.908	6.43656	1214.62	82.8231	96.729	1.23718	7.96374
21TMS001	Spot 289	267.072	18150	3.71969	20.0209	1.12506	0.102977	1.40747	0.015354	0.830695	0.590202	98.226	0.809773	99.5207	1.33427	130.647	26.7229	98.226	0.809773	75.1841
21TMS001	Spot 25	111.761	40047.2	1.51524	20.8415	1.43217	0.149389	1.78105	0.0229798	1.05775	0.593891	146.461	1.53173	141.373	2.3505	56.7838	34.193	146.461	1.53173	257.928
21TMS001	Spot 298	122.843	79225.1	1.50063	19.9876	1.23021	0.159405	1.46845	0.0234056	0.801566	0.545858	149.143	1.18176	150.182	2.05001	166.59	28.7702	149.143	1.18176	89.5269
21TMS001	Spot 178	84.9823	5495.01	1.99664	19.9977	1.23364	0.152201	3.20244	0.0235047	0.811295	0.253336	149.768	1.20105	143.853	4.29539	47.3623	NA	149.768	1.20105	316.217
21TMS001	Spot 81	38.3378	2422.96	1.44141	20.1303	2.1947	0.145678	4.27427	0.0245252	1.06177	0.24841	156.192	1.63847	138.089	5.51858	NA	NA	156.192	1.63847
21TMS001	Spot 113	463.374	28571.2	1.14098	20.1467	0.841315	0.165338	1.13867	0.0246426	0.76406	0.671013	156.93	1.18457	155.365	1.64039	131.551	19.8625	156.93	1.18457	119.292
21TMS001	Spot 190	85.4403	267915	1.1324	20.0015	1.3162	0.169089	1.45375	0.0247611	0.617244	0.424588	157.676	0.961438	158.628	2.13495	172.848	30.7193	157.676	0.961438	91.222
21TMS001	Spot 162	93.0191	9413.95	1.4694	19.7523	1.37575	0.167046	1.68572	0.0248445	0.68607	0.40699	158.201	1.07216	156.852	2.44999	136.506	36.1715	158.201	1.07216	115.893
21TMS001	Spot 137	263.128	33556.6	1.74077	20.0025	0.85676	0.169846	1.24878	0.0250278	0.892804	0.71494	159.353	1.40527	159.285	1.84096	158.29	20.413	159.353	1.40527	100.672
21TMS001	Spot 164	73.9624	4965.08	1.6757	20.4389	1.48412	0.157661	2.20048	0.0250541	0.74544	0.338763	159.519	1.17453	148.654	3.04293	NA	NA	159.519	1.17453
21TMS001	Spot 50	62.809	3875.66	1.53901	20.239	1.34289	0.156824	1.81417	0.0251443	0.969923	0.534638	160.086	1.53359	147.919	2.4972	NA	NA	160.086	1.53359
21TMS001	Spot 280	213.641	27477.8	2.21857	20.2267	0.853644	0.168165	1.26366	0.0252368	0.925823	0.732652	160.668	1.46912	157.825	1.84711	115.384	20.3093	160.668	1.46912	139.246
21TMS001	Spot 242	77.9087	28037.4	1.31719	20.714	1.36258	0.164441	1.53722	0.025288	0.70432	0.458178	160.99	1.11984	154.583	2.20424	57.4242	32.5639	160.99	1.11984	280.352
21TMS001	Spot 143	327.666	23434.8	1.21623	19.7355	1.0002	0.174724	1.39474	0.0254538	0.951867	0.68247	162.032	1.52311	163.511	2.1064	184.952	23.7456	162.032	1.52311	87.6076
21TMS001	Spot 206	370.924	27133.4	1.74702	20.107	0.64239	0.171123	0.979264	0.0254879	0.661636	0.675646	162.247	1.06009	160.393	1.4529	133.1	16.9647	162.247	1.06009	121.898
21TMS001	Spot 135	137.363	7322.69	1.63621	19.7424	1.06715	0.170556	1.26411	0.0256047	0.642159	0.507994	162.98	1.03347	159.901	1.8702	114.501	25.6671	162.98	1.03347	142.34
21TMS001	Spot 74	268.445	12232.5	1.67778	18.8211	1.19864	0.182796	1.55603	0.0257643	0.98958	0.635966	163.984	1.60228	170.464	2.44177	261.398	27.5641	163.984	1.60228	62.7332
21TMS001	Spot 211	279.16	226074	1.52974	20.0146	0.903767	0.176482	1.29015	0.0259664	0.920654	0.713602	165.254	1.50208	165.029	1.96511	161.828	21.1139	165.254	1.50208	102.117
21TMS001	Spot 153	273.286	98818.4	0.703106	19.9121	0.847983	0.179015	1.2838	0.0260513	0.963834	0.750769	165.787	1.57754	167.212	1.97923	187.405	19.7476	165.787	1.57754	88.465
21TMS001	Spot 97	152.815	5686.37	1.16588	19.1684	1.48013	0.177674	1.75395	0.02626	0.931507	0.531092	167.098	1.53653	166.057	2.68686	151.235	34.8064	167.098	1.53653	110.489
21TMS001	Spot 202	245.022	22307.7	1.92212	19.9013	0.549304	0.178301	0.992722	0.0263549	0.792175	0.797983	167.695	1.31131	166.598	1.5253	151.034	13.9965	167.695	1.31131	111.031
21TMS001	Spot 268	216.992	23128.1	1.86764	19.68	0.946378	0.181114	1.43225	0.0265083	1.0718	0.748334	168.658	1.78423	169.019	2.23002	174.054	22.18	168.658	1.78423	96.8994
21TMS001	Spot 44	112.218	31296.8	1.05303	20.3026	1.19344	0.177249	1.41087	0.0265652	0.750685	0.532073	169.015	1.25228	165.69	2.15691	118.434	28.1791	169.015	1.25228	142.708
21TMS001	Spot 99	67.6099	4190.53	1.47778	17.3552	2.56197	0.198736	2.80074	0.0269055	0.765157	0.273198	171.152	1.29235	184.057	4.71476	353.098	60.8674	171.152	1.29235	48.4716
21TMS001	Spot 181	186.741	26043.3	2.29138	19.874	0.995814	0.183363	1.50884	0.0269375	1.11009	0.735726	171.353	1.87712	170.95	2.37393	165.364	23.8614	171.353	1.87712	103.621
21TMS001	Spot 58	105.463	13540.5	1.53263	20.3739	1.38426	0.176796	1.75453	0.0269515	0.949733	0.541303	171.441	1.60677	165.3	2.67648	78.2166	35.0347	171.441	1.60677	219.187
21TMS001	Spot 251	82.7567	5818.41	1.88492	19.8536	1.24314	0.175546	1.50932	0.0269843	0.64579	0.427869	171.646	1.09385	164.22	2.28855	58.4766	32.5412	171.646	1.09385	293.53
21TMS001	Spot 259	173.355	57027.6	1.29232	19.8338	0.892125	0.184551	1.17004	0.027049	0.752277	0.642951	172.052	1.27719	171.969	1.85094	170.806	20.9324	172.052	1.27719	100.73
21TMS001	Spot 210	92.4469	3413.61	2.59347	20.0988	1.30945	0.168448	1.54101	0.0272264	0.747627	0.485153	173.166	1.2774	158.071	2.25577	NA	NA	173.166	1.2774
21TMS001	Spot 163	64.1385	5515.19	1.71292	19.9218	1.64895	0.177492	1.89366	0.0272702	0.76431	0.403615	173.441	1.30795	165.9	2.89838	59.6416	41.2849	173.441	1.30795	290.805
21TMS001	Spot 187	151.48	29885.4	1.69852	19.9804	1.01382	0.185242	1.18643	0.0273368	0.613053	0.516721	173.859	1.0516	172.561	1.8828	154.831	23.7738	173.859	1.0516	112.29
21TMS001	Spot 284	127.214	16746.9	1.35642	17.8258	1.51811	0.20639	1.69575	0.0274038	0.733284	0.432425	174.279	1.26084	190.519	2.94573	396.805	34.2797	174.279	1.26084	43.9206
21TMS001	Spot 299	254.224	37398.5	1.99886	20.0074	0.885053	0.18606	1.14565	0.027461	0.726394	0.634045	174.638	1.25153	173.262	1.82486	154.535	20.7345	174.638	1.25153	113.008
21TMS001	Spot 232	141.078	623194	1.83501	19.8499	1.1244	0.188461	1.30461	0.0274784	0.661627	0.507144	174.747	1.14064	175.316	2.10063	182.971	26.186	174.747	1.14064	95.505
21TMS001	Spot 261	41.9234	6244.3	1.60715	18.9804	1.88359	0.18838	3.14201	0.0274907	0.91843	0.292307	174.824	1.58406	175.246	5.05731	180.919	70.0421	174.824	1.58406	96.6312
21TMS001	Spot 272	65.5179	9283.9	2.10804	19.6401	1.45488	0.184768	1.69273	0.0274941	0.680956	0.402283	174.845	1.17462	172.156	2.68048	135.377	36.3987	174.845	1.17462	129.154
21TMS001	Spot 274	144.796	14033.4	1.7341	20.2086	1.4368	0.181412	1.93416	0.0274963	0.845875	0.437335	174.86	1.45921	169.275	3.0157	91.8991	41.1998	174.86	1.45921	190.274
21TMS001	Spot 72	210.609	205200	1.42969	20.154	0.808395	0.18625	1.31492	0.0275157	1.03706	0.78869	174.981	1.79025	173.425	2.09628	152.277	18.9203	174.981	1.79025	114.909
21TMS001	Spot 167	76.1822	27245.9	2.1717	19.8858	1.83632	0.187561	2.03215	0.0275302	0.867899	0.427085	175.072	1.499	174.546	3.25891	167.395	42.9519	175.072	1.499	104.587
21TMS001	Spot 144	277.014	10286.2	1.27381	19.9748	0.802075	0.184194	1.54237	0.0275912	0.608682	0.394642	175.455	1.05356	171.663	2.43597	119.753	33.3882	175.455	1.05356	146.514
21TMS001	Spot 310	197.988	77553.1	2.50811	20.0275	0.800843	0.187639	0.997044	0.0276111	0.59353	0.595289	175.58	1.02805	174.613	1.5995	161.546	18.7245	175.58	1.02805	108.687
21TMS001	Spot 23	145.522	18812.7	2.67656	19.6362	1.27588	0.189348	1.46165	0.027648	0.696804	0.476725	175.811	1.20851	176.072	2.36279	179.561	29.9389	175.811	1.20851	97.9117
21TMS001	Spot 94	133.273	9308.66	2.17463	16.9957	3.43961	0.216254	3.548	0.0276621	0.845369	0.238266	175.9	1.4669	198.787	6.40559	479.834	76.1849	175.9	1.4669	36.6585
21TMS001	Spot 225	50.5005	12074.9	1.96429	19.5902	2.04683	0.188213	2.28823	0.0277257	0.933583	0.407993	176.299	1.62359	175.103	3.68034	158.996	48.8856	176.299	1.62359	110.883
21TMS001	Spot 147	126.262	40794.1	1.42079	20.0494	1.09543	0.188472	1.28983	0.0277276	0.680629	0.527688	176.311	1.18376	175.325	2.07693	162.06	25.6218	176.311	1.18376	108.793
21TMS001	Spot 262	258.439	10532.4	1.82484	20.1061	0.733254	0.182618	1.39316	0.0277497	1.18357	0.849557	176.449	2.06007	170.31	2.18439	85.8843	17.4274	176.449	2.06007	205.45
21TMS001	Spot 22	418.892	59318.6	1.94944	19.8901	0.666979	0.190173	1.09355	0.0278334	0.860397	0.786797	176.974	1.50197	176.777	1.77421	174.118	15.7715	176.974	1.50197	101.64
21TMS001	Spot 266	103.098	21119.6	1.86994	19.6306	1.17189	0.190351	1.34075	0.0278351	0.634295	0.47309	176.985	1.10734	176.929	2.177	176.158	27.5352	176.985	1.10734	100.47
21TMS001	Spot 155	195.5	12323.5	2.09093	19.106	0.712658	0.195567	1.09232	0.0278716	0.64073	0.586576	177.214	1.12	181.368	1.81427	235.823	20.4181	177.214	1.12	75.1468
21TMS001	Spot 110	207.272	13499.2	1.6692	20.3675	0.819153	0.18284	1.16379	0.027883	0.813853	0.699312	177.285	1.42318	170.502	1.82663	77.3579	19.7621	177.285	1.42318	229.175
21TMS001	Spot 67	92.6471	25302.2	2.50319	19.8974	1.28278	0.190602	1.44532	0.02809	0.663299	0.45893	178.583	1.16828	177.143	2.34939	157.966	30.0304	178.583	1.16828	113.052
21TMS001	Spot 71	139.813	22110	2.43329	20.0029	1.13294	0.189208	1.41593	0.0280948	0.840541	0.593631	178.614	1.48071	175.954	2.28747	140.332	26.7328	178.614	1.48071	127.279
21TMS001	Spot 138	101.192	83217.2	2.07147	19.881	1.25057	0.193348	1.43333	0.0281406	0.700328	0.488603	178.901	1.23567	179.482	2.35803	187.122	29.104	178.901	1.23567	95.6066
21TMS001	Spot 79	120.416	19370.7	1.55601	17.0304	3.3639	0.229054	3.51983	0.0289446	1.00513	0.285563	183.94	1.82271	209.417	6.66076	506.69	74.2258	183.94	1.82271	36.3022
21TMS001	Spot 256	74.7335	4383.58	1.58008	12.12	5.42561	0.314479	5.90666	0.029165	1.13333	0.191873	185.32	2.07038	277.647	14.3496	1152.04	115.186	185.32	2.07038	16.0862
21TMS001	Spot 3	96.8225	5731.34	1.60172	19.7972	1.15469	0.191137	1.46215	0.0292148	0.821202	0.561639	185.632	1.50268	177.599	2.38236	71.9679	28.7794	185.632	1.50268	257.937
21TMS001	Spot 247	185.263	16027.5	2.10667	19.4953	0.724673	0.209025	1.1828	0.0304638	0.929969	0.786242	193.451	1.7723	192.734	2.07637	183.945	17.0455	193.451	1.7723	105.168
21TMS001	Spot 152	716.932	36509.3	3.30994	19.6662	0.543234	0.226166	0.965673	0.0326687	0.79761	0.825963	207.229	1.62659	207.029	1.80858	204.761	12.6081	207.229	1.62659	101.205
21TMS001	Spot 282	307.583	93330.5	4.08184	19.7022	0.608001	0.227002	1.07016	0.0329256	0.880014	0.822323	208.833	1.80831	207.72	2.0103	195.144	14.1619	208.833	1.80831	107.015
21TMS001	Spot 38	482.888	34929.1	3.7236	19.7437	0.777237	0.226338	1.28177	0.0330004	0.998184	0.778754	209.299	2.05564	207.171	2.40209	183.01	18.7311	209.299	2.05564	114.365
21TMS001	Spot 161	375.187	28601.2	3.77636	19.1912	0.638923	0.234667	0.999051	0.0331895	0.734209	0.734907	210.479	1.5204	214.044	1.92806	253.46	15.5593	210.479	1.5204	83.0423
21TMS001	Spot 227	482.242	78610	4.1472	19.4479	0.542416	0.247147	1.06285	0.0354091	0.913504	0.859482	224.314	2.01387	224.256	2.13866	223.675	12.5652	224.314	2.01387	100.286
21TMS001	Spot 205	656.315	75306	4.20702	19.5378	0.568823	0.246613	0.89491	0.0354375	0.688396	0.769235	224.49	1.51878	223.821	1.7976	216.806	13.2386	224.49	1.51878	103.544
21TMS001	Spot 142	217.535	29399.4	2.25792	19.3912	0.778904	0.250344	1.18057	0.0357361	0.882993	0.747937	226.349	1.96396	226.856	2.40011	232.09	18.0693	226.349	1.96396	97.5264
21TMS001	Spot 98	460.579	187422	2.94162	19.6088	0.509332	0.249364	0.951281	0.0358883	0.803364	0.844507	227.296	1.7942	226.06	1.9279	213.238	11.796	227.296	1.7942	106.593
21TMS001	Spot 123	178.56	21767.7	3.13706	19.6102	0.9345	0.250559	1.13939	0.0364611	0.640081	0.561776	230.86	1.45155	227.03	2.31797	187.522	21.94	230.86	1.45155	123.111
21TMS001	Spot 177	92.5467	576431	1.81563	18.9318	0.846586	0.332077	1.07055	0.0459652	0.655266	0.612082	289.703	1.8563	291.15	2.70987	302.786	19.2986	289.703	1.8563	95.679
21TMS001	Spot 171	116.196	30958.9	2.70888	18.4716	0.757859	0.435241	1.26027	0.059244	0.976118	0.774532	371.026	3.5194	366.891	3.88061	340.85	18.037	371.026	3.5194	108.853
21TMS001	Spot 159	265.227	54972.4	2.7408	18.281	0.570378	0.442765	1.00369	0.0593521	0.821169	0.818147	371.684	2.96583	372.2	3.12759	375.394	12.9875	371.684	2.96583	99.0119
21TMS001	Spot 290	56.5957	76937.7	1.53286	17.2566	0.874912	0.660435	1.08836	0.0837273	0.647232	0.594688	518.332	3.22348	514.88	4.39553	499.605	19.2694	518.332	3.22348	103.748
21TMS001	Spot 198	30.7391	24858.1	2.21931	16.2229	0.985556	0.880875	1.21381	0.105565	0.704268	0.580212	646.938	4.33502	641.455	5.77219	622.176	21.3459	646.938	4.33502	103.98
21TMS001	Spot 14	17.0111	18371.8	1.56114	14.001	1.14009	1.44332	1.37351	0.14964	0.758836	0.552479	898.944	6.36724	907.099	8.2386	926.999	23.518	926.999	23.518	96.9735
21TMS001	Spot 26	19.5896	62277.7	2.49034	13.5292	0.998886	1.68977	1.33775	0.167956	0.8898	0.665147	1000.84	8.24862	1004.68	8.53351	1013.03	20.245	1013.03	20.245	98.7966
21TMS001	Spot 166	28.2326	13530.6	1.63203	13.3638	0.683781	1.80471	0.936693	0.178616	0.625012	0.667254	1059.41	6.10596	1047.17	6.12001	1021.7	14.1229	1021.7	14.1229	103.691
21TMS001	Spot 10	28.0746	16912.8	3.07291	13.2263	0.766179	1.82639	1.08549	0.178727	0.61531	0.566852	1060.01	6.01435	1054.98	7.12235	1044.61	18.058	1044.61	18.058	101.475
21TMS001	Spot 115	491.91	5.57928e+07	5.4005	13.3243	0.417581	1.76324	0.915856	0.171941	0.815119	0.890007	1022.8	7.70928	1032.04	5.93411	1051.7	8.4148	1051.7	8.4148	97.2522
21TMS001	Spot 254	29.5978	16606.5	2.73566	13.0457	0.848728	1.85342	1.18849	0.179796	0.823469	0.692868	1065.86	8.08982	1064.65	7.83869	1062.18	17.2415	1062.18	17.2415	100.346
21TMS001	Spot 278	61.9529	107173	1.49291	13.1868	0.716141	1.8784	0.994457	0.182178	0.68998	0.693826	1078.86	6.85437	1073.5	6.58959	1062.64	14.3909	1062.64	14.3909	101.526
21TMS001	Spot 315	66.807	56853	3.65444	13.2103	0.598465	1.8852	1.11324	0.182786	0.935926	0.840724	1082.18	9.32389	1075.89	7.38596	1063.2	12.112	1063.2	12.112	101.785
21TMS001	Spot 226	30.0128	32293.8	2.96774	13.0839	0.674231	1.94274	1.05572	0.187656	0.812084	0.769222	1108.66	8.27163	1095.94	7.077	1070.78	13.5509	1070.78	13.5509	103.538
21TMS001	Spot 283	320.385	282994	10.2382	13.0841	0.463382	1.82838	0.88358	0.175637	0.752309	0.851433	1043.1	7.24533	1055.7	5.79975	1081.87	9.296	1081.87	9.296	96.4163
21TMS001	Spot 37	96.0717	55950.4	2.45101	13.0433	0.493516	1.95206	0.780168	0.187081	0.598629	0.767308	1105.54	6.08169	1099.15	5.23829	1086.55	10.0451	1086.55	10.0451	101.747
21TMS001	Spot 65	37.519	15777.9	2.48655	12.9226	0.787453	1.82047	1.19304	0.174253	0.768344	0.644022	1035.5	7.35008	1052.85	7.81908	1089	18.2701	1089	18.2701	95.0868
21TMS001	Spot 287	50.0219	35501.7	2.70163	12.9674	0.947908	1.88619	1.08318	0.180125	0.520852	0.480857	1067.66	5.12483	1076.24	7.18781	1093.67	18.9998	1093.67	18.9998	97.6221
21TMS001	Spot 19	49.9527	62096.2	2.46532	12.9939	0.75457	1.98416	1.0199	0.189339	0.684755	0.671393	1117.79	7.02729	1110.14	6.88573	1095.17	15.1138	1095.17	15.1138	102.065
21TMS001	Spot 108	212.907	108309	25.4598	12.7529	0.541196	2.06345	1.00445	0.192961	0.846015	0.842268	1137.4	8.82146	1136.77	6.86986	1135.58	10.7938	1135.58	10.7938	100.16
21TMS001	Spot 80	76.5391	85545.9	6.87288	12.7072	0.61249	2.05159	0.942453	0.191366	0.715613	0.759309	1128.77	7.40998	1132.83	6.43369	1140.61	12.1948	1140.61	12.1948	98.9618
21TMS001	Spot 154	188.28	282432	1.22124	12.7459	0.425235	1.99022	0.857961	0.185034	0.745155	0.868519	1094.41	7.50041	1112.2	5.79829	1147.13	8.44738	1147.13	8.44738	95.4047
21TMS001	Spot 312	197.393	1.35814e+06	3.44667	12.5923	0.501092	2.13375	1.05033	0.196692	0.923093	0.87886	1157.53	9.78066	1159.8	7.26176	1164.03	9.94963	1164.03	9.94963	99.4409
21TMS001	Spot 78	40.82	25120.3	1.74663	11.9862	0.644306	2.46363	1.10176	0.217768	0.891736	0.809375	1270.07	10.2798	1261.43	7.95737	1246.74	12.652	1246.74	12.652	101.871
21TMS001	Spot 185	20.5539	39797	0.745716	11.9824	1.00748	2.26999	1.28947	0.199767	0.799274	0.619847	1174.07	8.57908	1203.01	9.0893	1255.38	19.7718	1255.38	19.7718	93.5228
21TMS001	Spot 36	52.2809	67885	2.91331	11.4449	0.530535	2.71449	0.77598	0.228054	0.565115	0.72826	1324.29	6.76513	1332.43	5.75804	1345.51	10.2687	1345.51	10.2687	98.4232
21TMS001	Spot 4	66.6744	118511	1.99194	11.4433	0.579125	2.83958	0.926322	0.238427	0.722872	0.780368	1378.51	8.97149	1366.06	6.95615	1346.62	11.1836	1346.62	11.1836	102.369
21TMS001	Spot 62	49.3822	21036.1	2.11055	11.3713	0.751416	2.79689	0.994527	0.234746	0.594196	0.597466	1359.33	7.2823	1354.71	7.43878	1347.4	15.3968	1347.4	15.3968	100.885
21TMS001	Spot 230	164.472	166754	3.59037	11.418	0.446591	2.83786	0.781261	0.238123	0.640966	0.820426	1376.93	7.94677	1365.6	5.86587	1347.91	8.62161	1347.91	8.62161	102.153
21TMS001	Spot 82	56.1342	63366.5	2.86031	11.3967	0.714991	2.80075	1.08967	0.234661	0.82203	0.754384	1358.88	10.0716	1355.74	8.15341	1350.77	13.8036	1350.77	13.8036	100.6
21TMS001	Spot 269	42.7152	102668	2.9548	11.3903	0.673919	2.76115	0.862924	0.231333	0.538917	0.624525	1341.48	6.52684	1345.1	6.43247	1350.85	13.0057	1350.85	13.0057	99.3068
21TMS001	Spot 124	44.4615	30116.3	3.14657	11.3808	0.609866	2.8093	0.871393	0.235356	0.616064	0.706987	1362.51	7.56618	1358.02	6.52533	1350.94	11.8913	1350.94	11.8913	100.856
21TMS001	Spot 271	48.0695	51873.3	3.96331	11.372	0.694919	2.89451	0.988822	0.242371	0.703068	0.711016	1399.01	8.84191	1380.48	7.46239	1351.92	13.416	1351.92	13.416	103.483
21TMS001	Spot 238	177.328	293732	2.24535	11.3941	0.49489	2.78653	0.746623	0.23331	0.559032	0.748747	1351.82	6.81736	1351.93	5.57902	1352.09	9.54819	1352.09	9.54819	99.9804
21TMS001	Spot 156	60.5306	75857.2	2.66266	11.4581	0.568282	2.78672	0.898727	0.233251	0.695649	0.774038	1351.52	8.48166	1351.98	6.71575	1352.7	10.977	1352.7	10.977	99.9121
21TMS001	Spot 102	85.1524	231978	3.56591	11.3979	0.584878	2.75057	0.815244	0.2298	0.567907	0.69661	1333.45	6.84087	1342.24	6.07083	1356.27	11.2778	1356.27	11.2778	98.3179
21TMS001	Spot 195	37.6357	46121.5	3.26064	11.3677	0.544847	2.73888	0.934568	0.228614	0.75899	0.812129	1327.23	9.1042	1339.07	6.95151	1358.04	10.5118	1358.04	10.5118	97.7318
21TMS001	Spot 52	46.4511	79968.4	1.96211	11.3844	0.67007	2.80572	0.940599	0.234083	0.65963	0.701287	1355.86	8.06575	1357.07	7.04124	1358.94	12.9241	1358.94	12.9241	99.7733
21TMS001	Spot 145	95.8285	117948	3.64279	11.4358	0.446934	2.77247	0.909474	0.231277	0.792043	0.870881	1341.19	9.59058	1348.15	6.78684	1359.2	8.6158	1359.2	8.6158	98.6748
21TMS001	Spot 20	49.145	64100.2	2.87534	11.3428	0.511063	2.79877	0.81405	0.233022	0.632807	0.777357	1350.32	7.70931	1355.21	6.0899	1362.92	9.8651	1362.92	9.8651	99.0753
21TMS001	Spot 302	74.9027	149198	2.20606	11.3622	0.4813	2.83952	0.91967	0.236403	0.783642	0.852091	1367.97	9.65895	1366.04	6.90616	1363.01	9.27293	1363.01	9.27293	100.364
21TMS001	Spot 5	77.4895	68966.7	2.51872	11.3339	0.547915	2.85161	0.917223	0.237217	0.734749	0.801058	1372.21	9.0815	1369.23	6.8954	1364.58	10.5745	1364.58	10.5745	100.56
21TMS001	Spot 314	36.5768	32534.3	1.63725	11.3058	0.663329	2.81806	0.925616	0.234341	0.644776	0.696591	1357.21	7.89115	1360.35	6.93705	1365.28	12.7891	1365.28	12.7891	99.4092
21TMS001	Spot 104	63.6077	73723.3	4.27722	11.2817	0.567122	2.85279	0.762304	0.236253	0.50826	0.666741	1367.19	6.26144	1369.55	5.73135	1373.2	10.928	1373.2	10.928	99.5621
21TMS001	Spot 222	29.155	16451	2.21254	11.0658	0.75241	2.96244	1.00078	0.243109	0.647693	0.64719	1402.84	8.16544	1398.04	7.59735	1390.71	14.6397	1390.71	14.6397	100.872
21TMS001	Spot 107	46.627	25470.5	2.1779	11.1031	0.570356	3.05738	0.925602	0.250024	0.728346	0.78689	1438.6	9.39117	1422.08	7.08215	1397.42	10.9503	1397.42	10.9503	102.947
21TMS001	Spot 308	41.4925	46067.9	2.45959	11.0911	1.25315	3.01065	1.93607	0.245357	1.4752	0.761957	1414.48	18.7359	1410.32	14.758	1404.01	24.0171	1404.01	24.0171	100.746
21TMS001	Spot 213	84.9001	362901	2.78585	11.0007	0.476653	3.06492	0.82916	0.247532	0.678458	0.818248	1425.73	8.67803	1423.97	6.34806	1421.31	9.10845	1421.31	9.10845	100.311
21TMS001	Spot 85	34.3795	29451	3.62781	10.9495	0.570998	2.93387	1.09535	0.236779	0.926695	0.846028	1369.93	11.4369	1390.69	8.29493	1422.67	11.1572	1422.67	11.1572	96.2933
21TMS001	Spot 151	35.4455	18458.6	1.93076	10.9817	0.577522	3.00408	0.874162	0.242398	0.654679	0.748922	1399.15	8.23409	1408.66	6.65942	1423.04	11.0668	1423.04	11.0668	98.3214
21TMS001	Spot 248	104.442	721008	5.96194	10.9718	0.400573	3.04165	0.758405	0.245145	0.643987	0.849133	1413.39	8.17331	1418.14	5.79544	1425.26	7.65049	1425.26	7.65049	99.1668
21TMS001	Spot 92	53.3361	54374.1	2.04584	10.9617	0.599978	3.00303	0.870406	0.241931	0.627433	0.720851	1396.73	7.87916	1408.39	6.63023	1426.06	11.5206	1426.06	11.5206	97.9431
21TMS001	Spot 281	60.611	59975.5	3.64011	10.9315	0.495409	3.08726	0.779383	0.248311	0.5996	0.769327	1429.76	7.68871	1429.53	5.9776	1429.18	9.50452	1429.18	9.50452	100.041
21TMS001	Spot 27	112.692	62193.5	4.84448	10.9521	0.519592	3.07336	0.837578	0.247131	0.655741	0.782902	1423.66	8.37658	1426.07	6.41685	1429.65	9.94643	1429.65	9.94643	99.581
21TMS001	Spot 165	56.1831	59258.7	5.36841	10.9455	0.680133	3.07448	1.14571	0.246356	0.921742	0.804518	1419.65	11.7449	1426.35	8.77837	1436.34	12.9768	1436.34	12.9768	98.8381
21TMS001	Spot 29	62.2754	51762.9	3.46953	10.8904	0.599957	3.07414	0.886541	0.245873	0.652593	0.736112	1417.16	8.30229	1426.27	6.7924	1439.88	11.4379	1439.88	11.4379	98.4221
21TMS001	Spot 132	187.47	404418	2.87902	10.9354	0.476733	3.10841	0.975333	0.248431	0.850881	0.8724	1430.38	10.9151	1434.77	7.49299	1441.27	9.08539	1441.27	9.08539	99.2443
21TMS001	Spot 66	116.969	65291.9	1.63943	10.0925	0.544192	3.56375	0.890996	0.263878	0.704789	0.791012	1509.65	9.48585	1541.5	7.06477	1585.43	10.1899	1585.43	10.1899	95.2207
21TMS001	Spot 235	111.896	64170.5	3.22974	9.8143	0.456942	3.98364	0.71828	0.287872	0.552959	0.769838	1630.89	7.96781	1630.87	5.82991	1630.83	8.52071	1630.83	8.52071	100.004
21TMS001	Spot 103	58.0322	60808.1	2.27393	9.79087	0.513514	3.91833	0.917725	0.281635	0.759563	0.827659	1599.59	10.7598	1617.47	7.42392	1640.81	9.56081	1640.81	9.56081	97.4881
21TMS001	Spot 214	67.7192	66736.6	4.9986	9.66443	1.14492	4.21363	1.80894	0.299555	1.4004	0.774154	1689.1	20.8091	1676.68	14.8457	1661.15	21.1988	1661.15	21.1988	101.683
21TMS001	Spot 73	33.5217	31808.5	1.65901	9.66455	0.496233	4.12201	0.874618	0.292815	0.719152	0.822246	1655.58	10.5002	1658.68	7.14701	1662.58	9.21256	1662.58	9.21256	99.579
21TMS001	Spot 54	43.8886	36162.7	1.76156	9.60692	0.595648	4.16913	0.986309	0.294099	0.785389	0.796291	1661.98	11.5061	1667.97	8.07755	1675.51	11.0261	1675.51	11.0261	99.1925
21TMS001	Spot 87	128.155	120540	2.75395	9.5994	0.543442	4.19961	0.954261	0.296031	0.784396	0.821993	1671.6	11.5498	1673.94	7.82607	1676.87	10.0415	1676.87	10.0415	99.6857
21TMS001	Spot 194	103.408	2.17951e+06	1.38671	9.62257	0.49047	3.95641	0.82147	0.278606	0.658979	0.802194	1584.34	9.25644	1625.31	6.65828	1678.74	9.06043	1678.74	9.06043	94.377
21TMS001	Spot 121	85.0417	188203	4.28238	9.59432	0.599285	4.30002	0.849754	0.302133	0.602426	0.708941	1701.88	9.01083	1693.37	7.0004	1682.83	11.0652	1682.83	11.0652	101.132
21TMS001	Spot 17	85.2467	88408.1	2.80315	9.57848	0.57192	4.24729	0.941786	0.298418	0.747961	0.794195	1683.46	11.0817	1683.21	7.74047	1682.89	10.5663	1682.89	10.5663	100.034
21TMS001	Spot 197	88.7655	98030.1	5.24932	9.58448	0.510096	4.21495	0.71208	0.296005	0.496289	0.696957	1671.47	7.30711	1676.93	5.84394	1683.76	9.42702	1683.76	9.42702	99.2698
21TMS001	Spot 173	55.2861	40428.8	5.03028	9.55843	0.495041	4.22991	0.749834	0.296357	0.558648	0.745029	1673.22	8.23279	1679.84	6.15796	1688.11	9.22847	1688.11	9.22847	99.1178
21TMS001	Spot 109	217.418	101175	22.8209	9.52675	0.45099	3.93916	1.13206	0.275074	1.03824	0.917123	1566.5	14.4388	1621.77	9.16773	1694.22	8.31939	1694.22	8.31939	92.4615
21TMS001	Spot 277	56.7737	42459.1	4.10455	9.42871	0.533262	4.18003	0.855681	0.290346	0.667857	0.780498	1643.26	9.6875	1670.11	7.01126	1704.02	9.84852	1704.02	9.84852	96.4343
21TMS001	Spot 106	59.6618	26941.7	2.16798	9.398	0.537551	3.98388	1.33537	0.275473	1.22215	0.91521	1568.52	17.0157	1630.92	10.839	1712.34	9.8969	1712.34	9.8969	91.6012
21TMS001	Spot 285	61.5497	25949.3	4.7792	9.3318	0.578403	4.42516	0.834127	0.304196	0.600977	0.720486	1712.08	9.03624	1717.06	6.90853	1723.12	10.6258	1723.12	10.6258	99.3596
21TMS001	Spot 149	9.03652	32887	3.77817	9.28883	0.888739	4.36987	1.31202	0.296919	0.965017	0.735519	1676.01	14.2423	1706.66	10.8416	1744.47	16.2837	1744.47	16.2837	96.0756
21TMS001	Spot 91	46.9845	41723.3	2.07192	9.22579	0.614478	4.59367	0.986816	0.311532	0.769716	0.78	1748.24	11.7862	1748.12	8.22884	1747.96	11.3069	1747.96	11.3069	100.016
21TMS001	Spot 69	176.245	213745	5.39178	9.15549	0.448552	4.53649	0.940203	0.304255	0.826292	0.878844	1712.37	12.4259	1737.69	7.8225	1768.28	8.19393	1768.28	8.19393	96.8383
21TMS001	Spot 297	141.88	126597	3.79583	9.13791	0.459026	4.66635	0.822251	0.312386	0.682083	0.829531	1752.44	10.4661	1761.23	6.87567	1771.65	8.3825	1771.65	8.3825	98.9154
21TMS001	Spot 160	38.6391	29325.5	1.12276	8.89377	0.501074	4.95319	0.814651	0.322779	0.632992	0.77701	1803.29	9.95715	1811.37	6.88245	1820.66	9.3053	1820.66	9.3053	99.0457
21TMS001	Spot 236	176.368	444951	2.07816	8.84287	0.399174	4.99411	0.759981	0.324576	0.646706	0.850951	1812.04	10.2156	1818.33	6.42942	1825.52	7.24045	1825.52	7.24045	99.2617
21TMS001	Spot 9	32.6253	67215.1	0.930154	8.82352	0.533122	5.18421	0.808067	0.335244	0.607077	0.751271	1863.75	9.82567	1850.03	6.87832	1834.62	9.66288	1834.62	9.66288	101.588
21TMS001	Spot 196	292.694	126472	16.4565	8.82455	0.37303	4.84698	0.883335	0.313279	0.800677	0.906425	1756.82	12.3126	1793.09	7.43537	1835.53	6.75904	1835.53	6.75904	95.712
21TMS001	Spot 309	78.5206	87113.1	2.98709	8.77934	0.58861	5.09578	0.893542	0.328073	0.671817	0.751859	1829.03	10.6984	1835.4	7.58463	1842.62	10.6637	1842.62	10.6637	99.2625
21TMS001	Spot 7	37.6551	59866.2	4.75503	8.6587	0.463489	5.13967	0.769268	0.326521	0.613844	0.797959	1821.5	9.74033	1842.69	6.53888	1866.69	8.36799	1866.69	8.36799	97.5791
21TMS001	Spot 279	33.1951	12734.6	1.91394	8.32031	1.97875	5.34272	2.10329	0.329252	0.696733	0.331259	1834.75	11.1251	1875.72	17.9912	1921.4	35.5832	1921.4	35.5832	95.4904
21TMS001	Spot 267	144.89	1.39783e+06	1.69406	8.08403	0.503598	5.74045	1.21489	0.340987	1.1056	0.91004	1891.42	18.123	1937.48	10.5061	1987.08	8.96034	1987.08	8.96034	95.1856
21TMS001	Spot 249	23.5389	161890	1.68047	7.78816	0.685679	6.47726	0.967199	0.370718	0.682134	0.705268	2032.78	11.8928	2042.81	8.50755	2052.95	12.1081	2052.95	12.1081	99.0176
21TMS001	Spot 303	128.225	63446	3.59791	7.77886	0.462228	6.35682	0.949156	0.362531	0.828969	0.873374	1994.16	14.2186	2026.33	8.32774	2059.24	8.15725	2059.24	8.15725	96.8398
21TMS001	Spot 307	29.2522	49993.4	2.94463	7.75756	0.709173	6.37104	2.22554	0.362688	2.10905	0.947653	1994.9	36.1864	2028.29	19.5345	2062.42	12.5325	2062.42	12.5325	96.7263
21TMS001	Spot 223	26.6878	60928.7	1.45608	7.73215	0.629966	6.6634	0.89661	0.379221	0.637356	0.710851	2072.64	11.2969	2067.78	7.9162	2062.93	11.1208	2062.93	11.1208	100.471
21TMS001	Spot 176	90.9871	97889.3	2.3959	7.778	0.516613	6.6512	0.732025	0.378454	0.5185	0.70831	2069.06	9.17674	2066.16	6.46148	2063.27	9.11388	2063.27	9.11388	100.281
21TMS001	Spot 116	73.2668	279996	3.30395	7.07993	0.458999	7.83702	0.82915	0.406206	0.690512	0.832795	2197.55	12.8584	2212.47	7.46648	2226.3	7.94801	2226.3	7.94801	98.7087
21TMS001	Spot 133	228.918	155515	2.28878	7.07658	1.9043	2.15584	3.11919	0.111442	2.47041	0.792005	681.119	15.968	1166.93	21.6391	2230.93	32.9661	2230.93	32.9661	30.5307
21TMS001	Spot 182	20.3861	13407.9	3.00768	5.47554	0.505694	12.5478	0.918243	0.50467	0.766342	0.834574	2633.84	16.5695	2646.32	8.63569	2655.86	8.38832	2655.86	8.38832	99.1707
21TMS001	Spot 188	61.6795	60448.8	2.06154	5.40488	0.375693	12.6255	0.739892	0.499596	0.637007	0.860946	2612.06	13.6807	2652.12	6.96147	2682.82	6.2219	2682.82	6.2219	97.3624
21TMS001	Spot 216	32.1636	64765.9	2.01928	5.3715	0.423208	12.7847	0.77805	0.504667	0.652558	0.83871	2633.82	14.1092	2663.92	7.3272	2686.84	7.00218	2686.84	7.00218	98.0266
21TMS001	Spot 200	102.172	114095	32.3067	5.04794	1.17227	11.8323	2.09218	0.43803	1.73291	0.828281	2341.82	34.0279	2591.22	19.5906	2792.44	19.1912	2792.44	19.1912	83.8628
21TMS009	Spot 238	881.495	13603.2	1.03998	21.4389	2.23613	0.00934102	2.62388	0.00150626	1.20386	0.45881	9.70266	0.116719	9.44069	0.246565	NA	NA	9.70266	0.116719
21TMS009	Spot 98	754.714	12759.8	1.57754	21.244	1.55655	0.0239484	3.27725	0.0038294	2.77904	0.847979	24.6387	0.683413	24.0302	0.778285	NA	NA	24.6387	0.683413
21TMS009	Spot 64	141.101	3112.11	1.40002	21.8139	3.3411	0.0216991	6.88308	0.00386918	1.4262	0.207203	24.8942	0.354356	21.7973	1.48434	NA	NA	24.8942	0.354356
21TMS009	Spot 267	178.651	6195.59	1.8136	21.4301	3.24787	0.0236479	3.87249	0.00392684	1.55647	0.401928	25.2645	0.392463	23.7322	0.908372	NA	NA	25.2645	0.392463
21TMS009	Spot 291	114.924	27580.2	1.14296	19.3558	3.58645	0.027329	3.89707	0.00392736	1.52444	0.391177	25.2678	0.384439	27.377	1.05265	216.619	83.0587	25.2678	0.384439	11.6646
21TMS009	Spot 248	128.668	4179.43	2.08333	19.7095	3.12389	0.0253651	3.47901	0.00394704	1.16477	0.334798	25.3942	0.295201	25.434	0.873863	29.2042	NA	25.3942	0.295201	86.9538
21TMS009	Spot 114	369.093	14773.6	2.77015	19.7517	1.92105	0.0267352	2.21366	0.00395276	0.938815	0.4241	25.4309	0.238279	26.7899	0.585284	150.43	46.9889	25.4309	0.238279	16.9055
21TMS009	Spot 25	131.646	4534.75	1.52608	20.7211	3.1367	0.024311	3.54718	0.00395612	1.29144	0.364076	25.4525	0.328056	24.3897	0.854837	NA	NA	25.4525	0.328056
21TMS009	Spot 36	218.584	3779.8	0.80518	20.3821	2.8198	0.0244246	5.3817	0.00395979	1.436	0.266831	25.476	0.365115	24.5023	1.30286	NA	NA	25.476	0.365115
21TMS009	Spot 162	311.491	46403.1	0.781698	20.7318	2.30431	0.0259188	2.51355	0.00396406	0.998008	0.397051	25.5034	0.254023	25.9822	0.64479	70.5027	54.8607	25.5034	0.254023	36.1737
21TMS009	Spot 139	215.641	68281.1	1.29377	20.2101	2.41156	0.0266808	2.84852	0.00397013	1.51604	0.532221	25.5425	0.386468	26.7362	0.751645	135.395	56.7022	25.5425	0.386468	18.8651
21TMS009	Spot 87	89.6829	3056.56	1.15459	17.42	5.71142	0.0284918	6.75134	0.00397195	2.04251	0.302534	25.5541	0.520912	28.5256	1.89906	286.538	147.236	25.5541	0.520912	8.91824
21TMS009	Spot 55	84.5549	4437.24	1.1192	17.7533	4.43292	0.0287582	4.8746	0.00397243	1.89893	0.389555	25.5572	0.484351	28.7886	1.38362	307.467	102.291	25.5572	0.484351	8.31216
21TMS009	Spot 81	71.8368	41191.3	1.15072	10.0147	10.8253	0.0539908	10.9291	0.00397343	1.50239	0.137468	25.5636	0.383306	53.3926	5.68462	1596.84	202.679	25.5636	0.383306	1.60089
21TMS009	Spot 122	83.1177	48165	1.19625	19.3651	4.04531	0.0278413	4.24553	0.00397554	1.28658	0.303043	25.5772	0.328418	27.8832	1.16768	231.363	93.4383	25.5772	0.328418	11.055
21TMS009	Spot 47	434.963	10688.6	1.22258	20.7188	2.28058	0.0255089	2.47725	0.00398128	0.941047	0.379875	25.614	0.240562	25.5765	0.625681	22.0395	NA	25.614	0.240562	116.219
21TMS009	Spot 297	256.901	5926.74	1.57639	20.447	2.36408	0.0251777	2.7686	0.00398512	1.04869	0.378781	25.6387	0.268337	25.2484	0.690408	NA	NA	25.6387	0.268337
21TMS009	Spot 229	59.7407	4682.28	0.993725	15.8321	6.842	0.0326144	7.54791	0.00398527	1.85697	0.246025	25.6396	0.475175	32.5875	2.42063	580.117	159.118	25.6396	0.475175	4.41974
21TMS009	Spot 73	146.602	4212.44	1.17247	18.8582	3.49462	0.0269832	3.75653	0.0039914	1.23306	0.328245	25.679	0.316008	27.0352	1.00218	149.317	83.2179	25.679	0.316008	17.1977
21TMS009	Spot 171	255.493	54341.1	0.915565	20.9688	3.29289	0.0258543	3.44481	0.00399674	1.01157	0.293652	25.7133	0.259591	25.9184	0.881542	44.9579	NA	25.7133	0.259591	57.1942
21TMS009	Spot 302	185.962	5480.11	1.28016	20.6238	3.79901	0.0249316	4.21031	0.00399787	1.16649	0.277055	25.7206	0.299429	25.0047	1.03992	NA	NA	25.7206	0.299429
21TMS009	Spot 53	84.6596	4856.52	1.33427	17.6969	4.81	0.0291973	5.02643	0.0039979	1.2981	0.258255	25.7207	0.333216	29.2219	1.44789	327.401	110.253	25.7207	0.333216	7.85604
21TMS009	Spot 182	122.609	3506.89	1.37973	20.0964	3.01656	0.0248509	5.65517	0.00400048	1.12308	0.198593	25.7373	0.288474	24.9248	1.39238	NA	NA	25.7373	0.288474
21TMS009	Spot 272	75.2793	5703.94	1.40401	16.8883	4.70162	0.0308418	5.07292	0.00400314	1.78933	0.352722	25.7544	0.459912	30.8431	1.54112	447.491	105.52	25.7544	0.459912	5.75528
21TMS009	Spot 227	284.674	8214.88	0.862405	20.5704	2.47491	0.0255244	2.66979	0.00400319	0.960666	0.359828	25.7547	0.246923	25.5918	0.674709	10.3282	NA	25.7547	0.246923	249.362
21TMS009	Spot 206	174.743	6279.37	1.57203	20.0958	2.90655	0.0258878	3.62583	0.00400458	1.21216	0.334312	25.7637	0.311674	25.9516	0.929039	43.4066	NA	25.7637	0.311674	59.3543
21TMS009	Spot 247	68.5265	11542.6	1.27594	18.2566	5.62153	0.0291645	5.7976	0.00400535	1.41311	0.243741	25.7685	0.363411	29.1895	1.6682	320.646	127.829	25.7685	0.363411	8.03644
21TMS009	Spot 314	209.801	9826.42	2.68496	21.8077	2.60884	0.0242333	2.90469	0.00401651	1.16203	0.400054	25.8402	0.29967	24.3126	0.697818	NA	NA	25.8402	0.29967
21TMS009	Spot 200	91.8558	21348.4	1.42832	19.689	3.93506	0.027427	4.19641	0.00401847	1.44587	0.34455	25.8528	0.37305	27.4738	1.13746	171.618	92.0127	25.8528	0.37305	15.0642
21TMS009	Spot 275	120.482	16236.6	1.82671	21.5684	3.73688	0.0248354	3.98426	0.00401944	1.37438	0.344953	25.859	0.35469	24.9094	0.980381	NA	NA	25.859	0.35469
21TMS009	Spot 279	175.996	13346.2	1.73343	20.9131	2.98634	0.0255448	3.2365	0.00402197	1.23045	0.380179	25.8753	0.317744	25.612	0.818565	0.992638	NA	25.8753	0.317744	2606.72
21TMS009	Spot 231	270.32	4328.86	1.11507	20.7237	2.09186	0.0245815	2.25359	0.00402405	0.818258	0.363091	25.8886	0.211411	24.6578	0.548992	NA	NA	25.8886	0.211411
21TMS009	Spot 92	293.956	11307.5	1.58623	21.3425	2.05448	0.0250132	2.27331	0.00402735	0.8251	0.362951	25.9098	0.213353	25.0855	0.563285	NA	NA	25.9098	0.213353
21TMS009	Spot 177	142.017	72098.6	1.74456	20.7988	3.11834	0.0263152	3.41838	0.00402784	1.40039	0.409665	25.913	0.362155	26.3745	0.889973	68.6565	NA	25.913	0.362155	37.7429
21TMS009	Spot 146	541.525	15015.8	0.918041	19.4486	2.72301	0.0277138	2.87307	0.00402793	0.878523	0.305778	25.9135	0.227199	27.7572	0.786685	190.427	63.6416	25.9135	0.227199	13.6081
21TMS009	Spot 183	254.596	6581.96	1.2262	20.8667	2.36206	0.0250973	3.05543	0.00402806	1.27483	0.417235	25.9144	0.329702	25.1689	0.759564	NA	NA	25.9144	0.329702
21TMS009	Spot 76	92.5353	4900.28	1.08407	22.1192	2.88035	0.0232082	3.81589	0.00403011	1.47373	0.38621	25.9276	0.381336	23.2959	0.878825	NA	NA	25.9276	0.381336
21TMS009	Spot 131	51.081	3508.74	1.18933	24.8437	3.73527	0.0197849	4.66259	0.00403016	2.69674	0.578378	25.9279	0.697802	19.8931	0.918506	NA	NA	25.9279	0.697802
21TMS009	Spot 192	88.302	3725.23	1.41208	18.4534	5.041	0.0276351	5.25198	0.00403439	1.39544	0.265698	25.9551	0.361459	27.6795	1.43408	180.023	118.087	25.9551	0.361459	14.4176
21TMS009	Spot 259	166.603	13846.6	0.985809	20.3135	2.88345	0.0264242	3.08521	0.0040349	1.05646	0.342428	25.9583	0.273688	26.4823	0.80647	74.272	68.9232	25.9583	0.273688	34.9503
21TMS009	Spot 66	180.213	3847.68	1.04965	21.4747	2.63488	0.0235309	3.29293	0.00403653	1.23465	0.374939	25.9688	0.319978	23.6161	0.768689	NA	NA	25.9688	0.319978
21TMS009	Spot 294	380.041	41949.7	0.839007	20.9935	2.07217	0.0259763	2.37096	0.00403689	1.15132	0.485593	25.9711	0.29841	26.0391	0.60953	32.35	NA	25.9711	0.29841	80.2815
21TMS009	Spot 264	140.303	3457.02	1.38985	21.0946	3.5908	0.0236853	5.08535	0.00403707	1.23545	0.242942	25.9722	0.320227	23.7693	1.19471	NA	NA	25.9722	0.320227
21TMS009	Spot 255	212.145	145888	1.61858	20.3612	2.89184	0.0269221	3.12757	0.00403779	1.1912	0.38087	25.9769	0.308814	26.9748	0.832548	116.798	68.2054	25.9769	0.308814	22.2409
21TMS009	Spot 195	61.0394	4299.15	1.24498	16.0631	4.30707	0.0323968	4.56194	0.00403834	1.41131	0.309366	25.9804	0.365926	32.3735	1.45357	536.665	94.9948	25.9804	0.365926	4.84109
21TMS009	Spot 250	136.601	7524.6	0.950732	20.4165	3.51982	0.0258515	3.74926	0.00404038	1.23385	0.329093	25.9935	0.320076	25.9156	0.959349	18.7247	NA	25.9935	0.320076	138.819
21TMS009	Spot 310	207.202	163810	0.981324	20.6501	3.10688	0.0265814	3.26017	0.004042	0.987929	0.30303	26.0039	0.256382	26.6378	0.857145	84.1844	73.7146	26.0039	0.256382	30.8892
21TMS009	Spot 102	62.8027	161702	0.984132	16.8629	6.38258	0.0326013	6.66831	0.0040423	1.93106	0.289587	26.0058	0.501176	32.5746	2.13771	548.299	139.536	26.0058	0.501176	4.743
21TMS009	Spot 273	117.711	3169.68	1.92362	20.5791	3.54887	0.0241838	3.7678	0.00404981	0.996778	0.264552	26.054	0.259176	24.2636	0.903368	NA	NA	26.054	0.259176
21TMS009	Spot 48	99.146	5836.85	0.936675	17.2237	5.30003	0.0307744	5.53433	0.0040533	1.58837	0.287003	26.0765	0.413354	30.7767	1.67773	414.862	118.55	26.0765	0.413354	6.28558
21TMS009	Spot 311	302.627	16670.3	1.21629	19.5979	3.02559	0.0276612	3.27618	0.00405465	1.23985	0.378444	26.0851	0.322763	27.7053	0.895404	170.544	70.8049	26.0851	0.322763	15.2952
21TMS009	Spot 288	349.899	10645.7	2.47965	20.7408	1.81063	0.0258602	2.629	0.00405638	1.19564	0.45479	26.0962	0.311386	25.9242	0.672919	9.99001	NA	26.0962	0.311386	261.223
21TMS009	Spot 236	489.635	13582.9	1.26902	20.9311	1.77421	0.0257999	2.22484	0.00405749	0.936305	0.420842	26.1033	0.243913	25.8646	0.568178	3.70738	NA	26.1033	0.243913	704.092
21TMS009	Spot 204	392.525	13022.7	3.0431	20.0822	2.39094	0.0269239	3.4368	0.0040599	2.46558	0.717404	26.1188	0.642677	26.9765	0.914922	104.083	56.6058	26.1188	0.642677	25.0943
21TMS009	Spot 116	1058.94	502322	1.60828	20.6474	1.10165	0.0267859	1.26549	0.00406076	0.62276	0.492109	26.1244	0.162363	26.8401	0.335209	91.373	26.1113	26.1244	0.162363	28.5909
21TMS009	Spot 246	262.699	3849.67	3.20515	19.8689	2.43913	0.0257113	2.69001	0.00406413	1.11262	0.413614	26.146	0.290317	25.7769	0.684672	NA	NA	26.146	0.290317
21TMS009	Spot 191	98.115	4159.57	1.34526	20.5012	4.62052	0.0250805	6.21171	0.00406819	1.28449	0.206785	26.172	0.335496	25.1522	1.54319	NA	NA	26.172	0.335496
21TMS009	Spot 269	315.788	38317.5	1.07093	20.5526	2.23088	0.026706	2.40113	0.00406904	0.883958	0.368143	26.1775	0.230929	26.7611	0.634174	79.4608	53.041	26.1775	0.230929	32.9439
21TMS009	Spot 261	131.083	17186	1.10371	18.464	4.15236	0.0294918	4.33733	0.00406911	1.20224	0.277184	26.1779	0.314083	29.5124	1.26163	310.069	94.8999	26.1779	0.314083	8.44261
21TMS009	Spot 306	271.615	130663	1.03349	19.4547	2.80858	0.0284449	2.95227	0.00407086	0.909828	0.308179	26.1892	0.237793	28.4793	0.829105	226.194	64.9269	26.1892	0.237793	11.5782
21TMS009	Spot 14	158.74	17560.7	1.65278	19.9598	4.2476	0.0274283	4.38879	0.00407238	1.00155	0.228207	26.1989	0.261863	27.4751	1.18966	140.58	100.336	26.1989	0.261863	18.6362
21TMS009	Spot 199	198.089	6037.5	1.36491	20.6526	2.98974	0.0255185	3.96267	0.00407407	1.42218	0.358893	26.2098	0.371992	25.5859	1.00122	NA	NA	26.2098	0.371992
21TMS009	Spot 111	127.895	6817.54	1.4076	18.5152	3.62562	0.0288178	3.92839	0.00407452	1.28581	0.327313	26.2127	0.336361	28.8474	1.11729	254.13	85.4055	26.2127	0.336361	10.3147
21TMS009	Spot 150	74.0495	5971.54	1.97028	14.1148	5.5486	0.0380495	6.01544	0.00407593	2.31309	0.384526	26.2217	0.6053	37.9179	2.23887	859.519	115.338	26.2217	0.6053	3.05074
21TMS009	Spot 313	88.0287	5030.42	1.53751	19.5858	3.72917	0.0266899	3.90762	0.00407648	1.07631	0.275439	26.2253	0.281693	26.7451	1.03146	73.7049	NA	26.2253	0.281693	35.5815
21TMS009	Spot 27	1336.39	26041.5	1.37614	21.6111	1.19388	0.0254477	1.51901	0.00407656	0.931023	0.612913	26.2258	0.243672	25.5159	0.38276	NA	NA	26.2258	0.243672
21TMS009	Spot 110	158.548	15968.4	1.10607	20.8112	2.58583	0.0262104	2.91003	0.00407777	1.32895	0.456679	26.2335	0.347922	26.2708	0.754684	29.663	NA	26.2335	0.347922	88.4384
21TMS009	Spot 44	150.328	7628.54	2.40686	20.9829	3.32917	0.0254896	3.712	0.00407849	1.54534	0.41631	26.2382	0.404646	25.5574	0.936851	NA	NA	26.2382	0.404646
21TMS009	Spot 118	47.2055	36912.8	1.40665	21.6569	4.46207	0.0254531	4.80996	0.00407963	1.79564	0.373318	26.2455	0.470318	25.5212	1.21226	NA	NA	26.2455	0.470318
21TMS009	Spot 213	556.122	212452	3.08557	21.1782	1.83446	0.0262682	2.07066	0.00408696	0.960394	0.46381	26.2925	0.251998	26.328	0.538156	29.5862	NA	26.2925	0.251998	88.8677
21TMS009	Spot 117	194.931	8051.74	1.33065	18.9923	3.50565	0.0283186	3.72645	0.00408776	1.2056	0.323524	26.2977	0.316397	28.3547	1.04201	206.331	81.8182	26.2977	0.316397	12.7454
21TMS009	Spot 237	3398.07	307248	1.18696	21.2161	0.801418	0.0262212	1.15371	0.0040888	0.829913	0.719342	26.3043	0.217858	26.2814	0.299322	24.2103	19.2109	26.3043	0.217858	108.65
21TMS009	Spot 67	186.07	7824.21	1.18512	19.4465	3.43826	0.0276537	3.77575	0.00408912	1.54862	0.410149	26.3064	0.406556	27.6979	1.03167	150.114	80.7084	26.3064	0.406556	17.5242
21TMS009	Spot 174	51.5689	15898.9	1.54545	20.9902	4.38977	0.0260698	4.87693	0.00408969	2.12413	0.435547	26.3101	0.557721	26.1316	1.25816	9.72813	NA	26.3101	0.557721	270.453
21TMS009	Spot 202	86.9914	3176.43	1.52838	20.6821	4.00235	0.024356	4.83805	0.00409327	1.54659	0.319671	26.3331	0.406432	24.4343	1.16803	NA	NA	26.3331	0.406432
21TMS009	Spot 161	346.121	43254.9	3.02493	20.7932	2.07378	0.0266812	2.39944	0.00409481	1.17309	0.488901	26.3429	0.308395	26.7365	0.633153	62.271	49.8781	26.3429	0.308395	42.3037
21TMS009	Spot 71	117.727	51526.6	1.45688	20.6623	3.25754	0.0269094	3.62419	0.00409485	1.58834	0.438262	26.3432	0.417567	26.9622	0.964301	82.4595	77.3138	26.3432	0.417567	31.9468
21TMS009	Spot 303	152.462	24743.5	2.38209	19.3194	3.28823	0.028542	4.47704	0.00409548	3.03553	0.678023	26.3473	0.798148	28.5751	1.26149	220.137	76.18	26.3473	0.798148	11.9686
21TMS009	Spot 254	119.323	3867.6	1.70714	21.6314	3.24558	0.0236134	3.80551	0.00409685	1.50865	0.396439	26.356	0.396809	23.698	0.891386	NA	NA	26.356	0.396809
21TMS009	Spot 12	904.354	25673.6	1.33891	21.3611	1.42561	0.0258855	1.70155	0.00409891	0.796817	0.468288	26.3692	0.209685	25.9492	0.435946	NA	NA	26.3692	0.209685
21TMS009	Spot 13	227.581	30290.3	0.972523	13.3059	8.53756	0.0418147	8.6816	0.00409932	1.56976	0.180815	26.3719	0.41313	41.5943	3.5381	1040.91	172.642	26.3719	0.41313	2.53354
21TMS009	Spot 205	126.537	3459.49	1.52157	21.6545	3.74292	0.023417	4.47385	0.00410069	1.60817	0.359459	26.3807	0.423379	23.5031	1.03942	NA	NA	26.3807	0.423379
21TMS009	Spot 135	717.843	9412.59	2.65676	20.6613	1.7518	0.0262297	2.4004	0.00410777	0.898745	0.374415	26.4261	0.237017	26.2899	0.622963	13.8681	NA	26.4261	0.237017	190.553
21TMS009	Spot 15	238.532	179088	1.74575	22.0314	2.46189	0.0254753	2.59643	0.00411253	0.824604	0.317591	26.4567	0.217716	25.5432	0.65494	NA	NA	26.4567	0.217716
21TMS009	Spot 103	704.245	35397.2	0.752852	21.4204	1.56981	0.0259349	1.8924	0.00411548	1.04067	0.54992	26.4757	0.274959	25.9981	0.485743	NA	NA	26.4757	0.274959
21TMS009	Spot 7	454.466	11424.7	1.68301	21.4833	1.83851	0.0254301	2.31239	0.00411616	0.935057	0.404368	26.48	0.247095	25.4984	0.582282	NA	NA	26.48	0.247095
21TMS009	Spot 100	555.641	18656.6	0.694968	21.3484	1.82536	0.0258283	2.20975	0.00411772	1.04921	0.474807	26.49	0.277364	25.8926	0.56493	NA	NA	26.49	0.277364
21TMS009	Spot 266	521.446	5769.35	1.3949	17.748	2.92662	0.0301638	3.25611	0.00412115	1.12776	0.34635	26.5121	0.298377	30.1749	0.968074	332.383	69.2544	26.5121	0.298377	7.97636
21TMS009	Spot 226	68.5819	7556.24	1.49061	20.2908	4.62318	0.0265823	4.83727	0.0041238	1.41419	0.292353	26.5291	0.3744	26.6387	1.27183	36.518	NA	26.5291	0.3744	72.6466
21TMS009	Spot 106	554.447	13185.7	2.37701	15.2321	5.55255	0.036279	5.71188	0.00412478	1.03571	0.181326	26.5354	0.274265	36.1846	2.03043	734.698	119.029	26.5354	0.274265	3.61174
21TMS009	Spot 287	606.554	26610.8	0.712637	20.389	1.62321	0.0272885	1.91121	0.00413333	0.831155	0.434884	26.5903	0.220551	27.337	0.515497	93.4966	40.7741	26.5903	0.220551	28.4398
21TMS009	Spot 121	2725.31	167607	1.05654	21.2641	0.704409	0.0264603	0.908159	0.00413397	0.573112	0.63107	26.5943	0.152101	26.518	0.237708	19.6116	16.9073	26.5943	0.152101	135.605
21TMS009	Spot 197	129.514	12504.3	1.34856	22.5013	2.70538	0.024368	3.01842	0.00413399	1.31728	0.436415	26.5945	0.349604	24.4462	0.729077	NA	NA	26.5945	0.349604
21TMS009	Spot 108	74.6341	3776.72	1.40512	18.2377	4.9652	0.028751	5.18369	0.00413756	1.15736	0.22327	26.6174	0.307425	28.7815	1.471	213.384	117.096	26.6174	0.307425	12.4739
21TMS009	Spot 56	93.2391	7481.91	0.975975	20.8457	4.66246	0.0260102	5.48208	0.00413856	1.91763	0.349799	26.6238	0.509493	26.0726	1.41113	NA	NA	26.6238	0.509493
21TMS009	Spot 283	211.702	9529.09	1.74478	21.0615	2.98033	0.0258472	3.37133	0.00413872	1.42665	0.423171	26.6248	0.37906	25.9114	0.862507	NA	NA	26.6248	0.37906
21TMS009	Spot 54	171.014	14011.2	1.19813	19.2641	3.39499	0.0287452	3.68295	0.00413936	1.35656	0.368335	26.629	0.360493	28.7758	1.04492	211.865	79.3645	26.629	0.360493	12.5688
21TMS009	Spot 285	109.506	5638.72	1.92167	20.1646	3.50232	0.0264505	3.72112	0.00413995	1.18704	0.319	26.6327	0.315489	26.5083	0.973642	15.2361	NA	26.6327	0.315489	174.8
21TMS009	Spot 39	247.93	4968.32	2.13804	22.233	2.06583	0.023761	4.21046	0.004141	0.833438	0.197945	26.6395	0.221565	23.8443	0.992259	NA	NA	26.6395	0.221565
21TMS009	Spot 107	877.141	86945.4	2.01773	20.9234	1.05427	0.0269099	1.32809	0.00414202	0.806432	0.607213	26.646	0.214439	26.9626	0.353375	55.2945	25.1658	26.646	0.214439	48.1893
21TMS009	Spot 74	93.7273	7863.29	1.46303	18.5443	3.58396	0.0294323	3.81173	0.00414226	1.29487	0.339705	26.6475	0.344338	29.4537	1.10657	264.732	82.3051	26.6475	0.344338	10.0659
21TMS009	Spot 198	171.884	5360.39	1.10152	20.1025	3.38558	0.0265265	4.64287	0.00414267	1.20455	0.259441	26.6502	0.320352	26.5835	1.21822	20.5723	NA	26.6502	0.320352	129.544
21TMS009	Spot 173	404.915	24072.7	2.00322	21.1382	2.09153	0.0263888	2.258	0.00414273	0.847532	0.375346	26.6506	0.225406	26.4473	0.589471	7.99405	NA	26.6506	0.225406	333.38
21TMS009	Spot 51	108.044	17877.1	1.24886	20.3704	3.85969	0.0273286	4.04566	0.0041446	1.21219	0.299627	26.6626	0.322533	27.3766	1.09277	90.4996	91.4714	26.6626	0.322533	29.4616
21TMS009	Spot 40	749.336	8269.7	2.10441	19.6618	1.40691	0.0278049	1.68265	0.00414534	0.909565	0.540555	26.6673	0.242056	27.8472	0.462204	130.897	33.2738	26.6673	0.242056	20.3728
21TMS009	Spot 45	311.171	13067.8	2.52443	19.9083	3.09847	0.0278389	3.33827	0.00414728	1.22803	0.367865	26.6798	0.32696	27.8808	0.918074	132.62	73.0067	26.6798	0.32696	20.1176
21TMS009	Spot 282	76.9694	38169.6	3.0657	19.1345	4.4702	0.0293313	4.71998	0.00415475	1.51506	0.320989	26.7277	0.404103	29.3541	1.36567	249.907	102.913	26.7277	0.404103	10.6951
21TMS009	Spot 230	629.049	20781.3	2.45959	20.9339	1.53306	0.0266424	1.76056	0.00415486	0.84933	0.482421	26.7285	0.226543	26.6981	0.46391	23.9764	NA	26.7285	0.226543	111.478
21TMS009	Spot 16	447.373	25795.3	2.14211	21.6814	2.56692	0.0258811	2.88532	0.00415589	1.31661	0.456314	26.7351	0.351268	25.9449	0.73911	NA	NA	26.7351	0.351268
21TMS009	Spot 69	421.382	15885.1	1.00945	20.3074	1.95079	0.0274706	2.35068	0.00416452	0.971111	0.413118	26.7905	0.259625	27.5169	0.63815	91.3986	50.7244	26.7905	0.259625	29.3117
21TMS009	Spot 5	755.744	78233.7	1.07883	20.335	1.82288	0.0278919	2.02377	0.00417024	0.879023	0.43435	26.8272	0.235327	27.9332	0.557599	124.112	42.9307	26.8272	0.235327	21.6153
21TMS009	Spot 20	200.038	6144.92	1.79337	20.6329	3.03906	0.0262509	3.45647	0.00417077	1.22981	0.355799	26.8306	0.32928	26.3109	0.897746	NA	NA	26.8306	0.32928
21TMS009	Spot 265	132.496	7920.02	1.51458	22.2432	3.34338	0.0244451	4.27506	0.00417106	2.5641	0.59978	26.8325	0.68658	24.5226	1.0358	NA	NA	26.8325	0.68658
21TMS009	Spot 149	34.7951	30527.5	2.72558	18.0693	5.72284	0.0312877	6.01289	0.00418095	1.84497	0.306836	26.8959	0.49519	31.2821	1.85228	382.44	128.704	26.8959	0.49519	7.03273
21TMS009	Spot 85	119.423	17273.4	1.58417	21.7943	3.70038	0.0257279	3.93099	0.00418225	1.32295	0.336544	26.9043	0.355189	25.7933	1.00116	NA	NA	26.9043	0.355189
21TMS009	Spot 79	211.1	20345.8	1.22225	20.4414	2.94921	0.0275593	3.13962	0.00418627	1.07304	0.341775	26.9301	0.288369	27.6046	0.855005	86.7423	69.9916	26.9301	0.288369	31.0461
21TMS009	Spot 215	222.747	3788.46	1.26771	18.4762	2.66006	0.0286881	2.92136	0.00419039	1.1676	0.399676	26.9566	0.314088	28.7194	0.827244	178.759	62.4413	26.9566	0.314088	15.0799
21TMS009	Spot 147	334.044	10288.5	1.72642	19.1766	3.31764	0.0290317	3.53028	0.00419622	1.18807	0.336538	26.994	0.320038	29.0585	1.01131	203.223	77.172	26.994	0.320038	13.2829
21TMS009	Spot 61	149.099	32939.9	1.89787	20.057	3.35837	0.0283285	3.54669	0.00419838	1.12643	0.317602	27.0078	0.303589	28.3644	0.992075	144.806	78.9244	27.0078	0.303589	18.6511
21TMS009	Spot 75	96.4484	5406.64	1.49338	19.9997	4.24795	0.0270887	4.45285	0.00419872	1.22804	0.275786	27.01	0.330999	27.1394	1.19247	38.5891	NA	27.01	0.330999	69.9938
21TMS009	Spot 133	947.782	129286	0.592882	21.1062	1.4017	0.0270801	1.58607	0.00420121	0.742184	0.467939	27.026	0.200163	27.1309	0.424617	36.4131	33.5509	27.026	0.200163	74.2205
21TMS009	Spot 3	162.425	186919	1.7175	18.6227	4.37594	0.03076	4.55688	0.00420655	1.27132	0.278989	27.0603	0.343301	30.7624	1.38078	330.297	99.3034	27.0603	0.343301	8.19271
21TMS009	Spot 233	75.1099	5313.36	1.35787	17.0535	4.99261	0.0321609	5.25484	0.00422459	1.53141	0.291429	27.1761	0.415302	32.1416	1.66254	420.846	112.281	27.1761	0.415302	6.45749
21TMS009	Spot 17	453.55	30880.8	2.21743	21.5731	1.91153	0.0265344	2.10463	0.00423051	0.877541	0.416958	27.2141	0.238311	26.5914	0.552384	NA	NA	27.2141	0.238311
21TMS009	Spot 140	212.188	5708.79	1.64549	19.9557	2.89505	0.0275642	5.03839	0.00425185	3.09298	0.613883	27.3511	0.844172	27.6095	1.37233	50.1466	NA	27.3511	0.844172	54.5422
21TMS009	Spot 31	138.978	3921.54	1.01146	20.1813	3.66828	0.0266659	5.29145	0.00426337	3.7272	0.704381	27.4251	1.02002	26.7214	1.39551	NA	NA	27.4251	1.02002
21TMS009	Spot 212	184.929	72943	1.08468	22.1436	2.75725	0.0262258	6.5766	0.0042798	5.97067	0.907866	27.5305	1.64025	26.2861	1.70655	NA	NA	27.5305	1.64025
21TMS009	Spot 262	435.538	5088.58	3.06944	12.2122	7.76669	0.0461453	7.94268	0.00429076	1.00785	0.126891	27.6008	0.277581	45.8062	3.55741	1146.84	156.738	27.6008	0.277581	2.40668
21TMS009	Spot 2	61.3145	3544.15	1.3239	13.3649	5.31039	0.0414302	5.48181	0.00429225	1.35433	0.24706	27.6104	0.373137	41.2194	2.21432	928.486	109.121	27.6104	0.373137	2.97371
21TMS009	Spot 312	3136.94	114058	1.81163	21.7213	1.41221	0.0271462	3.12346	0.0043462	2.78517	0.891693	27.9567	0.776955	27.1963	0.83819	NA	NA	27.9567	0.776955
21TMS009	Spot 77	115.752	5266.23	1.46721	11.0669	12.1844	0.0526974	12.4519	0.00439911	2.5593	0.205535	28.2963	0.722598	52.1458	6.32931	1357.83	235.777	28.2963	0.722598	2.08393
21TMS009	Spot 185	869.124	6829.05	2.20503	10.1938	10.8537	0.0577983	10.9258	0.00441243	0.970838	0.0888577	28.3818	0.274935	57.054	6.06175	1528.11	205.601	28.3818	0.274935	1.85731
21TMS009	Spot 52	143.841	7214.92	1.13966	21.5008	2.99714	0.0268447	3.99825	0.00442024	1.28216	0.320681	28.4319	0.36374	26.8982	1.06134	NA	NA	28.4319	0.36374
21TMS009	Spot 263	219.093	6521.91	1.13681	5.42833	23.3604	0.12333	23.9641	0.0049697	5.34412	0.223005	31.9574	1.70361	118.087	26.721	2652.73	393.471	31.9574	1.70361	1.2047
21TMS009	Spot 194	139.963	65678.1	1.4237	20.8636	1.6736	0.0873843	1.97243	0.0134421	1.04367	0.529127	86.076	0.892376	85.0638	1.60947	56.7678	39.9152	86.076	0.892376	151.628
21TMS009	Spot 167	100.155	4351.57	1.45121	20.7328	2.43527	0.0857762	2.67219	0.0140253	1.09459	0.409622	89.7846	0.975958	83.5611	2.1435	NA	NA	89.7846	0.975958
21TMS009	Spot 268	1218.81	61185.5	2.38415	19.1716	0.985706	0.108405	1.15354	0.0153558	0.593676	0.514655	98.2376	0.578792	104.505	1.14555	249.847	22.7457	98.2376	0.578792	39.3191
21TMS009	Spot 19	151.74	162437	2.98045	19.8182	1.69549	0.159699	1.83069	0.0232017	0.690444	0.377149	147.859	1.00926	150.439	2.55978	191.327	39.4195	147.859	1.00926	77.2807
21TMS009	Spot 78	154.724	16062.4	2.09189	20.165	1.39299	0.15644	1.5853	0.0235294	0.705629	0.445108	149.923	1.04569	147.583	2.17754	110.154	33.526	149.923	1.04569	136.103
21TMS009	Spot 216	209.912	107018	0.7291	20.0356	1.20609	0.159917	1.40802	0.0235763	0.725836	0.515502	150.219	1.07773	150.63	1.97109	157.104	28.2176	150.219	1.07773	95.6171
21TMS009	Spot 309	900.495	189219	1.11683	20.2108	0.638253	0.168504	0.909366	0.025037	0.647369	0.711891	159.412	1.01933	158.119	1.33152	138.78	14.9987	159.412	1.01933	114.867
21TMS009	Spot 60	64.9151	132191	1.38041	20.3592	2.14351	0.167928	2.27198	0.025082	0.753145	0.331493	159.695	1.18796	157.619	3.31698	126.558	50.4609	159.695	1.18796	126.183
21TMS009	Spot 281	370.12	260009	0.467032	19.9639	1.07256	0.172431	1.40291	0.0253242	0.904214	0.644528	161.217	1.43967	161.526	2.09502	166.036	25.0835	161.217	1.43967	97.0976
21TMS009	Spot 157	114.981	19562.6	1.37306	19.3686	1.33624	0.17668	1.6577	0.0254512	0.973239	0.587103	162.016	1.55715	165.199	2.52735	211.067	31.101	162.016	1.55715	76.7603
21TMS009	Spot 222	111.659	87218.1	0.764296	20.2792	1.44755	0.170978	1.63879	0.0255474	0.768042	0.468665	162.621	1.23337	160.267	2.42965	125.603	34.0615	162.621	1.23337	129.471
21TMS009	Spot 29	328.091	161376	1.81664	20.0244	0.835137	0.177008	1.16904	0.0259881	0.817554	0.699338	165.39	1.33496	165.483	1.78515	166.787	19.5095	165.39	1.33496	99.1625
21TMS009	Spot 295	384.486	35544	1.84599	20.4594	0.712467	0.172141	1.0183	0.0260927	0.72735	0.714276	166.047	1.19232	161.276	1.51849	91.762	16.8877	166.047	1.19232	180.955
21TMS009	Spot 97	132.201	7223.52	1.05951	19.339	1.32204	0.178119	1.57485	0.0263249	0.855014	0.542918	167.506	1.41375	166.44	2.41763	151.334	30.9864	167.506	1.41375	110.686
21TMS009	Spot 80	507.452	510255	1.69332	19.9639	0.854147	0.180574	1.18567	0.0264063	0.822343	0.693568	168.018	1.36383	168.554	1.84143	176.072	19.9332	168.018	1.36383	95.4253
21TMS009	Spot 296	840.83	107958	0.875752	17.5229	0.817818	0.207953	1.16701	0.0268314	0.832264	0.713158	170.687	1.40192	191.834	2.03996	460.69	18.1379	170.687	1.40192	37.0503
21TMS009	Spot 278	869.067	40759.7	0.904384	18.23	1.40273	0.199271	1.60063	0.0268916	0.756028	0.472333	171.064	1.27629	184.509	2.70052	360.299	31.8127	171.064	1.27629	47.4784
21TMS009	Spot 83	552.279	110400	0.857486	20.1895	0.589056	0.181546	0.937148	0.0268996	0.727274	0.77605	171.115	1.2281	169.39	1.46209	145.336	13.8671	171.115	1.2281	117.738
21TMS009	Spot 232	592.508	170057	1.41421	19.9298	0.625897	0.186771	1.08989	0.027364	0.891919	0.818361	174.029	1.53144	173.87	1.74162	171.682	14.6154	174.029	1.53144	101.368
21TMS009	Spot 166	65.7568	26150	1.81093	19.5944	1.77312	0.188944	1.97836	0.0274396	0.830184	0.419631	174.504	1.42927	175.728	3.19235	192.254	41.7635	174.504	1.42927	90.7672
21TMS009	Spot 46	101.479	42390.6	1.71735	19.761	1.76051	0.188828	2.0138	0.0274914	0.965584	0.479482	174.829	1.66543	175.629	3.24785	186.393	41.1363	174.829	1.66543	93.7957
21TMS009	Spot 163	345.554	46928.2	1.2731	19.8365	0.904673	0.188318	1.17284	0.0275487	0.739562	0.630574	175.188	1.27818	175.193	1.88724	175.243	21.2355	175.188	1.27818	99.9685
21TMS009	Spot 70	273.079	467150	1.77509	20.2693	0.715726	0.185682	1.02742	0.027584	0.737091	0.717423	175.41	1.2755	172.938	1.63372	139.263	16.824	175.41	1.2755	125.956
21TMS009	Spot 145	73.2969	18558.2	2.26524	20.2843	2.07236	0.182685	2.34143	0.027609	0.969746	0.414168	175.566	1.67957	170.369	3.67238	98.7648	50.4328	175.566	1.67957	177.762
21TMS009	Spot 286	258.677	42940.1	2.81028	20.0238	0.993919	0.18741	1.25254	0.0277532	0.758815	0.60582	176.471	1.32093	174.417	2.00731	146.672	23.3709	176.471	1.32093	120.317
21TMS009	Spot 277	261.815	49543.7	2.11616	20.0188	1.04356	0.187508	1.25615	0.0277774	0.695365	0.553567	176.623	1.2115	174.501	2.01399	145.859	24.5358	176.623	1.2115	121.091
21TMS009	Spot 164	118.478	46370.5	1.7043	20.0548	1.34601	0.187891	1.55753	0.0277973	0.781567	0.501799	176.748	1.36264	174.828	2.50148	148.925	31.5712	176.748	1.36264	118.683
21TMS009	Spot 86	155.428	61920.6	1.87823	20.3589	1.02798	0.185885	1.25141	0.0278729	0.710427	0.567702	177.222	1.24188	173.112	1.99173	117.336	24.3136	177.222	1.24188	151.038
21TMS009	Spot 201	440.991	43752	0.927951	19.9702	0.762559	0.188897	1.26779	0.0278774	1.01178	0.798065	177.25	1.76895	175.688	2.04531	154.74	17.8663	177.25	1.76895	114.547
21TMS009	Spot 208	229.509	67321.8	1.62007	19.9433	1.56044	0.189979	1.79817	0.0279195	0.893186	0.496719	177.514	1.5639	176.611	2.91493	164.525	36.4716	177.514	1.5639	107.895
21TMS009	Spot 301	372.281	17145.7	1.29164	16.1964	2.21244	0.231835	2.43452	0.027951	0.993913	0.408259	177.712	1.74218	211.713	4.65236	609.177	48.0568	177.712	1.74218	29.1724
21TMS009	Spot 298	90.8144	47961	1.29178	19.8331	1.32038	0.191077	1.54394	0.0280085	0.799865	0.518067	178.072	1.40484	177.548	2.51495	170.546	30.8454	178.072	1.40484	104.413
21TMS009	Spot 186	328.382	290989	1.70881	20.0214	0.849453	0.19181	1.32777	0.0281935	1.02043	0.768524	179.232	1.80374	178.173	2.1698	164.119	19.8595	179.232	1.80374	109.208
21TMS009	Spot 292	95.533	9175.14	1.53257	20.3193	1.75059	0.184253	1.95284	0.0284382	0.83132	0.425699	180.766	1.48187	171.714	3.08509	48.7319	42.213	180.766	1.48187	370.94
21TMS009	Spot 41	242.748	47494.4	2.11112	20.1809	1.06872	0.194618	1.66756	0.0289178	1.27095	0.762161	183.771	2.30267	180.562	2.75846	138.733	25.3435	183.771	2.30267	132.464
21TMS009	Spot 22	279.464	35721.3	1.11273	20.6349	1.64802	0.189941	4.23054	0.0289273	3.87776	0.916612	183.831	7.02786	176.579	6.85687	80.5234	40.1546	183.831	7.02786	228.295
21TMS009	Spot 245	1265.07	670363	3.46445	19.6716	0.51401	0.230411	0.815493	0.0333202	0.633098	0.776337	211.295	1.31602	210.538	1.55062	202.087	11.9328	211.295	1.31602	104.556
21TMS009	Spot 58	867.75	162945	2.93488	19.8285	0.632042	0.229608	0.999254	0.0333774	0.773218	0.773795	211.652	1.60995	209.875	1.89464	189.997	14.7482	211.652	1.60995	111.398
21TMS009	Spot 62	977.144	159278	3.39309	19.6195	0.512206	0.232766	0.890912	0.0335021	0.728376	0.817562	212.429	1.52207	212.48	1.70807	213.062	11.8869	212.429	1.52207	99.7033
21TMS009	Spot 184	799.735	170395	3.19863	19.78	0.565347	0.231118	0.826538	0.0335768	0.602351	0.728764	212.896	1.26144	211.121	1.57553	191.386	13.1872	212.896	1.26144	111.239
21TMS009	Spot 152	565.154	142902	3.17656	19.854	0.741586	0.231865	1.02695	0.0338184	0.709314	0.690703	214.402	1.49577	211.737	1.96268	182.169	17.315	214.402	1.49577	117.694
21TMS009	Spot 84	1576.26	405232	2.71898	19.395	0.466331	0.243348	0.820905	0.034569	0.675543	0.822925	219.081	1.45512	221.158	1.63139	243.338	10.7501	219.081	1.45512	90.0316
21TMS009	Spot 65	491.194	88684	1.47169	19.3428	0.721486	0.255526	1.0065	0.0363227	0.701682	0.69715	229.999	1.58541	231.055	2.07995	241.822	16.6307	229.999	1.58541	95.1108
21TMS009	Spot 88	1035.02	71268.9	1.17616	18.5025	0.883838	0.270726	1.29808	0.0368728	0.946197	0.728922	233.42	2.1691	243.274	2.80808	339.503	20.1037	233.42	2.1691	68.7534
21TMS009	Spot 50	106.638	14125	1.60613	7.93655	15.0417	0.830898	16.0125	0.0485961	5.49069	0.3429	305.897	16.4036	614.11	73.9161	2014.64	268.355	305.897	16.4036	15.1837
21TMS009	Spot 112	9.76684	4041.36	3.69176	4.929	5.62555	1.44354	7.55987	0.0529703	5.05021	0.668028	332.732	16.3774	907.193	45.3778	2806.87	92.0555	332.732	16.3774	11.8542
21TMS009	Spot 9	88.3855	115985	1.42331	16.8318	0.827931	0.806512	1.06607	0.0995667	0.67158	0.62996	611.869	3.9202	600.496	4.83268	557.769	18.0545	611.869	3.9202	109.699
21TMS009	Spot 23	203.527	186351	3.91723	13.6093	0.43027	1.75768	0.804938	0.175227	0.680111	0.844924	1040.84	6.53697	1029.99	5.20945	1007	8.73511	1007	8.73511	103.361
21TMS009	Spot 172	40.8211	24420.3	1.75617	13.1849	1.044	1.9012	1.23777	0.185166	0.664791	0.537086	1095.14	6.69554	1081.51	8.23627	1054.17	21.0358	1054.17	21.0358	103.886
21TMS009	Spot 258	42.2483	47736.3	1.13507	13.176	0.856195	1.87854	1.10236	0.182744	0.692185	0.627912	1081.95	6.89435	1073.55	7.3048	1056.54	17.2943	1056.54	17.2943	102.405
21TMS009	Spot 220	69.983	44745.5	2.04736	13.1455	0.600711	1.93601	0.891718	0.187657	0.658941	0.738957	1108.67	6.71179	1093.62	5.97052	1063.79	12.0747	1063.79	12.0747	104.218
21TMS009	Spot 257	49.4905	29998.3	2.10913	13.0548	0.702727	1.93473	1.15482	0.186817	0.916352	0.793504	1104.11	9.2985	1093.18	7.73043	1071.49	14.1192	1071.49	14.1192	103.044
21TMS009	Spot 153	312.86	174772	2.58168	13.1255	0.394223	1.90783	0.817253	0.183781	0.715876	0.875954	1087.6	7.16448	1083.83	5.44454	1076.23	7.89548	1076.23	7.89548	101.056
21TMS009	Spot 63	55.4048	83912.9	2.15834	13.118	0.756259	1.93486	0.978174	0.186223	0.617748	0.631532	1100.88	6.25169	1093.22	6.54808	1078.01	15.2225	1078.01	15.2225	102.122
21TMS009	Spot 113	89.7636	65196.5	2.15261	13.0608	0.538511	1.95212	0.878521	0.187577	0.693883	0.78983	1108.24	7.06518	1099.18	5.89874	1081.26	10.8087	1081.26	10.8087	102.495
21TMS009	xx	194.075	252404	1.87629	13.0748	0.532466	1.78522	0.856058	0.171456	0.670262	0.782963	1020.13	6.32398	1040.08	5.57147	1082.28	10.6807	1082.28	10.6807	94.2578
21TMS009	Spot 148	70.618	139230	2.33627	13.0581	0.811401	1.95652	1.05849	0.187534	0.679224	0.641692	1108	6.91456	1100.69	7.11258	1086.27	16.2556	1086.27	16.2556	102
21TMS009	Spot 210	47.8871	106769	1.85189	12.8303	0.838656	1.95876	1.15058	0.184691	0.787483	0.684422	1092.55	7.91408	1101.46	7.7344	1119.11	16.7424	1119.11	16.7424	97.6268
21TMS009	Spot 144	122.355	137618	2.05224	12.8192	0.60632	1.91223	1.13836	0.179933	0.963118	0.84606	1066.61	9.46786	1085.36	7.58981	1123.22	12.1165	1123.22	12.1165	94.9603
21TMS009	Spot 142	23.5043	50819.6	1.02155	12.7354	1.70479	1.96242	1.89309	0.18386	0.817368	0.431763	1088.03	8.18318	1102.71	12.7341	1131.79	34.0011	1131.79	34.0011	96.1332
21TMS009	Spot 33	31.4066	28490.6	1.84346	12.5093	1.24269	1.95949	1.47078	0.180651	0.783488	0.532701	1070.53	7.72804	1101.71	9.88824	1163.8	24.649	1163.8	24.649	91.9859
21TMS009	Spot 129	78.2388	57886.8	1.97218	12.4419	0.718982	2.05765	1.00512	0.188202	0.698538	0.69498	1111.63	7.1325	1134.84	6.86813	1179.54	14.2898	1179.54	14.2898	94.2425
21TMS009	Spot 214	97.666	920666	1.38235	12.0976	0.564985	2.34161	0.996608	0.20791	0.820986	0.823781	1217.67	9.10951	1225.01	7.0912	1237.95	11.0582	1237.95	11.0582	98.3618
21TMS009	Spot 284	67.917	404031	1.56178	11.4678	0.602215	2.82955	0.859671	0.238624	0.613485	0.713627	1379.54	7.61898	1363.4	6.44967	1338.18	11.6404	1338.18	11.6404	103.091
21TMS009	Spot 228	100.789	176966	1.41797	11.4494	0.702299	2.81525	0.883235	0.236786	0.535252	0.606013	1369.97	6.60599	1359.6	6.61768	1343.33	13.5704	1343.33	13.5704	101.983
21TMS009	Spot 21	24.8429	182615	1.40299	11.4444	0.594123	2.81077	0.964353	0.235598	0.759541	0.787617	1363.77	9.33607	1358.41	7.22247	1349.97	11.467	1349.97	11.467	101.023
21TMS009	Spot 28	150.093	384292	2.71513	11.4092	0.517622	2.80148	0.802542	0.234111	0.613299	0.764195	1356.01	7.49995	1355.93	6.00534	1355.79	9.98152	1355.79	9.98152	100.016
21TMS009	Spot 181	105.4	266778	1.23008	11.3801	0.580865	2.79769	0.87587	0.233527	0.655492	0.748389	1352.96	7.9997	1354.92	6.55173	1358	11.1987	1358	11.1987	99.6283
21TMS009	Spot 138	51.6231	31731.5	1.20586	11.3039	0.531265	2.6986	0.705397	0.224831	0.463904	0.65765	1307.35	5.48943	1328.08	5.22599	1361.64	10.2388	1361.64	10.2388	96.013
21TMS009	Spot 134	121.797	179438	1.91377	11.3449	0.454129	2.8632	0.871792	0.238431	0.744095	0.853524	1378.53	9.235	1372.29	6.56075	1362.56	8.7515	1362.56	8.7515	101.172
21TMS009	Spot 34	55.7342	68698.7	1.79804	11.3293	0.696716	2.97038	1.00201	0.247046	0.717994	0.716556	1423.22	9.16927	1400.07	7.61183	1364.98	13.4603	1364.98	13.4603	104.267
21TMS009	Spot 253	108.256	3.58141e+06	1.88946	11.2795	0.542278	2.81709	0.955459	0.233672	0.786662	0.823334	1353.72	9.60537	1360.09	7.16008	1370.11	10.4364	1370.11	10.4364	98.8033
21TMS009	Spot 211	161.929	1.92493e+06	2.78944	11.2746	0.452873	2.869	1.00314	0.237331	0.895093	0.892293	1372.81	11.0677	1373.81	7.55319	1375.35	8.70834	1375.35	8.70834	99.815
21TMS009	Spot 209	121.304	176416	1.7331	11.253	0.504872	2.83477	0.926904	0.234239	0.777319	0.838619	1356.68	9.50995	1364.79	6.95745	1377.49	9.70598	1377.49	9.70598	98.4895
21TMS009	Spot 305	111.342	441068	1.44588	11.108	0.436579	3.03862	0.698392	0.247839	0.545113	0.780526	1427.32	6.97937	1417.38	5.33552	1402.44	8.36409	1402.44	8.36409	101.774
21TMS009	Spot 252	84.5123	238195	2.32247	11.0879	0.550738	3.03292	0.852183	0.247268	0.650249	0.763039	1424.37	8.31009	1415.94	6.50744	1403.27	10.5514	1403.27	10.5514	101.504
21TMS009	Spot 143	136.356	881696	3.11899	11.091	0.381766	3.07211	0.834785	0.249817	0.742374	0.8893	1437.53	9.56572	1425.76	6.39481	1408.21	7.30821	1408.21	7.30821	102.082
21TMS009	Spot 11	117.729	221227	3.03048	11.0974	0.484334	3.04849	0.742615	0.247867	0.562847	0.757926	1427.46	7.20708	1419.85	5.67793	1408.44	9.27337	1408.44	9.27337	101.351
21TMS009	Spot 4	39.6977	129298	2.44517	11.0582	0.736979	3.0566	1.02561	0.248145	0.713204	0.695395	1428.9	9.14055	1421.89	7.84688	1411.38	14.1031	1411.38	14.1031	101.242
21TMS009	Spot 299	112.757	367994	3.50699	11.0271	0.549649	3.02311	0.757651	0.244985	0.521443	0.688236	1412.56	6.61454	1413.47	5.7809	1414.82	10.5129	1414.82	10.5129	99.8399
21TMS009	Spot 57	130.203	293428	2.08633	11.0659	0.564836	3.05946	0.945578	0.24789	0.758309	0.801953	1427.58	9.71063	1422.6	7.23621	1415.13	10.8033	1415.13	10.8033	100.88
21TMS009	Spot 196	94.4655	349955	2.73129	11.0268	0.631804	2.99522	0.878852	0.242463	0.610905	0.695116	1399.49	7.68518	1406.4	6.69021	1416.88	12.0805	1416.88	12.0805	98.7724
21TMS009	Spot 151	141.185	355350	2.00672	11.0364	0.562837	3.05619	0.852822	0.247388	0.640702	0.751273	1424.99	8.19128	1421.78	6.52464	1416.97	10.762	1416.97	10.762	100.566
21TMS009	Spot 304	106.94	204623	3.24194	11.0168	0.508622	3.07908	0.841951	0.249237	0.670939	0.796886	1434.54	8.62917	1427.5	6.45329	1417	9.7255	1417	9.7255	101.238
21TMS009	Spot 26	110.847	173817	1.01254	11.0155	0.463391	3.09796	0.72156	0.250069	0.552944	0.766317	1438.83	7.13059	1432.19	5.53879	1422.31	8.8573	1422.31	8.8573	101.162
21TMS009	Spot 249	175.954	866713	3.55626	10.9639	0.467524	3.1025	0.832042	0.249883	0.688269	0.827205	1437.87	8.87042	1433.31	6.38917	1426.53	8.92765	1426.53	8.92765	100.795
21TMS009	Spot 136	72.2806	131121	2.19436	10.9645	0.57532	3.10331	0.853699	0.249829	0.630369	0.738398	1437.59	8.1228	1433.51	6.55589	1427.44	10.9921	1427.44	10.9921	100.712
21TMS009	Spot 94	107.418	242617	1.36933	10.9509	0.460372	3.06292	0.790759	0.246349	0.642871	0.81298	1419.62	8.19131	1423.47	6.05308	1429.21	8.78941	1429.21	8.78941	99.3291
21TMS009	Spot 187	63.3735	9.96237e+06	2.12563	10.9395	0.55097	3.13538	0.916403	0.251556	0.732275	0.799075	1446.5	9.48805	1441.42	7.05502	1433.91	10.5106	1433.91	10.5106	100.878
21TMS009	Spot 219	150.281	1.06128e+06	4.88219	10.9248	0.5501	3.08757	0.900155	0.247719	0.712509	0.79154	1426.7	9.11909	1429.61	6.90408	1433.93	10.494	1433.93	10.494	99.4961
21TMS009	Spot 37	143.24	640194	1.19997	10.936	0.46477	3.04196	1.10729	0.243525	1.00503	0.907647	1405	12.6879	1418.22	8.46184	1438.1	8.86117	1438.1	8.86117	97.6981
21TMS009	Spot 160	156.02	236630	2.04222	10.9113	0.409327	3.07825	0.852417	0.246305	0.747674	0.877122	1419.39	9.52533	1427.29	6.53308	1439.07	7.80424	1439.07	7.80424	98.6328
21TMS009	Spot 168	105.626	549830	1.62525	10.8829	0.42863	3.12704	0.788081	0.249572	0.66132	0.839153	1436.27	8.51461	1439.37	6.06318	1443.93	8.16576	1443.93	8.16576	99.4694
21TMS009	Spot 82	102.299	181978	1.87603	10.8502	0.444004	3.1557	0.826936	0.250981	0.697575	0.843566	1443.53	9.02192	1446.39	6.37615	1450.58	8.45255	1450.58	8.45255	99.5138
21TMS009	Spot 30	110.715	2.06754e+06	1.51599	10.8415	0.588772	3.18686	0.952864	0.25288	0.749198	0.786259	1453.31	9.7481	1453.98	7.3645	1454.94	11.1999	1454.94	11.1999	99.8881
21TMS009	Spot 188	105.592	84467.2	2.79398	10.6944	1.03431	2.84366	1.25624	0.223429	0.712358	0.567056	1299.97	8.38643	1367.14	9.43729	1473.7	19.634	1473.7	19.634	88.2109
21TMS009	Spot 276	137.45	368165	1.94637	10.4895	0.559423	3.27589	0.84528	0.252872	0.633674	0.749661	1453.27	8.24477	1475.34	6.57566	1507.22	10.5674	1507.22	10.5674	96.4205
21TMS009	Spot 125	62.1224	133687	2.10388	10.318	0.660752	3.58218	0.963059	0.271165	0.700303	0.727165	1546.71	9.6302	1545.59	7.6448	1544.04	12.4274	1544.04	12.4274	100.173
21TMS009	Spot 189	40.4794	13594.9	0.700749	9.88251	2.78834	3.25678	2.97931	0.238368	1.04452	0.35059	1378.21	12.9608	1470.8	23.1488	1607.09	52.0262	1607.09	52.0262	85.758
21TMS009	Spot 124	86.1857	184295	2.02641	9.91305	0.47152	3.96055	0.822057	0.288002	0.673345	0.819097	1631.54	9.70589	1626.15	6.66444	1619.18	8.77647	1619.18	8.77647	100.763
21TMS009	Spot 242	118.007	259916	1.4052	9.79699	0.524205	4.00085	0.818585	0.288145	0.628679	0.768007	1632.25	9.06553	1634.37	6.6498	1637.08	9.73627	1637.08	9.73627	99.7052
21TMS009	Spot 120	131.86	200325	1.57858	9.77838	0.516446	4.05242	1.30604	0.290793	1.19955	0.918464	1645.49	17.4207	1644.79	10.637	1643.87	9.58468	1643.87	9.58468	100.098
21TMS009	Spot 244	154.265	1.40838e+06	11.6277	9.72879	0.446008	4.02741	0.835668	0.287948	0.706695	0.845665	1631.27	10.1851	1639.75	6.79754	1650.62	8.26865	1650.62	8.26865	98.8272
21TMS009	Spot 243	103.959	199861	3.63099	9.64991	0.558187	4.03576	0.734909	0.286367	0.478004	0.650427	1623.35	6.85974	1641.43	5.98038	1664.65	10.3287	1664.65	10.3287	97.5187
21TMS009	Spot 68	77.0982	461250	3.72749	9.66885	0.432875	4.25629	0.806798	0.30151	0.680837	0.843876	1698.79	10.1675	1684.95	6.63366	1667.75	8.00603	1667.75	8.00603	101.861
21TMS009	Spot 18	86.1219	359752	1.80194	9.67882	0.548939	4.13099	0.880666	0.292544	0.688642	0.781956	1654.23	10.0475	1660.45	7.19948	1668.32	10.1525	1668.32	10.1525	99.1557
21TMS009	Spot 105	80.9253	2.09426e+07	4.2082	9.64271	0.533786	4.17706	0.973798	0.295627	0.814467	0.836381	1669.59	11.98	1669.53	7.97803	1669.44	9.87058	1669.44	9.87058	100.009
21TMS009	Spot 8	127.006	334199	2.55506	9.61479	0.556928	4.24764	0.924237	0.299247	0.737583	0.798045	1687.57	10.9513	1683.28	7.59635	1677.92	10.2895	1677.92	10.2895	100.575
21TMS009	Spot 260	92.0687	128775	2.35049	9.56867	0.447142	4.22212	0.754992	0.297439	0.608059	0.805384	1678.6	8.98617	1678.33	6.19814	1677.98	8.26787	1677.98	8.26787	100.037
21TMS009	Spot 178	130.654	274582	2.10931	9.53561	0.427055	4.31721	0.730174	0.301807	0.592216	0.811062	1700.27	8.85079	1696.65	6.01979	1692.18	7.87674	1692.18	7.87674	100.478
21TMS009	Spot 300	135.774	241469	2.32589	9.50606	0.434142	4.39617	0.91925	0.306987	0.810234	0.881407	1725.86	12.2681	1711.62	7.60432	1694.22	8.00543	1694.22	8.00543	101.867
21TMS009	Spot 217	106.455	1.18719e+06	1.58826	9.50617	0.599818	4.40632	0.897827	0.307404	0.668065	0.744092	1727.92	10.126	1713.53	7.43027	1695.97	11.0545	1695.97	11.0545	101.884
21TMS009	Spot 128	109.232	171826	1.83414	9.499	0.475038	4.29494	0.799051	0.299384	0.642366	0.80391	1688.25	9.54096	1692.39	6.58123	1697.51	8.75637	1697.51	8.75637	99.4549
21TMS009	Spot 156	116.856	102592	2.57699	9.45539	0.503783	4.3481	0.916021	0.301708	0.764568	0.834662	1699.78	11.4237	1702.53	7.56212	1705.92	9.28604	1705.92	9.28604	99.6401
21TMS009	Spot 225	173.093	379877	4.1246	9.39871	0.525282	4.48084	0.823861	0.309312	0.634675	0.770367	1737.32	9.66549	1727.43	6.83916	1715.45	9.65882	1715.45	9.65882	101.275
21TMS009	Spot 104	304.91	518975	2.69553	9.39957	0.439477	4.40292	0.912842	0.30392	0.800087	0.876479	1710.72	12.0217	1712.89	7.55346	1715.53	8.0808	1715.53	8.0808	99.7195
21TMS009	Spot 175	105.373	64110.4	3.54866	9.39494	0.66707	4.46026	0.838673	0.307676	0.506111	0.603467	1729.26	7.67641	1723.61	6.95626	1716.74	12.2946	1716.74	12.2946	100.73
21TMS009	Spot 10	59.2044	21955.5	1.79954	9.36032	1.99594	3.66312	2.11163	0.252515	0.67845	0.321292	1451.43	8.81739	1563.37	16.8447	1718	36.757	1718	36.757	84.484
21TMS009	Spot 289	373.832	3.97002e+07	3.58487	9.3302	0.363361	4.38137	0.940349	0.300254	0.867309	0.922327	1692.57	12.9108	1708.83	7.774	1728.81	6.67003	1728.81	6.67003	97.9039
21TMS009	Spot 99	208.281	185847	2.79812	9.15911	0.462384	4.66622	0.805327	0.313969	0.659251	0.818613	1760.21	10.1548	1761.2	6.73411	1762.37	8.45509	1762.37	8.45509	99.8773
21TMS009	Spot 35	369.869	252102	2.31287	9.16087	0.380627	4.42074	0.817138	0.296534	0.723071	0.884882	1674.1	10.6608	1716.23	6.76657	1768.02	6.95306	1768.02	6.95306	94.6878
21TMS009	Spot 221	69.0246	197771	0.590477	8.99174	0.55714	5.04596	0.939858	0.333366	0.756902	0.805337	1854.68	12.1992	1827.07	7.96488	1795.73	10.143	1795.73	10.143	103.282
21TMS009	Spot 141	28.5715	67500.2	0.96794	8.95118	0.662905	5.11566	0.999643	0.336278	0.747419	0.747686	1868.74	12.1251	1838.71	8.4907	1804.87	12.071	1804.87	12.071	103.539
21TMS009	Spot 280	33.4166	152097	0.842993	8.89965	0.503855	5.11157	0.828423	0.334546	0.657451	0.793617	1860.38	10.6244	1838.03	7.03543	1812.8	9.15459	1812.8	9.15459	102.624
21TMS009	Spot 132	43.1683	3.46792e+06	1.07981	8.92842	0.53605	5.1729	0.779397	0.338508	0.565783	0.725924	1879.49	9.22394	1848.17	6.63193	1813.08	9.73602	1813.08	9.73602	103.663
21TMS009	Spot 1	119.956	1.6351e+06	1.16105	8.9135	0.50612	5.02325	0.923863	0.328344	0.772894	0.83659	1830.35	12.3156	1823.25	7.82348	1815.13	9.19	1815.13	9.19	100.838
21TMS009	Spot 159	105.477	151971	1.67524	8.90517	0.446994	4.96459	0.731544	0.324253	0.578994	0.791468	1810.46	9.13913	1813.31	6.1827	1816.57	8.11717	1816.57	8.11717	99.6638
21TMS009	Spot 32	63.2858	311928	5.04391	8.915	0.395805	5.14269	0.828983	0.335666	0.728381	0.878644	1865.79	11.8001	1843.19	7.04716	1817.75	7.18449	1817.75	7.18449	102.643
21TMS009	Spot 274	159.484	361691	2.15914	8.87152	0.369128	4.9419	0.751237	0.32249	0.654276	0.870932	1801.88	10.285	1809.44	6.34426	1818.15	6.70015	1818.15	6.70015	99.1052
21TMS009	Spot 169	41.0457	64222.8	1.92669	8.88367	0.660776	5.01187	0.990484	0.32698	0.736918	0.743997	1823.73	11.7056	1821.33	8.38451	1818.57	12.0128	1818.57	12.0128	100.283
21TMS009	Spot 101	47.446	59114.3	1.32643	8.86378	0.577986	4.98705	0.992434	0.325173	0.806494	0.812643	1814.94	12.7574	1817.13	8.39406	1819.62	10.4961	1819.62	10.4961	99.7431
21TMS009	Spot 119	99.3975	849295	1.56884	8.88145	0.474387	5.01933	0.833601	0.326965	0.685454	0.82228	1823.66	10.8878	1822.59	7.05818	1821.35	8.60719	1821.35	8.60719	100.127
21TMS009	Spot 234	37.2503	123276	2.64431	8.83798	0.753849	4.93539	1.06509	0.320575	0.752196	0.706227	1792.54	11.7711	1808.33	8.99291	1826.56	13.6742	1826.56	13.6742	98.1371
21TMS009	Spot 158	61.7602	208082	1.8984	8.61325	0.615605	5.36413	0.905367	0.338833	0.663818	0.733204	1881.05	10.83	1879.15	7.7486	1877.03	11.0977	1877.03	11.0977	100.215
21TMS009	Spot 223	99.7804	287948	2.09245	8.50154	0.719171	5.55696	0.932738	0.34696	0.593939	0.636769	1920.06	9.86244	1909.46	8.02663	1897.93	12.9297	1897.93	12.9297	101.166
21TMS009	Spot 137	160.358	311613	2.90259	7.83893	0.415474	6.56881	0.647328	0.377756	0.496395	0.766836	2065.79	8.77374	2055.17	5.70451	2044.52	7.3438	2044.52	7.3438	101.041
21TMS009	Spot 59	73.4107	1.99648e+06	1.61523	7.77973	0.443458	6.70769	0.814545	0.381991	0.683249	0.83881	2085.58	12.1743	2073.63	7.19782	2061.77	7.82275	2061.77	7.82275	101.155
21TMS009	Spot 239	158.538	544003	2.45524	7.72871	0.479273	6.68965	0.878004	0.37987	0.735654	0.83787	2075.68	13.0554	2071.26	7.7559	2066.84	8.44752	2066.84	8.44752	100.427
21TMS009	Spot 190	72.6885	266526	2.56632	7.22267	0.546842	7.23931	0.881393	0.38362	0.691225	0.784242	2093.17	12.3544	2141.36	7.86347	2187.9	9.50968	2187.9	9.50968	95.6704
21TMS009	Spot 91	163.029	212049	2.84855	6.75451	0.3177	8.58577	0.648292	0.425444	0.565088	0.871657	2285.15	10.8724	2295.05	5.89601	2303.86	5.45552	2303.86	5.45552	99.1877
21TMS009	Spot 6	184.206	1.58439e+06	1.73856	6.3295	0.311024	9.55803	0.892947	0.44313	0.83703	0.937379	2364.64	16.5686	2393.14	8.20825	2417.49	5.27986	2417.49	5.27986	97.8138
21TMS009	Spot 96	192.86	300929	4.04441	5.35927	0.366362	12.9071	0.993864	0.507773	0.923874	0.929578	2647.12	20.057	2672.89	9.36616	2692.44	6.05101	2692.44	6.05101	98.3167
21TMS009	Spot 90	365.811	457650	12.3588	5.33356	0.383022	12.4854	0.957502	0.4884	0.877554	0.916504	2563.75	18.5631	2641.63	9.0016	2701.83	6.32405	2701.83	6.32405	94.8894
21TMS009	Spot 72	65.5438	466305	1.87545	4.85607	0.507725	16.0137	0.791314	0.569798	0.606954	0.76702	2906.99	14.2021	2877.62	7.56275	2857.11	8.26498	2857.11	8.26498	101.746
21TMS007	Spot 1	275.296	27764.1	1.39447	20.7192	3.11188	0.0233107	3.51923	0.00360846	1.54609	0.439326	23.2198	0.358353	23.3977	0.814002	41.7105	NA	23.2198	0.358353	55.6689
21TMS007	Spot 10	68.642	46136.1	0.906142	21.9577	4.83104	0.0217089	5.27857	0.00353899	2.12706	0.402961	22.7735	0.483551	21.807	1.13883	NA	NA	22.7735	0.483551
21TMS007	Spot 100	125.819	164456	0.749296	20.1598	4.43672	0.0239153	4.86223	0.00354344	1.98916	0.409105	22.8021	0.452769	23.9973	1.15312	145.438	104.105	22.8021	0.452769	15.6782
21TMS007	Spot 103	712.878	17310.5	0.476619	21.6586	2.07663	0.0220809	2.26903	0.00357376	0.743342	0.327603	22.9969	0.170641	22.1766	0.49774	NA	NA	22.9969	0.170641
21TMS007	Spot 104	131.853	6451.61	0.693803	19.3724	3.68767	0.0231926	3.83518	0.00344785	0.990309	0.258217	22.188	0.219352	23.2805	0.88269	137.59	87.0826	22.188	0.219352	16.1262
21TMS007	Spot 106	394.65	220216	1.17543	20.4291	0.944099	0.173125	1.34059	0.025974	0.951698	0.709909	165.302	1.55318	162.127	2.00882	116.005	22.2667	165.302	1.55318	142.495
21TMS007	Spot 108	271.515	18184.8	1.30116	20.8783	2.93375	0.0225279	3.14452	0.00350971	1.11514	0.354628	22.5855	0.251418	22.6206	0.703446	26.3616	NA	22.5855	0.251418	85.6757
21TMS007	Spot 109	212.785	36205.1	1.26824	12.9108	6.44413	0.0380727	6.55956	0.00362406	1.22516	0.186775	23.32	0.285192	37.9406	2.44282	1100.17	129.059	23.32	0.285192	2.11967
21TMS007	Spot 111	130.745	11418.5	1.20698	20.6232	3.81649	0.0254723	4.18799	0.003964	1.31103	0.313045	25.5031	0.333692	25.5402	1.05628	29.0387	NA	25.5031	0.333692	87.8244
21TMS007	Spot 112	415.871	11379.1	1.04096	20.9794	1.92423	0.0220033	2.21761	0.00348655	1.09415	0.49339	22.4366	0.245063	22.0996	0.484787	NA	NA	22.4366	0.245063
21TMS007	Spot 113	130.8	7008.01	0.83269	21.454	3.77653	0.0210843	4.1315	0.00348136	1.50605	0.364529	22.4033	0.336819	21.1861	0.866233	NA	NA	22.4033	0.336819
21TMS007	Spot 115	50.1256	6948.78	0.80112	23.0974	5.62638	0.020077	6.09464	0.00358269	2.24766	0.368793	23.0542	0.517255	20.1839	1.21799	NA	NA	23.0542	0.517255
21TMS007	Spot 120	284.285	8467.5	0.581747	16.142	4.54971	0.0293598	4.88751	0.00358373	1.50361	0.307643	23.0609	0.346126	29.3822	1.41548	582.42	101.033	23.0609	0.346126	3.95949
21TMS007	Spot 121	69.8319	11342.4	0.801398	17.8127	4.61553	0.0263977	4.92597	0.00353847	1.52531	0.309647	22.7702	0.346703	26.4561	1.28639	375.462	105.472	22.7702	0.346703	6.06457
21TMS007	Spot 122	65.6564	9754.7	1.14686	20.6322	4.38638	0.0231324	4.69664	0.00362507	1.66194	0.353858	23.3265	0.386972	23.2207	1.07822	12.2867	NA	23.3265	0.386972	189.852
21TMS007	Spot 123	1185.97	114719	1.28351	20.9648	1.48295	0.0232647	1.73903	0.00359846	0.90807	0.522171	23.1555	0.209891	23.352	0.401464	43.6129	35.4578	23.1555	0.209891	53.0933
21TMS007	Spot 124	42.7914	28263.2	0.727323	24.2361	4.58366	0.0204271	4.94735	0.00368984	1.85981	0.375921	23.7424	0.440753	20.5323	1.00561	NA	NA	23.7424	0.440753
21TMS007	Spot 125	1351.95	121303	2.68684	21.2437	1.26626	0.0288622	1.68954	0.00452305	1.11793	0.661679	29.0917	0.324493	28.8912	0.481249	12.2529	NA	29.0917	0.324493	237.426
21TMS007	Spot 126	78.8109	15667.5	1.04763	6.94141	22.9682	0.0834967	23.1015	0.00428913	2.47439	0.107109	27.5904	0.681234	81.4271	18.0783	2241.82	402.917	27.5904	0.681234	1.23071
21TMS007	Spot 127	76.7974	31398.3	0.838198	21.1406	4.39093	0.0222391	4.91173	0.00349385	2.20101	0.448113	22.4836	0.494004	22.3338	1.085	6.2336	NA	22.4836	0.494004	360.684
21TMS007	Spot 129	191.254	12631.5	0.739318	17.8306	4.04277	0.0263539	4.22295	0.00353613	1.19022	0.281846	22.7551	0.270359	26.4128	1.10102	373.216	91.2359	22.7551	0.270359	6.09705
21TMS007	Spot 13	167.37	41403.9	1.13884	19.691	3.65616	0.024178	3.92321	0.00353442	1.42196	0.362448	22.7442	0.322843	24.2579	0.940408	176.908	85.284	22.7442	0.322843	12.8565
21TMS007	Spot 131	536.128	1.48365e+06	0.892709	20.3989	2.69701	0.0231543	2.86957	0.00348159	0.980099	0.341549	22.4048	0.219208	23.2424	0.659383	110.778	63.6753	22.4048	0.219208	20.2249
21TMS007	Spot 133	131.449	7130.33	0.836461	18.5912	3.77284	0.0280751	4.22486	0.0039958	1.25093	0.296088	25.7072	0.320939	28.1141	1.17149	238.972	93.0757	25.7072	0.320939	10.7574
21TMS007	Spot 135	176.886	29527.6	0.670382	21.2269	3.26344	0.0223734	3.53884	0.00353431	1.36699	0.386283	22.7435	0.310354	22.4671	0.786344	NA	NA	22.7435	0.310354
21TMS007	Spot 136	255.283	37040.7	1.82696	21.4419	3.27744	0.0221619	3.82271	0.00352899	1.94664	0.509231	22.7093	0.44129	22.2571	0.841567	NA	NA	22.7093	0.44129
21TMS007	Spot 137	135.065	138554	1.84089	22.2891	3.44687	0.0249584	3.76846	0.00410573	1.52328	0.404218	26.4131	0.401521	25.0313	0.931761	NA	NA	26.4131	0.401521
21TMS007	Spot 139	342.708	23851.1	0.57867	19.4326	2.6953	0.0238	2.9164	0.00344637	1.06253	0.36433	22.1785	0.235249	23.883	0.688397	198.949	63.1148	22.1785	0.235249	11.1479
21TMS007	Spot 14	1447.44	66036.7	0.936832	21.1932	1.08264	0.0224123	1.44883	0.00351287	0.953643	0.658218	22.6057	0.2152	22.5058	0.322482	11.8632	NA	22.6057	0.2152	190.553
21TMS007	Spot 140	98.77	9298.04	0.810853	18.3207	4.52118	0.0256798	4.8226	0.0035669	1.57635	0.326866	22.9528	0.361172	25.7457	1.226	294.881	104.065	22.9528	0.361172	7.78374
21TMS007	Spot 142	92.5535	851412	0.817801	19.2271	4.52944	0.0248191	4.83118	0.00351447	1.68061	0.347867	22.616	0.379421	24.8933	1.18802	250.645	104.244	22.616	0.379421	9.02314
21TMS007	Spot 143	86.4803	31573.9	1.42852	21.4057	4.62098	0.0214625	5.00205	0.00341668	1.91238	0.382319	21.9878	0.419774	21.5621	1.06718	NA	NA	21.9878	0.419774
21TMS007	Spot 144	226.444	13237.9	1.05246	20.896	2.61982	0.0255765	2.98415	0.00403183	1.11083	0.372245	25.9386	0.287555	25.6433	0.755653	NA	NA	25.9386	0.287555
21TMS007	Spot 145	47.7531	9648.05	1.22877	21.2464	6.16891	0.0220565	6.43369	0.00356914	1.82164	0.283141	22.9672	0.417635	22.1524	1.40978	NA	NA	22.9672	0.417635
21TMS007	Spot 146	66.7205	10058.8	1.14601	17.9483	5.74671	0.0260188	6.03483	0.00353308	1.83384	0.303877	22.7356	0.4162	26.0812	1.55392	346.294	130.136	22.7356	0.4162	6.56539
21TMS007	Spot 147	181.243	6157.25	1.00673	20.252	3.06632	0.0220767	3.51816	0.00346253	1.65183	0.469515	22.2823	0.367431	22.1725	0.771608	10.2773	NA	22.2823	0.367431	216.812
21TMS007	Spot 148	516.361	159998	1.18397	21.9305	1.9274	0.0213559	2.33049	0.00345771	1.31004	0.562133	22.2514	0.291001	21.4561	0.494786	NA	NA	22.2514	0.291001
21TMS007	Spot 149	127.111	8233.66	0.905035	14.9044	4.53664	0.0331563	4.74842	0.0037406	1.26657	0.266736	24.0684	0.304276	33.1202	1.54732	751.071	96.7047	24.0684	0.304276	3.20455
21TMS007	Spot 15	203.261	36781.4	0.742354	19.5206	4.35769	0.0248408	4.53089	0.0035973	1.23537	0.272655	23.148	0.285452	24.9147	1.11512	198.815	101.301	23.148	0.285452	11.643
21TMS007	Spot 150	150.37	7107.72	0.901206	21.3663	3.55896	0.0213962	3.82366	0.00352715	1.36668	0.357428	22.6975	0.309657	21.4962	0.813301	NA	NA	22.6975	0.309657
21TMS007	Spot 152	1648.74	126487	0.928426	20.9578	1.27958	0.022837	1.53015	0.00353677	0.838589	0.548043	22.7593	0.19052	22.9275	0.346894	40.622	30.5993	22.7593	0.19052	56.027
21TMS007	Spot 155	65.2107	13544.3	1.3154	19.4833	5.01822	0.0238822	5.29501	0.00349995	1.68908	0.318994	22.5227	0.379762	23.9645	1.25407	171.052	117.221	22.5227	0.379762	13.1672
21TMS007	Spot 156	827.268	23926	1.32407	18.7323	2.98603	0.0256221	3.26326	0.00357482	1.27987	0.392206	23.0037	0.293893	25.6886	0.82777	284.663	68.6604	23.0037	0.293893	8.08103
21TMS007	Spot 157	140.86	30031.4	0.854148	19.2285	3.69786	0.0245443	3.8586	0.00350778	1.10196	0.285584	22.573	0.24831	24.621	0.9386	229.37	85.4418	22.573	0.24831	9.84133
21TMS007	Spot 158	225.299	16610.2	0.566841	18.2772	2.80536	0.0259199	3.03776	0.0035445	1.1599	0.381828	22.8089	0.264094	25.9833	0.779298	330.392	63.6959	22.8089	0.264094	6.9036
21TMS007	Spot 159	108.312	6851.04	1.2732	19.0078	4.76331	0.023831	4.98547	0.00347821	1.41628	0.284081	22.3831	0.316457	23.9138	1.17828	180.584	111.465	22.3831	0.316457	12.3949
21TMS007	Spot 16	212.035	12320.1	0.76367	20.8814	2.71946	0.0223542	3.07078	0.00352418	1.31706	0.428902	22.6784	0.298164	22.4481	0.681768	NA	NA	22.6784	0.298164
21TMS007	Spot 163	143.959	10972.2	0.689353	21.9115	3.63486	0.0209842	3.84469	0.00348911	1.21286	0.315464	22.4531	0.271851	21.0866	0.802353	NA	NA	22.4531	0.271851
21TMS007	Spot 165	340.047	9163.46	1.2355	21.9095	2.09226	0.0233141	3.10142	0.00390139	1.36064	0.438715	25.101	0.34087	23.401	0.717464	NA	NA	25.101	0.34087
21TMS007	Spot 167	124.032	13588.2	0.829667	23.8879	3.62434	0.0192293	4.82048	0.00347495	2.87916	0.597276	22.3621	0.642725	19.3398	0.923447	NA	NA	22.3621	0.642725
21TMS007	Spot 169	152.668	7809.6	0.927871	11.151	8.93517	0.0470892	9.04841	0.00394566	1.41561	0.156449	25.3853	0.358651	46.722	4.13183	1350.63	172.772	25.3853	0.358651	1.87952
21TMS007	Spot 170	194.308	10705.9	0.657282	21.6764	3.25422	0.0220972	3.67765	0.00363634	1.25699	0.341793	23.3988	0.293589	22.1928	0.80732	NA	NA	23.3988	0.293589
21TMS007	Spot 172	41.2448	14292.1	1.30929	19.7378	2.54953	0.172677	2.86427	0.0256183	1.22482	0.42762	163.066	1.97222	161.739	4.28255	142.383	60.776	163.066	1.97222	114.526
21TMS007	Spot 173	244.872	32407.3	0.591188	18.9675	3.45292	0.0251207	3.62986	0.00353594	1.08057	0.29769	22.7539	0.245439	25.192	0.903186	264.434	79.5685	22.7539	0.245439	8.60475
21TMS007	Spot 176	123.547	66448.4	1.10997	14.2848	8.93549	0.034932	9.256	0.00368518	2.41464	0.260873	23.7125	0.571521	34.8639	3.17224	891.226	184.888	23.7125	0.571521	2.66066
21TMS007	Spot 178	316.647	26631.4	0.832464	20.6307	2.29442	0.0228215	2.52682	0.0035065	1.05427	0.417233	22.5648	0.237479	22.9121	0.572466	59.5336	54.717	22.5648	0.237479	37.9026
21TMS007	Spot 180	1928.62	439472	1.90909	19.4454	0.541704	0.243077	0.915896	0.0347701	0.738468	0.806279	220.334	1.5996	220.937	1.81854	227.357	12.5082	220.334	1.5996	96.9109
21TMS007	Spot 181	413.282	795039	2.22695	20.1623	0.9388	0.173279	1.3582	0.0256928	0.981511	0.722654	163.534	1.58492	162.261	2.03676	143.724	22.0176	163.534	1.58492	113.784
21TMS007	Spot 182	56.5064	6389.11	0.770384	16.5969	4.91748	0.0286143	5.19512	0.00362859	1.67508	0.322433	23.3491	0.390408	28.6465	1.46742	499.004	108.369	23.3491	0.390408	4.67914
21TMS007	Spot 186	206.659	6601.69	1.58877	9.92401	5.13987	0.0491414	5.28012	0.00365936	1.1661	0.220848	23.5467	0.274078	48.7101	2.51124	1574.83	96.4707	23.5467	0.274078	1.49519
21TMS007	Spot 187	328.817	105864	1.96798	19.5184	0.908021	0.230297	1.21978	0.0331181	0.806597	0.661265	210.034	1.66683	210.444	2.31841	215.034	21.1703	210.034	1.66683	97.6747
21TMS007	Spot 188	626.386	12766.4	1.56216	13.665	5.45268	0.0361817	5.53973	0.00368945	0.955255	0.172437	23.7399	0.22636	36.0893	1.96414	961.049	111.56	23.7399	0.22636	2.47021
21TMS007	Spot 191	882.337	33209.2	1.09762	20.442	1.65836	0.0230589	2.01396	0.00349127	1.14141	0.566747	22.4669	0.255993	23.1478	0.460913	94.431	39.2966	22.4669	0.255993	23.7919
21TMS007	Spot 192	57.0795	263062	0.806432	19.223	5.92665	0.0254672	6.25022	0.00359687	1.98499	0.317587	23.1453	0.458607	25.5351	1.5761	256.647	136.328	23.1453	0.458607	9.01833
21TMS007	Spot 193	86.7389	10038.7	1.15698	18.0944	5.08243	0.0266562	5.34383	0.00363602	1.58576	0.296746	23.3967	0.370343	26.7118	1.40882	336.087	115.714	23.3967	0.370343	6.96151
21TMS007	Spot 197	135.119	12537.3	0.699351	19.0403	3.20901	0.0246719	3.43439	0.00352417	1.21152	0.352762	22.6783	0.27427	24.7474	0.839649	230.579	74.2304	22.6783	0.27427	9.83539
21TMS007	Spot 199	1105.99	40100.2	1.12523	21.1766	1.29204	0.0230173	1.61274	0.00360695	0.9543	0.591724	23.2101	0.221095	23.1065	0.368441	12.3215	NA	23.2101	0.221095	188.37
21TMS007	Spot 20	105.088	6161.07	0.833874	17.2395	4.13472	0.0266156	4.5086	0.00351804	1.60224	0.355375	22.639	0.362095	26.6717	1.18686	406.903	94.349	22.639	0.362095	5.56373
21TMS007	Spot 200	389.266	15681.1	0.927514	21.4569	2.56797	0.0217361	3.00624	0.00349757	1.17144	0.389669	22.5075	0.263201	21.834	0.649378	NA	NA	22.5075	0.263201
21TMS007	Spot 202	79.8683	12207.2	0.760057	18.5784	4.76191	0.0261692	5.14276	0.00365374	1.93918	0.377069	23.5106	0.455081	26.2301	1.33167	283.056	109.015	23.5106	0.455081	8.306
21TMS007	Spot 207	113.686	12750	0.742849	20.6724	3.95061	0.0225791	4.22188	0.00351107	1.47709	0.349865	22.5942	0.333151	22.6714	0.946553	30.8859	NA	22.5942	0.333151	73.1537
21TMS007	Spot 208	138.992	16083.5	0.696684	20.8507	4.11084	0.0220934	4.57901	0.00345098	2.00916	0.438777	22.2082	0.445431	22.1891	1.00502	20.1318	NA	22.2082	0.445431	110.314
21TMS007	Spot 209	131.993	15752.3	0.721785	19.0424	4.69432	0.0253279	4.94471	0.0036045	1.47521	0.29834	23.1943	0.341549	25.3973	1.24025	239.158	108.866	23.1943	0.341549	9.69833
21TMS007	Spot 21	350.066	307829	2.25478	19.6717	0.925873	0.255105	1.42792	0.0369372	1.08704	0.761278	233.82	2.49618	230.714	2.94695	199.18	21.5123	233.82	2.49618	117.391
21TMS007	Spot 210	311.035	117109	0.475757	21.2699	2.80456	0.0224988	2.98678	0.00352235	1.02724	0.34393	22.6666	0.232432	22.5917	0.667314	14.6091	NA	22.6666	0.232432	155.154
21TMS007	Spot 211	439.111	15026	1.09152	20.7854	2.18541	0.0224703	2.50719	0.00350008	1.21787	0.485751	22.5236	0.273829	22.5634	0.559467	26.781	NA	22.5236	0.273829	84.1029
21TMS007	Spot 213	264.181	259537	1.39655	21.7516	2.89786	0.022692	3.23354	0.00362872	1.4345	0.443631	23.3499	0.334348	22.7836	0.728513	NA	NA	23.3499	0.334348
21TMS007	Spot 217	73.6354	8683.71	0.76847	19.2862	4.86076	0.0256357	5.15507	0.00375457	1.70248	0.330254	24.1582	0.410519	25.702	1.30833	172.522	113.643	24.1582	0.410519	14.003
21TMS007	Spot 219	116.128	8775.63	0.96893	21.6733	3.65902	0.0222105	4.02764	0.00367396	1.66129	0.412473	23.6405	0.392018	22.3054	0.888585	NA	NA	23.6405	0.392018
21TMS007	Spot 22	1087.89	38629.4	1.07396	21.4324	1.46497	0.0220605	1.7179	0.0035056	0.893819	0.520298	22.5591	0.201285	22.1564	0.376501	NA	NA	22.5591	0.201285
21TMS007	Spot 220	818.894	21245.4	1.39631	20.8092	1.6529	0.0233521	2.00729	0.0036254	0.870298	0.433569	23.3285	0.202661	23.4387	0.465093	34.7477	NA	23.3285	0.202661	67.1369
21TMS007	Spot 223	105.819	321482	1.20705	17.9443	5.33071	0.0259861	5.61451	0.00342796	1.76245	0.31391	22.0602	0.388136	26.0489	1.44392	411.391	119.282	22.0602	0.388136	5.36236
21TMS007	Spot 224	326.338	19357.7	1.25948	20.1634	2.31556	0.0230286	2.56935	0.00346372	1.10814	0.43129	22.29	0.246577	23.1177	0.587263	110.055	54.7226	22.29	0.246577	20.2535
21TMS007	Spot 225	115.042	273387	1.08846	19.8437	1.6747	0.175712	1.88082	0.0256374	0.85601	0.455126	163.186	1.37936	164.364	2.85416	181.338	39.0312	163.186	1.37936	89.9898
21TMS007	Spot 227	402.954	16101.1	1.64918	21.2068	2.28585	0.0223879	2.64161	0.00355652	1.3083	0.495266	22.8861	0.298888	22.4816	0.587349	NA	NA	22.8861	0.298888
21TMS007	Spot 228	147.274	175416	0.668902	22.8382	3.05224	0.0224742	3.42883	0.00377776	1.56228	0.455631	24.3071	0.379031	22.5672	0.765258	NA	NA	24.3071	0.379031
21TMS007	Spot 23	1174.18	41146.8	1.21232	20.7247	1.36673	0.0231521	1.70771	0.00355481	1.02273	0.598892	22.8752	0.233537	23.2402	0.392367	61.1426	32.5791	22.8752	0.233537	37.4128
21TMS007	Spot 230	92.9199	218289	1.13389	23.687	4.08861	0.0203137	4.35237	0.00353751	1.49211	0.342827	22.764	0.339065	20.4194	0.879852	NA	NA	22.764	0.339065
21TMS007	Spot 232	86.2404	65175.9	1.35121	19.8537	1.86536	0.181603	2.16471	0.0265835	1.09826	0.507347	169.13	1.83333	169.439	3.37817	173.73	43.513	169.13	1.83333	97.3521
21TMS007	Spot 233	865.863	13255.9	0.478158	20.9129	1.56451	0.0214937	1.81531	0.00337647	0.916288	0.504756	21.7295	0.198769	21.5931	0.387843	6.45964	NA	21.7295	0.198769	336.388
21TMS007	Spot 234	218.114	13801.3	0.931258	19.7649	2.80378	0.0242669	3.08765	0.00359777	1.27638	0.413382	23.1511	0.294965	24.3459	0.742777	143.936	65.9932	23.1511	0.294965	16.0843
21TMS007	Spot 24	79.5652	23564.2	0.886776	21.9825	4.57847	0.0216153	4.90411	0.00354309	1.75116	0.35708	22.7999	0.398557	21.714	1.05357	NA	NA	22.7999	0.398557
21TMS007	Spot 240	459.935	568197	2.94203	19.4022	1.00525	0.254558	1.39302	0.036284	0.964355	0.692275	229.758	2.17666	230.272	2.87003	235.543	23.1971	229.758	2.17666	97.5439
21TMS007	Spot 241	158.313	14612.9	0.867222	20.3908	4.24389	0.0230973	4.44674	0.00353099	1.22892	0.276365	22.7221	0.278746	23.1859	1.01933	71.557	NA	22.7221	0.278746	31.7539
21TMS007	Spot 242	90.7974	15466.9	1.18445	20.3672	1.52389	0.166563	1.73999	0.0254027	0.821935	0.472379	161.711	1.31263	156.432	2.5226	77.1757	36.4112	161.711	1.31263	209.536
21TMS007	Spot 245	131.485	256340	2.72536	13.1184	0.600338	1.96494	0.842534	0.189654	0.591089	0.70156	1119.5	6.07452	1103.58	5.66964	1072.34	12.052	1072.34	12.052	104.397
21TMS007	Spot 246	52.2214	6781.9	1.21818	15.8156	6.87764	0.0297455	7.52751	0.00358002	2.90235	0.385565	23.037	0.667422	29.7626	2.20787	612.934	150.214	23.037	0.667422	3.75849
21TMS007	Spot 247	73.3599	67042.7	0.846891	22.8359	3.87057	0.0246846	4.21431	0.00416545	1.66705	0.395569	26.7964	0.445783	24.7599	1.03084	NA	NA	26.7964	0.445783
21TMS007	Spot 25	118.034	122175	0.714015	9.8346	14.784	0.0468679	14.9045	0.00339495	1.89169	0.12692	21.8482	0.4126	46.5074	6.77547	1626.38	276.459	21.8482	0.4126	1.34336
21TMS007	Spot 252	146.278	6491.02	1.01499	18.748	3.85898	0.0240842	4.63676	0.00346751	1.29338	0.278941	22.3143	0.28811	24.1648	1.10724	212.301	103.201	22.3143	0.28811	10.5107
21TMS007	Spot 253	74.5077	9059.59	1.1833	20.7557	5.02609	0.0228537	5.63517	0.00361087	2.53734	0.450269	23.2353	0.588497	22.944	1.27844	NA	NA	23.2353	0.588497
21TMS007	Spot 254	801.109	1.12001e+06	4.20088	19.5464	0.817967	0.243157	1.19418	0.0349631	0.870055	0.728579	221.536	1.89474	221.003	2.37171	215.319	18.9423	221.536	1.89474	102.887
21TMS007	Spot 255	353.487	589250	2.42886	9.03084	0.382317	4.47731	0.980661	0.297563	0.903066	0.920875	1679.21	13.3502	1726.77	8.13969	1784.9	6.96747	1784.9	6.96747	94.079
21TMS007	Spot 256	93.064	22057.1	1.31408	18.077	4.70457	0.0265586	5.01632	0.00357534	1.73238	0.345349	23.007	0.397858	26.6152	1.31776	365.802	106.173	23.007	0.397858	6.28947
21TMS007	Spot 258	152.516	7891.18	0.909239	19.845	3.80497	0.023197	4.02035	0.00351963	1.23768	0.307853	22.6492	0.279832	23.2848	0.925478	89.4315	90.6668	22.6492	0.279832	25.3257
21TMS007	Spot 26	455.777	20851.7	0.755438	21.1491	2.03147	0.0216506	2.47433	0.00342016	1.40688	0.568589	22.0102	0.309128	21.7491	0.53242	NA	NA	22.0102	0.309128
21TMS007	Spot 260	487.434	653535	1.11302	21.059	2.17917	0.026064	2.51887	0.00403966	1.26331	0.501538	25.9888	0.327659	26.1259	0.649685	38.7296	NA	25.9888	0.327659	67.1032
21TMS007	Spot 264	73.7666	236283	1.94779	21.6223	3.21448	0.0902715	3.3416	0.0143681	0.91293	0.273201	91.9638	0.833606	87.7563	2.80933	NA	NA	91.9638	0.833606
21TMS007	Spot 266	212.805	25069.7	0.738137	19.8418	4.15781	0.0233588	4.35742	0.00344972	1.30019	0.298385	22.2001	0.288146	23.4454	1.00991	153.088	97.4556	22.2001	0.288146	14.5015
21TMS007	Spot 268	110.59	9095.77	1.02131	13.2179	6.80522	0.0372817	7.01971	0.00369902	1.70348	0.242672	23.8014	0.404706	37.1666	2.56182	1016.66	138.08	23.8014	0.404706	2.34114
21TMS007	Spot 269	332.042	1.47086e+06	2.10574	9.05538	0.47865	4.73651	1.04842	0.315301	0.932782	0.889701	1766.74	14.4145	1773.72	8.78998	1781.93	8.7267	1781.93	8.7267	99.1474
21TMS007	Spot 270	166.907	30271.9	1.16134	20.5973	4.09113	0.0238067	4.30231	0.00363821	1.32979	0.309087	23.4108	0.310751	23.8896	1.01581	72.3347	NA	23.4108	0.310751	32.3646
21TMS007	Spot 272	91.321	11269.3	0.776039	18.4522	4.79282	0.0255846	5.0683	0.0035529	1.623	0.320226	22.8629	0.370408	25.6514	1.28381	295.367	109.65	22.8629	0.370408	7.7405
21TMS007	Spot 273	128.088	18335.9	1.061	20.0262	3.87634	0.0236535	4.18722	0.00353634	1.57302	0.375673	22.7565	0.357334	23.7378	0.982424	124.247	91.4235	22.7565	0.357334	18.3155
21TMS007	Spot 274	161.509	106100	0.617315	13.2997	4.52829	0.0360465	4.66265	0.00352768	1.11128	0.238336	22.7009	0.251826	35.9568	1.6472	1044.46	91.3893	22.7009	0.251826	2.17345
21TMS007	Spot 275	235.693	9001.79	0.872614	19.794	2.51047	0.0234481	2.90826	0.00352268	1.09291	0.375795	22.6687	0.247313	23.534	0.676558	112.809	63.5869	22.6687	0.247313	20.0948
21TMS007	Spot 276	860.22	76590.5	0.677729	21.0412	1.75627	0.0225162	2.05207	0.00349337	1.06125	0.51716	22.4805	0.238158	22.609	0.458824	36.2739	NA	22.4805	0.238158	61.9743
21TMS007	Spot 28	308.064	20522.3	0.838196	20.2411	2.63059	0.0228977	2.79008	0.00346028	0.898281	0.321955	22.2679	0.199683	22.9877	0.634171	98.9083	62.5264	22.2679	0.199683	22.5137
21TMS007	Spot 280	136.05	6154.66	0.806523	20.5314	4.00944	0.0217826	4.23194	0.00344808	1.06811	0.252393	22.1895	0.236602	21.8802	0.916052	NA	NA	22.1895	0.236602
21TMS007	Spot 281	114.528	8094.27	1.05508	22.2358	4.06736	0.0213611	4.37318	0.00362943	1.40561	0.321417	23.3544	0.327679	21.4613	0.928693	NA	NA	23.3544	0.327679
21TMS007	Spot 282	436.562	128996	0.662791	19.9315	0.84769	0.18374	1.23517	0.0269028	0.898135	0.727135	171.135	1.5168	171.274	1.94673	173.174	19.7965	171.135	1.5168	98.8227
21TMS007	Spot 283	80.7244	13916.4	0.761099	21.0309	4.00282	0.0234555	4.26285	0.00369807	1.4652	0.343715	23.7953	0.348007	23.5413	0.991987	NA	NA	23.7953	0.348007
21TMS007	Spot 287	1201.45	21140.2	0.95861	20.578	1.56042	0.0230842	1.83314	0.00353584	0.961644	0.524587	22.7533	0.21842	23.1728	0.419981	66.8945	37.1525	22.7533	0.21842	34.0137
21TMS007	Spot 29	133.224	640160	3.19078	14.0264	0.737891	1.52699	1.13404	0.157527	0.86114	0.759356	943.018	7.55467	941.29	6.95821	937.23	15.1148	937.23	15.1148	100.618
21TMS007	Spot 290	92.228	46043.9	0.715298	18.7683	4.57151	0.0255372	4.9761	0.00353665	1.95646	0.393171	22.7585	0.444476	25.6045	1.25817	301.579	104.353	22.7585	0.444476	7.54646
21TMS007	Spot 293	48.8456	16202.4	1.20198	17.4467	7.17116	0.0279114	7.46968	0.00362886	2.08977	0.279767	23.3508	0.487094	27.9524	2.05948	443.763	159.632	23.3508	0.487094	5.262
21TMS007	Spot 294	137.38	28108.5	0.813675	21.1761	3.79663	0.02241	4.05198	0.00352001	1.40594	0.346975	22.6516	0.317908	22.5035	0.90181	6.71484	NA	22.6516	0.317908	337.336
21TMS007	Spot 295	338.134	16526.1	2.02949	20.5936	2.89133	0.0235138	3.11059	0.00361993	1.13324	0.364317	23.2935	0.263495	23.5991	0.725606	54.8665	NA	23.2935	0.263495	42.4548
21TMS007	Spot 296	1127.94	23907.8	1.20334	20.6536	1.35544	0.0231175	1.64511	0.00354887	0.930281	0.565484	22.837	0.212072	23.2059	0.377432	61.5908	32.3316	22.837	0.212072	37.0786
21TMS007	Spot 297	587.469	183567	0.988315	21.1314	1.86705	0.022244	2.1506	0.00345508	1.06724	0.496254	22.2345	0.236887	22.3386	0.475168	33.5853	NA	22.2345	0.236887	66.2031
21TMS007	Spot 298	77.0709	13825.8	0.790561	19.7406	4.62673	0.0268681	4.8939	0.00397566	1.57972	0.322793	25.578	0.40326	26.9213	1.30019	148.507	108.62	25.578	0.40326	17.2234
21TMS007	Spot 3	1270.2	41564.6	1.12927	20.6643	1.33109	0.0234496	1.56525	0.00360691	0.816984	0.521951	23.2098	0.189279	23.5354	0.364152	56.9034	31.8489	23.2098	0.189279	40.788
21TMS007	Spot 300	91.3486	68687.4	1.12652	18.8295	4.90063	0.0255045	5.22015	0.00353983	1.79827	0.344487	22.7789	0.408904	25.5721	1.31823	296.615	111.892	22.7789	0.408904	7.67962
21TMS007	Spot 301	144.729	63527.1	0.849192	20.0952	3.76525	0.0234713	3.95997	0.00347883	1.22648	0.30972	22.387	0.274097	23.5569	0.922111	144.602	88.3825	22.387	0.274097	15.4818
21TMS007	Spot 302	59.3835	7170.77	1.22803	21.8954	5.04431	0.0212937	5.44673	0.00358533	2.02844	0.372414	23.0712	0.467149	21.3943	1.1531	NA	NA	23.0712	0.467149
21TMS007	Spot 303	350.222	38838.9	1.31955	19.4824	2.4351	0.0246898	2.69514	0.00355757	1.15267	0.427686	22.8928	0.263411	24.7652	0.659381	210.471	56.4742	22.8928	0.263411	10.8769
21TMS007	Spot 304	44.8193	23870.8	0.80125	16.4455	6.69811	0.0301894	7.11155	0.00368171	2.38939	0.335987	23.6902	0.565013	30.2002	2.11608	584.394	145.57	23.6902	0.565013	4.05381
21TMS007	Spot 306	173.457	10223.6	1.06193	19.3814	3.50862	0.0237623	3.77717	0.00347482	1.2734	0.33713	22.3613	0.284255	23.8457	0.890198	176.132	82.981	22.3613	0.284255	12.6957
21TMS007	Spot 307	87.3019	9275.22	1.55148	19.1897	4.33493	0.0246385	4.70978	0.00357663	1.83556	0.389733	23.0153	0.421706	24.7143	1.14994	193.245	100.882	23.0153	0.421706	11.9099
21TMS007	Spot 310	147.506	17942.2	0.651549	20.584	3.47456	0.0228346	3.64326	0.0035059	1.06894	0.293403	22.561	0.240743	22.9251	0.825864	61.2618	NA	22.561	0.240743	36.8272
21TMS007	Spot 313	126.535	111892	0.947486	20.6823	3.58306	0.0235434	3.70842	0.00358022	0.956072	0.257811	23.0383	0.21987	23.6285	0.866129	84.0674	85.0091	23.0383	0.21987	27.4046
21TMS007	Spot 314	103.094	8463.15	0.782905	21.8746	3.80041	0.0208756	4.12175	0.00348194	1.41845	0.344137	22.4071	0.317281	20.9786	0.855813	NA	NA	22.4071	0.317281
21TMS007	Spot 32	146.474	8044.73	0.788655	19.4788	3.49049	0.0230652	3.84646	0.00342559	1.14761	0.298354	22.045	0.252559	23.154	0.880533	139.884	86.2123	22.045	0.252559	15.7595
21TMS007	Spot 34	95.8348	34063	1.7545	20.1505	1.47415	0.190764	1.75371	0.0284989	0.921825	0.525641	181.147	1.64661	177.281	2.85273	126.062	35.1158	181.147	1.64661	143.697
21TMS007	Spot 35	395.746	237584	2.02133	19.9855	0.926175	0.185084	1.36098	0.0272214	0.997091	0.732626	173.135	1.70333	172.426	2.15826	162.694	21.6382	173.135	1.70333	106.417
21TMS007	Spot 37	1471.94	69260.6	0.859002	21.5858	1.20764	0.0221224	1.39477	0.00352612	0.697165	0.499841	22.6908	0.157914	22.2179	0.306523	NA	NA	22.6908	0.157914
21TMS007	Spot 38	788.34	51747	0.894833	21.2626	2.32283	0.022544	2.55891	0.00354474	1.07193	0.418903	22.8104	0.24408	22.6366	0.57284	4.23436	NA	22.8104	0.24408	538.698
21TMS007	Spot 4	201.337	6923.91	0.724795	23.0805	2.83083	0.0200356	3.12095	0.00359535	1.27861	0.409686	23.1355	0.295283	20.1427	0.622448	NA	NA	23.1355	0.295283
21TMS007	Spot 40	1501.33	34021	1.04496	21.0807	1.31329	0.0227822	1.8233	0.00356165	1.26448	0.693512	22.9191	0.289292	22.8731	0.412383	18.0215	NA	22.9191	0.289292	127.176
21TMS007	Spot 42	589.825	31086.1	0.857948	20.7301	2.01213	0.0253619	2.25156	0.0039017	1.00461	0.446183	25.1031	0.251696	25.4309	0.565479	56.5008	48.0358	25.1031	0.251696	44.4295
21TMS007	Spot 43	249.542	144192	1.98338	16.1717	3.52562	0.214364	3.95497	0.0255145	1.7916	0.453	162.414	2.87345	197.208	7.08895	636.944	75.8968	162.414	2.87345	25.4989
21TMS007	Spot 44	191.088	7458.42	0.677893	15.3504	5.04486	0.0307023	5.18763	0.00356658	1.14762	0.221222	22.9507	0.262919	30.7056	1.56905	688.97	107.991	22.9507	0.262919	3.33116
21TMS007	Spot 45	150.92	10237	1.11031	21.0427	3.57881	0.0224552	3.7987	0.00357816	1.24715	0.328309	23.0252	0.286646	22.5484	0.847106	NA	NA	23.0252	0.286646
21TMS007	Spot 46	239.399	23615.6	1.24914	17.1198	2.94471	0.0283566	3.26556	0.00360261	1.40401	0.429944	23.1822	0.324896	28.3921	0.914319	494.904	65.0017	23.1822	0.324896	4.68418
21TMS007	Spot 47	62.1158	11452.1	1.01721	20.9708	4.93112	0.0232349	5.34353	0.00367735	2.05497	0.384572	23.6623	0.485361	23.3225	1.23204	NA	NA	23.6623	0.485361
21TMS007	Spot 48	110.813	22354.3	0.976701	22.0757	4.08585	0.0222873	4.23988	0.00366631	1.13223	0.267044	23.5914	0.266621	22.3817	0.938574	NA	NA	23.5914	0.266621
21TMS007	Spot 5	1752.68	100990	1.24666	20.8286	0.979845	0.0229994	1.3988	0.00354672	0.998163	0.713583	22.8232	0.22741	23.0887	0.319322	50.8471	23.3724	22.8232	0.22741	44.8859
21TMS007	Spot 52	436.936	79885.2	2.46795	20.1791	0.801274	0.175772	1.30808	0.0261135	1.03386	0.790362	166.178	1.69609	164.416	1.9856	139.105	18.8154	166.178	1.69609	119.462
21TMS007	Spot 53	101.654	30642.4	0.722818	22.2179	3.47593	0.022158	3.83436	0.00365108	1.57057	0.409604	23.4935	0.368311	22.2532	0.843987	NA	NA	23.4935	0.368311
21TMS007	Spot 55	890.225	121494	1.26637	20.7795	1.82024	0.0235104	2.02551	0.00359324	0.887451	0.438138	23.122	0.204829	23.5957	0.472423	72.1224	43.311	23.122	0.204829	32.0594
21TMS007	Spot 56	101.93	18949.2	0.989757	16.9902	4.90516	0.0279197	5.12331	0.00352537	1.44751	0.282534	22.686	0.327806	27.9606	1.41297	508.433	108.127	22.686	0.327806	4.46195
21TMS007	Spot 58	811.195	16828.3	1.18783	15.1453	5.67442	0.0319097	5.84358	0.00359143	1.38111	0.236347	23.1104	0.318609	31.8944	1.83481	756.076	119.883	23.1104	0.318609	3.05662
21TMS007	Spot 6	394.334	178781	1.28287	19.8025	1.14798	0.1774	1.59519	0.0259722	1.10681	0.693843	165.29	1.80619	165.821	2.44047	173.389	26.8042	165.29	1.80619	95.3289
21TMS007	Spot 61	1333.41	42410.9	1.30475	20.607	1.41823	0.0234456	1.72863	0.00356962	0.951284	0.550309	22.9703	0.218124	23.5315	0.402096	81.2262	34.2634	22.9703	0.218124	28.2794
21TMS007	Spot 62	104.054	9196.53	0.825097	19.6281	4.94692	0.0243529	5.2747	0.00362018	1.7104	0.324265	23.295	0.397719	24.4312	1.27329	137.672	117.285	23.295	0.397719	16.9207
21TMS007	Spot 63	195.209	9112.84	1.02456	20.0408	3.36534	0.024226	3.75835	0.00367813	1.58911	0.422822	23.6673	0.37541	24.3055	0.902639	87.9072	80.7679	23.6673	0.37541	26.923
21TMS007	Spot 65	1426.44	343365	1.15567	19.6185	0.628081	0.226901	1.1755	0.0326447	0.993565	0.845231	207.079	2.02477	207.637	2.20739	214.001	14.5362	207.079	2.02477	96.7654
21TMS007	Spot 68	292.517	200771	2.05652	19.3191	0.940111	0.25345	1.24914	0.0359079	0.82248	0.658434	227.418	1.83786	229.375	2.56465	249.46	21.6225	227.418	1.83786	91.164
21TMS007	Spot 72	95.7348	11915.6	1.08273	20.4727	3.80572	0.023051	4.13028	0.00354756	1.60161	0.387772	22.8286	0.364978	23.14	0.944937	55.62	NA	22.8286	0.364978	41.0439
21TMS007	Spot 77	1040.18	57648.5	1.27251	21.0385	1.35464	0.0231563	1.8008	0.00359222	1.15523	0.641509	23.1155	0.266559	23.2444	0.413831	36.5774	33.0562	23.1155	0.266559	63.196
21TMS007	Spot 78	283.042	102903	2.30584	20.1189	1.18519	0.158707	1.59395	0.0234846	1.06093	0.665598	149.641	1.5693	149.571	2.21681	148.455	27.8723	149.641	1.5693	100.799
21TMS007	Spot 80	87.6939	7195.05	0.718987	19.4412	4.71373	0.0235233	5.12545	0.00349303	1.73673	0.338845	22.4783	0.389707	23.6086	1.19609	140.259	113.278	22.4783	0.389707	16.0262
21TMS007	Spot 83	194.536	51887.4	0.699441	19.984	3.50075	0.0238443	3.8786	0.00351192	1.66954	0.430449	22.5996	0.376648	23.927	0.917182	159.375	81.9286	22.5996	0.376648	14.1802
21TMS007	Spot 84	446.762	135667	1.05683	15.7507	4.90716	0.0338633	5.06432	0.00391531	1.25176	0.247173	25.1904	0.314708	33.8149	1.68429	699.008	104.551	25.1904	0.314708	3.60374
21TMS007	Spot 85	82.5247	19785	0.869605	14.116	5.6092	0.0350015	5.93805	0.00365827	1.94845	0.328129	23.5397	0.457821	34.9321	2.03901	910.402	115.584	23.5397	0.457821	2.58563
21TMS007	Spot 89	221.543	483893	1.76142	20.0854	1.22807	0.187893	1.49072	0.0276684	0.845037	0.566864	175.939	1.46665	174.83	2.3942	159.826	28.7194	175.939	1.46665	110.082
21TMS007	Spot 9	40.9172	240745	1.88243	8.3	1.13058	5.70363	1.438	0.349231	0.888568	0.617921	1930.92	14.8264	1931.92	12.4237	1932.97	20.2432	1932.97	20.2432	99.8944
21TMS007	Spot 90	525.071	171550	0.738793	21.791	1.90271	0.0247106	2.08741	0.00395282	0.858471	0.411262	25.4313	0.21789	24.7858	0.511117	NA	NA	25.4313	0.21789
21TMS007	Spot 92	315.603	178629	0.871249	20.7096	2.98892	0.0233811	3.32774	0.00355629	1.46292	0.439613	22.8847	0.334191	23.4674	0.77198	83.5565	70.9432	22.8847	0.334191	27.3883
21TMS007	Spot 93	117.135	35887.8	1.07607	18.4319	4.9214	0.0260887	5.06483	0.00355136	1.19673	0.236283	22.853	0.273005	26.1504	1.30756	340.717	111.493	22.853	0.273005	6.70732
21TMS007	Spot 97	1538.48	840824	2.47975	19.5884	0.430582	0.246718	0.820368	0.0354671	0.698279	0.851178	224.675	1.54183	223.907	1.64844	215.826	9.99168	224.675	1.54183	104.1
21TMS007	Spot 98	868.812	24347.5	1.54634	21.2056	2.01823	0.0223944	2.20206	0.00352939	0.880456	0.399832	22.7119	0.199616	22.488	0.489757	NA	NA	22.7119	0.199616
21TMS007	Spot 99	703.063	12078.2	1.29813	18.5119	2.59057	0.025635	2.80242	0.00356157	1.06819	0.381166	22.9186	0.244379	25.7013	0.711219	294.297	59.1437	22.9186	0.244379	7.78756
21TMS010	Spot 10	59.7835	6303.44	1.0785	21.9936	4.73611	0.0207128	5.14713	0.00351665	2.01384	0.391256	22.63	0.454934	20.8166	1.06055	NA	NA	22.63	0.454934
21TMS010	Spot 100	151.695	1504.65	0.642522	9.566	13.5878	0.0481955	14.5072	0.00369248	1.45609	0.10037	23.7594	0.345322	47.7942	6.77304	1521.39	273.564	23.7594	0.345322	1.56169
21TMS010	Spot 101	322.05	4215.62	1.5823	19.8715	2.69797	0.0209678	3.38284	0.00327037	1.11337	0.329123	21.0477	0.233957	21.0702	0.705428	23.6358	NA	21.0477	0.233957	89.0503
21TMS010	Spot 102	1040.98	11502.3	1.37874	18.781	2.35594	0.0247218	2.54928	0.0034759	0.779381	0.305726	22.3682	0.174032	24.7968	0.624485	266.994	55.7119	22.3682	0.174032	8.37782
21TMS010	Spot 103	343.407	4753.73	0.500149	20.6067	2.74024	0.0187231	3.1362	0.00301255	1.3662	0.435624	19.391	0.264522	18.8353	0.585268	NA	NA	19.391	0.264522
21TMS010	Spot 104	253.721	2192.41	1.10569	21.0339	2.51066	0.0188952	6.88796	0.00338839	1.19009	0.172778	21.8061	0.259072	19.0068	1.29701	NA	NA	21.8061	0.259072
21TMS010	Spot 105	340.608	11112.5	7.55845	20.7749	1.2592	0.0634347	2.1659	0.00990284	1.61381	0.745099	63.5238	1.02012	62.4501	1.31185	21.4839	NA	63.5238	1.02012	295.681
21TMS010	Spot 106	209.639	1400.22	1.5155	22.1115	3.3469	0.0148176	4.41419	0.0031383	1.71452	0.38841	20.1991	0.345775	14.9352	0.654443	NA	NA	20.1991	0.345775
21TMS010	Spot 107	183.323	19934	0.284458	21.2304	3.60023	0.0198285	3.76047	0.00312377	1.03198	0.274429	20.1057	0.207165	19.9365	0.742395	-0.405881	NA	20.1057	0.207165	-4953.6
21TMS010	Spot 108	351.409	39141.4	0.434931	19.9604	2.77592	0.0256299	3.13962	0.00376464	1.46679	0.467187	24.2228	0.354632	25.6963	0.796643	165.736	64.8575	24.2228	0.354632	14.6153
21TMS010	Spot 109	232.033	2946.15	1.06983	20.0959	3.17037	0.0214996	4.25176	0.00351053	1.24288	0.292322	22.5907	0.280285	21.5989	0.908637	NA	NA	22.5907	0.280285
21TMS010	Spot 11	490.345	1978.45	0.855955	19.2259	2.35566	0.0219469	2.75046	0.00360846	1.30766	0.475434	23.2198	0.30309	22.0435	0.599765	NA	NA	23.2198	0.30309
21TMS010	Spot 110	259.576	6352.84	1.04918	20.0379	2.87984	0.022465	3.28	0.00344815	1.53613	0.468331	22.19	0.34028	22.5581	0.731749	61.9878	NA	22.19	0.34028	35.7973
21TMS010	Spot 111	773.371	2308.97	0.88837	21.0109	1.44847	0.0181314	1.86571	0.00321834	1.1425	0.612367	20.7135	0.236272	18.2454	0.337367	NA	NA	20.7135	0.236272
21TMS010	Spot 112	204.891	22985.9	1.06338	19.538	2.58367	0.0243009	2.93296	0.00350987	1.3779	0.469798	22.5865	0.310675	24.3797	0.706531	204.933	60.1034	22.5865	0.310675	11.0214
21TMS010	Spot 114	535.947	12785.6	0.713947	16.8086	5.08367	0.0261914	5.24712	0.0032787	1.13619	0.216536	21.1013	0.239358	26.252	1.35982	527.401	112.366	21.1013	0.239358	4.00099
21TMS010	Spot 115	435.361	18386.8	1.53979	21.947	2.40063	0.0191623	2.6154	0.00312743	1.03364	0.395212	20.1293	0.20774	19.273	0.499313	NA	NA	20.1293	0.20774
21TMS010	Spot 116	80.7546	1920.31	1.37201	12.8351	8.98731	0.033086	9.31708	0.00343109	1.33703	0.143503	22.0803	0.294716	33.0512	3.02983	926.508	189.774	22.0803	0.294716	2.38318
21TMS010	Spot 117	261.143	5872.48	1.21115	20.3741	2.87425	0.0212391	4.16631	0.00333319	1.32543	0.31813	21.4514	0.283851	21.34	0.879813	8.82632	NA	21.4514	0.283851	243.039
21TMS010	Spot 118	803.569	10582.9	0.843276	20.9243	1.70019	0.020396	2.24436	0.00321258	1.19977	0.534573	20.6764	0.247673	20.5014	0.45551	0.0341545	NA	20.6764	0.247673	60538.1
21TMS010	Spot 12	992.825	75099	1.68448	19.6279	0.62273	0.2523	0.980778	0.0363862	0.756689	0.771519	230.394	1.71258	228.443	2.00637	208.421	14.4476	230.394	1.71258	110.542
21TMS010	Spot 120	1004.71	539627	1.78244	20.9416	0.901599	0.0805037	1.29832	0.0123221	0.934208	0.719554	78.948	0.733041	78.6184	0.982201	68.6109	21.4629	78.948	0.733041	115.066
21TMS010	Spot 121	263.861	1712.37	0.933391	21.2785	2.07795	0.0175572	3.35797	0.00335159	1.5059	0.448455	21.5696	0.324273	17.6726	0.588306	NA	NA	21.5696	0.324273
21TMS010	Spot 122	932.95	14985.6	0.899888	21.1012	1.65477	0.0238443	1.85529	0.00375184	0.833752	0.449393	24.1407	0.200897	23.9269	0.438724	2.48874	NA	24.1407	0.200897	969.996
21TMS010	Spot 123	106.163	3446.12	1.22994	17.114	5.87882	0.0258715	6.22269	0.00348649	1.99378	0.320405	22.4362	0.446553	25.9354	1.59345	363.446	133.028	22.4362	0.446553	6.17321
21TMS010	Spot 124	139.12	2537.82	1.96096	20.7312	3.86454	0.0186651	6.96559	0.00321597	1.38506	0.198843	20.6982	0.286223	18.7775	1.29594	NA	NA	20.6982	0.286223
21TMS010	Spot 125	87.9751	14966.3	0.782155	19.7841	4.38267	0.0237721	4.55785	0.00350388	1.25005	0.274263	22.548	0.281369	23.8554	1.07462	157.669	102.618	22.548	0.281369	14.3008
21TMS010	Spot 127	645.344	7288.09	0.991632	20.6931	2.10591	0.0203812	2.42969	0.00321686	1.15107	0.473751	20.7039	0.237934	20.4867	0.492775	NA	NA	20.7039	0.237934
21TMS010	Spot 128	258.152	2362.87	1.10048	19.9433	2.34725	0.0198556	4.56086	0.00330779	1.29827	0.284655	21.2882	0.275923	19.9635	0.901617	NA	NA	21.2882	0.275923
21TMS010	Spot 129	391.777	276433	4.40762	18.0046	0.75639	0.499838	1.49077	0.0658244	1.28463	0.861722	410.95	5.11444	411.593	5.04464	415.176	16.9037	410.95	5.11444	98.982
21TMS010	Spot 13	480.066	4296.8	0.40897	20.5106	1.73245	0.0190725	2.44922	0.00308118	1.43123	0.584362	19.832	0.283406	19.1835	0.465436	NA	NA	19.832	0.283406
21TMS010	Spot 132	360.8	9300.82	0.795828	20.6704	2.26494	0.0216128	2.63959	0.00337548	1.27811	0.484207	21.7231	0.277178	21.7115	0.567012	20.4228	NA	21.7231	0.277178	106.367
21TMS010	Spot 133	655.714	294503	1.16261	20.8959	1.48548	0.0245962	1.90569	0.00376067	1.19372	0.626401	24.1974	0.288308	24.6724	0.464512	71.1805	35.3531	24.1974	0.288308	33.9944
21TMS010	Spot 134	487.206	102388	1.21964	20.1648	0.91687	0.182103	1.44218	0.02694	1.11315	0.771848	171.368	1.88245	169.869	2.25586	149.025	21.4714	171.368	1.88245	114.993
21TMS010	Spot 135	423.047	3981.24	0.956907	22.0706	2.31008	0.0184237	5.20295	0.00324206	1.18844	0.228416	20.8659	0.247577	18.5368	0.955711	NA	NA	20.8659	0.247577
21TMS010	Spot 136	99.474	6747.4	1.22946	19.7471	1.93907	0.166377	2.57554	0.0251167	0.979685	0.380381	159.913	1.54737	156.27	3.73039	101.363	56.3365	159.913	1.54737	157.763
21TMS010	Spot 138	514.118	2500.05	1.24503	20.8361	2.29095	0.0186293	2.57382	0.00324311	1.12418	0.436776	20.8726	0.234267	18.7419	0.477958	NA	NA	20.8726	0.234267
21TMS010	Spot 14	267.882	2970.2	1.65692	21.7703	3.02676	0.0178141	4.69842	0.00318467	1.35426	0.288237	20.4971	0.277143	17.9289	0.834984	NA	NA	20.4971	0.277143
21TMS010	Spot 140	556.609	7005.79	0.899229	20.2553	1.98212	0.0202787	2.43822	0.00314239	1.2546	0.514555	20.2254	0.25335	20.3847	0.492068	39.2407	NA	20.2254	0.25335	51.542
21TMS010	Spot 141	389.815	78385.9	1.20631	20.1069	1.0938	0.172319	1.45618	0.0254703	0.960771	0.65979	162.136	1.53833	161.429	2.17336	151.079	25.6411	162.136	1.53833	107.318
21TMS010	Spot 142	437.326	4189	1.30457	20.5013	2.60217	0.0191271	2.84249	0.00309629	0.968261	0.340638	19.9291	0.192668	19.2379	0.541689	NA	NA	19.9291	0.192668
21TMS010	Spot 143	210.041	40981.6	1.12397	21.2458	3.69603	0.0220012	3.98517	0.00344966	1.49025	0.37395	22.1997	0.330263	22.0975	0.871109	10.9678	NA	22.1997	0.330263	202.408
21TMS010	Spot 144	126.435	9795.28	0.792745	21.1893	3.67507	0.0249394	3.97569	0.0039979	1.51392	0.380795	25.7207	0.388616	25.0124	0.982268	NA	NA	25.7207	0.388616
21TMS010	Spot 145	347.633	2455.8	1.20209	11.2194	4.03675	0.0383431	4.3074	0.00336722	1.24444	0.288907	21.67	0.269217	38.2051	1.61507	1259.47	80.617	21.67	0.269217	1.72057
21TMS010	Spot 147	164.472	6528.03	1.06302	19.206	4.63426	0.0236154	4.8383	0.00347189	1.32892	0.274667	22.3425	0.2964	23.6999	1.1334	163.614	108.796	22.3425	0.2964	13.6556
21TMS010	Spot 148	949.802	6922.37	0.27088	20.9686	2.01938	0.020372	2.43863	0.00327515	1.01236	0.415133	21.0785	0.213041	20.4775	0.494371	NA	NA	21.0785	0.213041
21TMS010	Spot 149	929.675	67079.1	1.9002	21.2197	1.45156	0.022102	2.02492	0.00344814	1.41182	0.697224	22.1899	0.312744	22.1976	0.444606	23.0071	NA	22.1899	0.312744	96.4482
21TMS010	Spot 15	435.862	17785.1	0.467976	21.5824	2.61638	0.0192475	2.97326	0.00309434	1.40989	0.474191	19.9166	0.28037	19.3579	0.570109	NA	NA	19.9166	0.28037
21TMS010	Spot 150	231.141	2200.44	1.30032	17.4765	3.95982	0.0232001	6.39593	0.00335978	1.08932	0.170315	21.6222	0.235141	23.2879	1.47253	198.785	146.508	21.6222	0.235141	10.8772
21TMS010	Spot 151	202.276	2361.28	0.566702	19.608	3.55157	0.0183513	7.95558	0.00300291	0.995599	0.125145	19.329	0.192151	18.4647	1.4557	NA	NA	19.329	0.192151
21TMS010	Spot 152	102.593	2710.25	1.06691	19.4384	4.05337	0.0260026	7.40379	0.00413806	1.69494	0.228928	26.6206	0.450272	26.0652	1.90526	NA	NA	26.6206	0.450272
21TMS010	Spot 153	178.749	2891.4	0.769624	22.4221	2.91852	0.0200094	3.17556	0.00371287	1.1484	0.361637	23.8904	0.27385	20.1166	0.63253	NA	NA	23.8904	0.27385
21TMS010	Spot 154	175.479	106933	7.77949	5.10682	0.585629	13.9507	1.56451	0.521629	1.45077	0.927295	2706.09	32.0607	2746.36	14.8243	2776.1	9.59958	2776.1	9.59958	97.478
21TMS010	Spot 155	388.157	27765	1.68574	19.8812	0.966256	0.182828	1.40642	0.0268815	1.01351	0.720627	171.001	1.71032	170.491	2.20733	163.398	22.7752	171.001	1.71032	104.653
21TMS010	Spot 156	329.181	4836.86	0.473303	10.4072	7.7762	0.0429383	7.91551	0.00337098	1.45491	0.183805	21.6942	0.315101	42.6888	3.309	1475.24	147.821	21.6942	0.315101	1.47056
21TMS010	Spot 158	107.035	283547	0.836016	9.35132	0.532589	4.53123	0.871648	0.310192	0.69001	0.791616	1741.65	10.531	1736.72	7.25058	1730.78	9.77416	1730.78	9.77416	100.628
21TMS010	Spot 159	73.6478	70497.4	1.49956	13.1454	0.812368	1.89649	1.09665	0.182956	0.736172	0.671289	1083.1	7.33966	1079.86	7.29098	1073.34	16.3078	1073.34	16.3078	100.909
21TMS010	Spot 16	355.403	2817.28	1.52983	21.1722	2.25123	0.0184674	6.06312	0.00322022	1.45937	0.240696	20.7255	0.301976	18.5804	1.11631	NA	NA	20.7255	0.301976
21TMS010	Spot 160	191.059	755475	2.25771	12.7116	0.667285	2.14001	1.06256	0.199154	0.826898	0.778214	1170.77	8.85288	1161.83	7.35318	1145.19	13.2605	1145.19	13.2605	102.234
21TMS010	Spot 161	252.025	2845.6	0.710884	18.8646	3.10519	0.0228994	6.3329	0.00350504	0.904844	0.14288	22.5554	0.203735	22.9894	1.43954	68.618	NA	22.5554	0.203735	32.871
21TMS010	Spot 162	289.034	7834.78	0.956081	21.0652	2.6538	0.0204097	2.81873	0.00327734	0.90125	0.319736	21.0926	0.189786	20.515	0.57246	NA	NA	21.0926	0.189786
21TMS010	Spot 163	264.828	12395.1	1.11808	21.0489	2.35643	0.0220749	2.73823	0.00348602	1.1758	0.429403	22.4332	0.263312	22.1707	0.600504	NA	NA	22.4332	0.263312
21TMS010	Spot 165	283.172	4176.66	1.39199	19.2653	3.14051	0.0207844	3.4371	0.00314283	1.12464	0.327208	20.2282	0.227139	20.8878	0.710599	97.4683	76.8707	20.2282	0.227139	20.7536
21TMS010	Spot 166	127.709	1253.31	0.520401	17.1486	4.95178	0.022242	7.01887	0.00349795	1.30607	0.18608	22.5099	0.293482	22.3367	1.55067	3.70975	NA	22.5099	0.293482	606.777
21TMS010	Spot 167	216.097	2196.03	0.667326	21.1021	3.48692	0.0185994	9.2872	0.00335075	1.90771	0.205413	21.5642	0.410695	18.712	1.72191	NA	NA	21.5642	0.410695
21TMS010	Spot 168	326.103	1227.64	0.59526	13.3981	7.37208	0.0291437	8.3457	0.00339343	2.00398	0.240121	21.8384	0.436897	29.169	2.39973	684.035	173.255	21.8384	0.436897	3.19259
21TMS010	Spot 169	230.077	104601	1.06234	22.2414	2.56928	0.0203135	3.00144	0.00331693	1.55152	0.516925	21.3469	0.330653	20.4193	0.606752	NA	NA	21.3469	0.330653
21TMS010	Spot 17	338.212	7172.66	0.789075	20.8251	2.62946	0.0208509	2.9591	0.003319	1.31762	0.445276	21.3602	0.28098	20.9539	0.613693	NA	NA	21.3602	0.28098
21TMS010	Spot 172	2083.49	182911	1.37975	21.2242	0.961679	0.0255079	1.32451	0.00396888	0.910752	0.687615	25.5344	0.232095	25.5755	0.334519	29.4144	23.0408	25.5344	0.232095	86.8093
21TMS010	Spot 173	263.138	4172.8	1.91946	19.9521	2.55777	0.0205756	3.25135	0.00323089	1.53394	0.471785	20.7941	0.318454	20.6801	0.665579	7.44336	NA	20.7941	0.318454	279.364
21TMS010	Spot 174	176.036	1204.98	1.24343	17.9249	4.58127	0.0202246	4.88745	0.00340101	1.64994	0.337586	21.8871	0.360512	20.3308	0.983777	NA	NA	21.8871	0.360512
21TMS010	Spot 175	372.567	3250.94	0.93813	21.6195	2.31502	0.0194768	2.91019	0.00341573	1.30277	0.447657	21.9817	0.285883	19.5862	0.564534	NA	NA	21.9817	0.285883
21TMS010	Spot 177	704.07	28787.5	0.469943	20.7651	1.93602	0.0214377	2.15145	0.00328867	0.934502	0.43436	21.1653	0.197466	21.5374	0.458487	63.3019	46.1806	21.1653	0.197466	33.4355
21TMS010	Spot 178	242.337	7284.27	1.58374	21.4543	2.61898	0.0249861	2.91038	0.00409697	1.17294	0.403019	26.3568	0.308517	25.0586	0.720375	NA	NA	26.3568	0.308517
21TMS010	Spot 179	817.563	5222.38	0.436154	21.7145	1.26819	0.0188767	1.77325	0.00319682	1.07026	0.60356	20.5752	0.219857	18.9884	0.333582	NA	NA	20.5752	0.219857
21TMS010	Spot 18	211.268	5813.05	1.23167	20.8721	3.34536	0.0207408	3.57845	0.00334463	1.21771	0.340288	21.5249	0.261672	20.8444	0.738302	NA	NA	21.5249	0.261672
21TMS010	Spot 180	275.856	3103.06	1.24063	22.9408	2.23779	0.0173008	3.00226	0.00326479	1.11999	0.37305	21.0119	0.234949	17.4167	0.518437	NA	NA	21.0119	0.234949
21TMS010	Spot 182	318.323	3183.19	0.436158	13.6736	6.71706	0.0321441	7.55263	0.00342789	2.18794	0.289692	22.0598	0.481831	32.125	2.38831	868.857	150.001	22.0598	0.481831	2.53895
21TMS010	Spot 183	349.258	1407.57	0.835006	20.2681	2.93792	0.0176429	3.24347	0.00333374	1.19165	0.367399	21.4549	0.255242	17.7581	0.570972	NA	NA	21.4549	0.255242
21TMS010	Spot 184	794.065	4837.98	0.508845	18.9453	2.03318	0.0222645	2.27441	0.00327323	1.00575	0.442202	21.0662	0.211526	22.359	0.502975	163.645	47.6896	21.0662	0.211526	12.8731
21TMS010	Spot 185	240.859	5203.15	1.51094	19.8609	2.84623	0.0212177	3.25393	0.00326418	1.44482	0.444022	21.008	0.303033	21.3187	0.686464	56.4898	NA	21.008	0.303033	37.1891
21TMS010	Spot 186	346.065	1821.34	1.76071	20.8184	2.83474	0.0165212	3.15903	0.00303078	1.33167	0.421545	19.5081	0.259392	16.6383	0.521327	NA	NA	19.5081	0.259392
21TMS010	Spot 188	301.822	2374.02	1.11506	20.129	2.65016	0.0198693	4.38051	0.00334442	1.39018	0.317354	21.5236	0.298716	19.9771	0.866547	NA	NA	21.5236	0.298716
21TMS010	Spot 189	762.541	6335.73	0.780868	21.0694	1.48146	0.0191978	1.93378	0.00311013	1.05974	0.548014	20.0181	0.21181	19.3084	0.369854	NA	NA	20.0181	0.21181
21TMS010	Spot 191	222.78	237348	1.74613	9.55266	0.545398	4.28768	0.925017	0.299565	0.747118	0.807681	1689.15	11.102	1691	7.61631	1693.27	10.0567	1693.27	10.0567	99.7566
21TMS010	Spot 193	636.315	10060.7	0.471963	20.9244	1.45634	0.0210286	1.89067	0.00331853	1.17326	0.62055	21.3572	0.25016	21.1307	0.395383	NA	NA	21.3572	0.25016
21TMS010	Spot 195	196.448	4116.3	1.37776	20.0146	2.77623	0.0221353	3.58347	0.00348672	1.27561	0.35597	22.4377	0.28572	22.2307	0.787972	-0.0849089	NA	22.4377	0.28572	-26425.7
21TMS010	Spot 196	476.053	8478.88	2.29379	20.3123	1.12114	0.0983334	1.45885	0.0151235	0.927359	0.635678	96.7625	0.890635	95.2368	1.3262	57.1678	26.8454	96.7625	0.890635	169.261
21TMS010	Spot 197	790.773	471701	2.02819	18.9793	2.05933	0.0321812	2.2104	0.00446371	0.803142	0.363347	28.7109	0.230077	32.1615	0.699756	298.014	46.9781	28.7109	0.230077	9.63407
21TMS010	Spot 198	256.494	1421.49	1.22118	19.8372	2.54269	0.0187562	3.0494	0.00343204	1.49559	0.490452	22.0864	0.329756	18.8683	0.570058	NA	NA	22.0864	0.329756
21TMS010	Spot 199	258.419	1774.44	0.906633	21.5679	3.20743	0.0160324	11.7927	0.00308746	2.02339	0.171579	19.8724	0.401476	16.1499	1.88945	NA	NA	19.8724	0.401476
21TMS010	Spot 2	244.942	1489.01	1.08712	12.1882	6.30419	0.0345852	7.46262	0.00348013	1.30962	0.175491	22.3954	0.292787	34.5236	2.53306	988.119	149.647	22.3954	0.292787	2.26647
21TMS010	Spot 20	737.54	7628.8	0.871801	20.9798	1.7468	0.0200288	2.11532	0.00320433	1.0019	0.473642	20.6234	0.206297	20.1359	0.421742	NA	NA	20.6234	0.206297
21TMS010	Spot 201	540.664	52295.9	0.729195	20.3476	2.18565	0.0210995	2.36761	0.00315307	0.9092	0.384016	20.294	0.184223	21.2011	0.496756	125.307	51.4631	20.294	0.184223	16.1954
21TMS010	Spot 202	84.4791	81997.9	3.52752	9.58188	0.527695	4.43925	0.889867	0.311101	0.716507	0.805185	1746.12	10.9598	1719.69	7.37451	1687.65	9.73736	1687.65	9.73736	103.464
21TMS010	Spot 203	1803.76	14536.4	0.375619	19.8071	1.40827	0.0278605	3.31104	0.00411215	2.97709	0.89914	26.4542	0.785953	27.9022	0.911277	154.41	33.914	26.4542	0.785953	17.1325
21TMS010	Spot 204	428.336	4249.77	0.891134	20.8757	2.07896	0.0197389	2.84627	0.00324667	1.37831	0.484251	20.8955	0.287538	19.8473	0.559424	NA	NA	20.8955	0.287538
21TMS010	Spot 205	436.624	17579	1.29484	21.3317	2.20994	0.0205018	2.55742	0.00325439	1.28425	0.502165	20.9451	0.26855	20.6067	0.521688	NA	NA	20.9451	0.26855
21TMS010	Spot 206	348.902	3821.75	0.985173	21.2161	2.58442	0.0195265	3.11095	0.00329948	1.48379	0.476959	21.2348	0.314562	19.6358	0.604989	NA	NA	21.2348	0.314562
21TMS010	Spot 207	510.841	2333.77	0.473596	20.2031	2.31505	0.0187303	2.67369	0.00317345	1.055	0.394587	20.425	0.215143	18.8425	0.499143	NA	NA	20.425	0.215143
21TMS010	Spot 208	51.6979	540122	3.90241	12.7172	0.658502	2.10445	1.05312	0.195522	0.82185	0.780395	1151.22	8.6646	1150.26	7.24885	1148.46	13.0608	1148.46	13.0608	100.24
21TMS010	Spot 209	161.425	4237.93	2.07538	20.497	3.01721	0.0196574	5.08534	0.00316903	1.33936	0.263376	20.3966	0.272751	19.7662	0.995457	NA	NA	20.3966	0.272751
21TMS010	Spot 21	401.013	19946.9	0.993706	22.0304	2.25408	0.0196422	2.65945	0.00321817	1.27534	0.47955	20.7124	0.263729	19.751	0.520193	NA	NA	20.7124	0.263729
21TMS010	Spot 210	696.207	8486.33	0.383913	20.7938	2.04559	0.0224834	2.50454	0.00354201	1.07005	0.427242	22.7929	0.243464	22.5764	0.559196	-0.402726	NA	22.7929	0.243464	-5659.66
21TMS010	Spot 211	461.996	11908	1.14959	21.1961	1.87089	0.0211152	2.35765	0.00335634	1.15764	0.491014	21.6002	0.249634	21.2168	0.495029	NA	NA	21.6002	0.249634
21TMS010	Spot 212	239.139	1565.1	0.894273	19.6595	3.5069	0.0180393	3.77246	0.00318523	0.994472	0.263613	20.5007	0.20355	18.1535	0.67875	NA	NA	20.5007	0.20355
21TMS010	Spot 213	758.824	5410.47	0.610273	16.241	3.10422	0.0289205	3.48091	0.00358683	1.50376	0.432001	23.0808	0.346459	28.9487	0.993449	547.739	68.5861	23.0808	0.346459	4.21384
21TMS010	Spot 214	732.205	66703.4	9.01649	8.82697	5.57925	0.514494	5.79066	0.0332301	1.54989	0.267654	210.733	3.21332	421.466	19.9768	1836.81	101.132	210.733	3.21332	11.4727
21TMS010	Spot 215	733.524	75093	0.665545	21.3142	1.7424	0.0227693	2.11316	0.00355966	1.19546	0.565723	22.9063	0.27335	22.8603	0.477678	18.0033	NA	22.9063	0.27335	127.234
21TMS010	Spot 216	423.03	22931.9	0.873238	22.1944	1.92199	0.0239318	2.30391	0.00393603	1.23978	0.538122	25.3235	0.31334	24.0137	0.546763	NA	NA	25.3235	0.31334
21TMS010	Spot 217	385.827	2694.76	1.10577	13.4746	5.54256	0.0302219	5.69563	0.00320474	1.19623	0.210026	20.626	0.24634	30.2322	1.69654	880.584	115.282	20.626	0.24634	2.34231
21TMS010	Spot 218	233.634	2549.6	1.08004	21.8664	2.76885	0.018901	3.24335	0.00346232	1.10112	0.339501	22.281	0.244917	19.0126	0.610908	NA	NA	22.281	0.244917
21TMS010	Spot 219	63.5532	3051.28	1.26703	20.3115	5.05759	0.019402	5.58831	0.00319409	1.97299	0.353056	20.5576	0.404952	19.5118	1.07997	NA	NA	20.5576	0.404952
21TMS010	Spot 22	395.406	1502.58	2.41798	15.2583	3.98194	0.0248661	8.39269	0.00325935	1.16271	0.138538	20.977	0.243504	24.9398	2.06762	425.632	185.685	20.977	0.243504	4.92842
21TMS010	Spot 220	634.282	8512.05	1.59453	20.7572	1.69787	0.0256279	2.18519	0.0040313	1.1166	0.510986	25.9352	0.28901	25.6943	0.554424	3.23915	NA	25.9352	0.28901	800.68
21TMS010	Spot 222	452.502	12291.5	1.28193	21.5869	2.60081	0.0194019	2.83319	0.00314119	1.07932	0.380956	20.2177	0.217872	19.5117	0.547526	NA	NA	20.2177	0.217872
21TMS010	Spot 223	135.012	75402.5	1.4598	7.79019	15.6248	0.0727342	15.6881	0.0041445	1.40706	0.08969	26.6619	0.374375	71.2908	10.801	2060.75	277.428	26.6619	0.374375	1.2938
21TMS010	Spot 224	186.542	336642	1.42927	9.11845	0.53255	4.77465	0.918415	0.318331	0.748247	0.814715	1781.57	11.6471	1780.45	7.71069	1779.12	9.71302	1779.12	9.71302	100.138
21TMS010	Spot 225	227.168	2124.12	1.3579	13.0145	9.19809	0.0330896	9.5427	0.00345104	2.47805	0.25968	22.2086	0.549392	33.0547	3.10353	914.843	189.979	22.2086	0.549392	2.42758
21TMS010	Spot 226	168.485	696655	3.2676	9.13346	0.70496	4.84775	1.06774	0.323675	0.801932	0.751057	1807.65	12.6411	1793.22	8.98788	1776.47	12.8624	1776.47	12.8624	101.755
21TMS010	Spot 227	875.211	14221.9	0.353628	21.0517	1.59749	0.0225881	1.97101	0.00355337	1.14736	0.582118	22.8659	0.26189	22.6804	0.442077	3.07166	NA	22.8659	0.26189	744.415
21TMS010	Spot 228	683.121	7460.55	1.05677	13.3867	6.89971	0.0339269	7.01191	0.00340772	1.17716	0.16788	21.9302	0.257714	33.8774	2.33626	991.762	140.734	21.9302	0.257714	2.21124
21TMS010	Spot 229	136.853	3034.24	1.37436	19.1604	4.61652	0.0225586	4.86176	0.00348393	1.4303	0.294193	22.4198	0.320113	22.6511	1.08905	47.2895	NA	22.4198	0.320113	47.4098
21TMS010	Spot 23	700.288	9779	0.522349	20.6038	2.12875	0.0204721	2.89281	0.00318477	1.22003	0.421747	20.4977	0.249682	20.5771	0.589264	29.8645	NA	20.4977	0.249682	68.6357
21TMS010	Spot 230	267.122	2216.74	1.10066	21.3842	2.75938	0.0212638	3.74147	0.00388152	1.03374	0.276293	24.9734	0.257661	21.3646	0.790997	NA	NA	24.9734	0.257661
21TMS010	Spot 232	567.998	8153.17	2.35303	21.2649	1.60927	0.0205715	2.63296	0.00332546	1.3325	0.506085	21.4018	0.284706	20.676	0.538888	NA	NA	21.4018	0.284706
21TMS010	Spot 233	428.895	27158.1	3.44703	20.7611	1.40481	0.0990551	1.9068	0.0152029	1.21904	0.63931	97.2667	1.17682	95.9038	1.74499	62.1497	34.9088	97.2667	1.17682	156.504
21TMS010	Spot 234	173.386	1740.02	1.34155	19.3019	3.43665	0.0203358	4.70456	0.00343715	1.49347	0.317451	22.1193	0.329778	20.4415	0.952065	NA	NA	22.1193	0.329778
21TMS010	Spot 235	222.029	3998.33	1.0282	20.4992	3.66308	0.0212311	4.6834	0.00344485	1.04441	0.223003	22.1688	0.231136	21.332	0.988644	NA	NA	22.1688	0.231136
21TMS010	Spot 236	534.11	10720.5	1.20785	21.3048	2.24262	0.0217266	2.53261	0.00348808	1.16373	0.459499	22.4465	0.260762	21.8246	0.546834	NA	NA	22.4465	0.260762
21TMS010	Spot 237	164.111	6077.55	1.22688	14.6707	5.92404	0.236005	6.05712	0.0262353	1.19701	0.19762	166.943	1.97267	215.144	11.744	782.162	124.85	166.943	1.97267	21.3438
21TMS010	Spot 238	328.232	9318.46	0.710318	21.3941	1.98546	0.0209866	2.22848	0.0033999	0.981156	0.44028	21.88	0.214313	21.0889	0.465115	NA	NA	21.88	0.214313
21TMS010	Spot 239	293.349	8690.25	0.840419	20.8874	3.25864	0.0207544	3.48336	0.00328792	1.19774	0.343846	21.1606	0.253033	20.858	0.719146	NA	NA	21.1606	0.253033
21TMS010	Spot 24	588.716	4292.7	0.721389	21.1888	1.68878	0.01888	2.79205	0.00315781	1.07164	0.38382	20.3245	0.217463	18.9917	0.525331	NA	NA	20.3245	0.217463
21TMS010	Spot 241	210.285	7168.94	1.19071	21.0736	3.75866	0.021527	4.01214	0.00346851	1.30364	0.324925	22.3208	0.29048	21.6262	0.858499	NA	NA	22.3208	0.29048
21TMS010	Spot 242	159.89	7625.01	1.52859	20.5543	3.3644	0.0201108	4.04873	0.00314837	0.866995	0.21414	20.2638	0.17541	20.2175	0.810457	14.7381	NA	20.2638	0.17541	137.493
21TMS010	Spot 243	134.1	7146.01	2.00544	22.6689	3.50199	0.0201232	3.74091	0.00349972	1.28868	0.344483	22.5213	0.289721	20.2298	0.749291	NA	NA	22.5213	0.289721
21TMS010	Spot 244	165.064	5781.6	0.810473	21.9424	3.25419	0.0219573	3.69128	0.00373235	1.37588	0.372737	24.0155	0.329809	22.0538	0.805291	NA	NA	24.0155	0.329809
21TMS010	Spot 245	677.4	5905.47	0.579021	20.674	1.78288	0.0228395	3.24324	0.00364267	1.04915	0.323488	23.4395	0.245468	22.93	0.73534	NA	NA	23.4395	0.245468
21TMS010	Spot 246	201.012	3561.33	0.885911	20.4602	3.35289	0.0209667	3.7772	0.00343004	1.05842	0.280213	22.0736	0.233232	21.0691	0.787622	NA	NA	22.0736	0.233232
21TMS010	Spot 247	229.576	1596.24	1.01591	20.6049	2.71109	0.022448	3.00381	0.004191	1.13295	0.377172	26.9604	0.304811	22.5413	0.669637	NA	NA	26.9604	0.304811
21TMS010	Spot 248	521.724	16355	0.646703	17.83	3.80526	0.0237516	3.93232	0.00314818	0.990769	0.251956	20.2626	0.200441	23.8351	0.926355	400.708	85.3018	20.2626	0.200441	5.0567
21TMS010	Spot 25	495.948	2528.64	0.655556	21.4178	2.27186	0.0198587	3.15299	0.0035574	1.17696	0.373284	22.8918	0.26895	19.9666	0.623396	NA	NA	22.8918	0.26895
21TMS010	Spot 250	364.036	6475.36	0.989279	20.3972	2.53823	0.0222031	3.59921	0.0034746	1.22448	0.340207	22.3599	0.273318	22.298	0.793804	15.6514	NA	22.3599	0.273318	142.862
21TMS010	Spot 251	233.04	1805.52	1.26584	20.1309	3.62394	0.017754	10.8194	0.00313474	1.95906	0.181068	20.1762	0.394646	17.869	1.91641	NA	NA	20.1762	0.394646
21TMS010	Spot 253	106.287	1385.69	1.29773	19.8132	4.50178	0.0180568	11.1264	0.00332749	1.48663	0.133612	21.4148	0.317829	18.171	2.0038	NA	NA	21.4148	0.317829
21TMS010	Spot 254	423.981	1974.13	0.465809	19.0553	2.88454	0.0194027	3.24572	0.00315675	1.38405	0.426423	20.3177	0.280764	19.5125	0.627274	NA	NA	20.3177	0.280764
21TMS010	Spot 255	241.269	6585.81	1.53847	20.6047	2.61771	0.0333888	2.98207	0.0052781	1.32641	0.444794	33.9353	0.448937	33.3487	0.978327	NA	NA	33.9353	0.448937
21TMS010	Spot 256	325.342	2128.19	1.43612	21.3449	2.73857	0.0171592	4.09267	0.00315145	1.42801	0.348919	20.2836	0.289197	17.2754	0.701044	NA	NA	20.2836	0.289197
21TMS010	Spot 257	349.184	25559.4	0.982423	20.8747	2.47203	0.020277	2.71476	0.0031349	1.11498	0.410711	20.1773	0.224621	20.3829	0.547831	44.7195	NA	20.1773	0.224621	45.1196
21TMS010	Spot 258	463.056	5713.51	0.681365	18.4573	3.89221	0.0226152	4.55146	0.00320477	1.27844	0.280885	20.6262	0.263272	22.7073	1.02204	248.956	100.591	20.6262	0.263272	8.2851
21TMS010	Spot 259	301.51	3751.35	0.456804	20.3058	2.41626	0.0191445	2.71042	0.00309081	1.17802	0.434627	19.8939	0.233994	19.2553	0.516982	NA	NA	19.8939	0.233994
21TMS010	Spot 26	973.086	4125.26	0.496364	13.4608	7.47764	0.0331624	7.60494	0.00342249	1.28891	0.169483	22.0251	0.283399	33.1263	2.47859	936.388	153.927	22.0251	0.283399	2.35214
21TMS010	Spot 260	263.641	4071.97	1.14606	20.213	3.37123	0.0216864	3.63343	0.00345942	1.18923	0.327301	22.2623	0.264293	21.7846	0.7831	NA	NA	22.2623	0.264293
21TMS010	Spot 261	135.974	12336.9	0.978901	20.8108	3.20896	0.0265002	3.38614	0.0041356	1.07983	0.318896	26.6048	0.286693	26.5575	0.887615	22.302	NA	26.6048	0.286693	119.293
21TMS010	Spot 262	199.797	4577.12	1.12362	20.4246	2.71387	0.0217869	2.9378	0.00348393	1.03349	0.351789	22.4198	0.231303	21.8845	0.636043	NA	NA	22.4198	0.231303
21TMS010	Spot 264	109.512	4437.22	0.878669	16.4972	4.09796	0.0267011	4.41858	0.00340421	1.58774	0.359333	21.9077	0.347246	26.7562	1.1668	487.131	91.0593	21.9077	0.347246	4.49728
21TMS010	Spot 265	223.658	7660.05	0.598568	21.1496	3.03323	0.0200839	3.30329	0.0032359	1.3014	0.39397	20.8263	0.270596	20.1907	0.660371	NA	NA	20.8263	0.270596
21TMS010	Spot 266	267.334	1830.73	0.959544	21.1205	2.87484	0.0171826	4.00958	0.00320335	1.5466	0.385727	20.6171	0.318355	17.2988	0.687733	NA	NA	20.6171	0.318355
21TMS010	Spot 267	331.577	12280.8	0.959797	20.6296	2.40737	0.021657	2.73083	0.00334746	1.28158	0.4693	21.5431	0.275632	21.7554	0.587784	45.3037	NA	21.5431	0.275632	47.5526
21TMS010	Spot 269	447.247	8823.8	0.576218	21.3842	3.09162	0.0193363	3.41448	0.00313163	1.32722	0.388704	20.1562	0.2671	19.4463	0.657673	NA	NA	20.1562	0.2671
21TMS010	Spot 27	293.866	14244	3.56291	20.7071	1.32277	0.100217	1.84912	0.0154988	1.26561	0.684437	99.1454	1.24519	96.9762	1.71024	43.95	32.2073	99.1454	1.24519	225.587
21TMS010	Spot 270	257.636	4677.3	1.09028	21.0655	2.83954	0.0206609	3.12119	0.0034077	1.215	0.389276	21.9301	0.265999	20.7649	0.64153	NA	NA	21.9301	0.265999
21TMS010	Spot 271	328.412	32185.8	1.10554	20.8907	2.56979	0.0215546	2.89489	0.00332191	1.32872	0.45899	21.3789	0.283596	21.6537	0.620213	52.2782	NA	21.3789	0.283596	40.8945
21TMS010	Spot 272	316.807	35508.6	1.43919	20.0806	0.794325	0.184347	1.16776	0.027274	0.852038	0.729634	173.464	1.45827	171.794	1.84561	148.861	18.7091	173.464	1.45827	116.528
21TMS010	Spot 273	173.713	1980.54	0.5735	17.3887	4.29835	0.0236755	4.45194	0.00345465	0.993894	0.223249	22.2317	0.220579	23.7595	1.04548	181.165	101.164	22.2317	0.220579	12.2715
21TMS010	Spot 274	288.193	2860.23	1.10681	20.7949	3.19042	0.0184652	4.17323	0.00314541	1.12996	0.270763	20.2448	0.228399	18.5782	0.768264	NA	NA	20.2448	0.228399
21TMS010	Spot 275	123.862	138408	2.47359	5.45006	0.541821	13.0396	1.13983	0.519438	1.0028	0.879782	2696.8	22.0997	2682.53	10.7497	2671.77	8.9715	2671.77	8.9715	100.937
21TMS010	Spot 276	192.162	34533.8	2.19708	13.2661	0.770753	0.597645	1.58563	0.0582407	1.38523	0.873614	364.918	4.91454	475.738	6.02283	1053.02	15.5638	364.918	4.91454	34.6545
21TMS010	Spot 277	184.104	10735.7	1.39234	21.2296	2.97931	0.020946	3.16658	0.00334666	1.06896	0.337576	21.5379	0.229848	21.0485	0.659659	NA	NA	21.5379	0.229848
21TMS010	Spot 278	610.989	7613.53	0.473347	19.9988	1.99018	0.0219244	2.32083	0.00333004	1.14008	0.491237	21.4311	0.243926	22.0211	0.505572	86.9444	47.9344	21.4311	0.243926	24.6493
21TMS010	Spot 279	320.693	23747.5	0.974518	19.4591	2.85719	0.0219163	3.05023	0.00315135	1.06586	0.349437	20.2829	0.215849	22.0131	0.664225	215.296	66.2087	20.2829	0.215849	9.42095
21TMS010	Spot 28	114.541	16416.5	0.704958	20.9534	4.377	0.0231038	4.6386	0.00360603	1.53188	0.330246	23.2041	0.354821	23.1923	1.0636	21.9866	NA	23.2041	0.354821	105.538
21TMS010	Spot 280	301.778	4159.45	0.469862	22.0071	1.9693	0.0217816	2.5745	0.00379726	1.5938	0.619073	24.4324	0.388667	21.8793	0.557257	NA	NA	24.4324	0.388667
21TMS010	Spot 281	177.784	2398.35	0.829408	20.088	3.77895	0.0210201	5.77649	0.00351926	1.55655	0.269463	22.6468	0.35189	21.1222	1.20752	NA	NA	22.6468	0.35189
21TMS010	Spot 282	407.654	2943.85	0.768413	10.8573	3.23075	0.0400325	3.58687	0.00334511	1.40881	0.392768	21.5279	0.302782	39.8558	1.40188	1355.96	63.62	21.5279	0.302782	1.58765
21TMS010	Spot 283	320.523	10012.9	1.09229	21.825	2.50396	0.0192883	3.29008	0.00317648	1.32594	0.403013	20.4445	0.270653	19.3985	0.632168	NA	NA	20.4445	0.270653
21TMS010	Spot 284	131.853	1357.23	1.13687	20.3714	4.00294	0.017053	5.02435	0.00327056	1.7273	0.343786	21.049	0.362986	17.1694	0.855398	NA	NA	21.049	0.362986
21TMS010	Spot 285	607.972	32615.7	0.351414	21.2771	2.07134	0.0210307	2.34611	0.00329832	1.09942	0.468613	21.2273	0.232993	21.1328	0.490674	10.3683	NA	21.2273	0.232993	204.732
21TMS010	Spot 286	248.433	1317.31	1.02825	12.9211	6.08516	0.0320393	7.07493	0.00351926	1.46641	0.207269	22.6468	0.331513	32.0219	2.23018	807.255	144.993	22.6468	0.331513	2.80541
21TMS010	Spot 288	525.737	10326	0.846551	21.741	1.64014	0.019946	2.0217	0.00326702	1.03551	0.512198	21.0263	0.217375	20.0535	0.401446	NA	NA	21.0263	0.217375
21TMS010	Spot 289	353.124	3058.31	0.810673	19.3141	2.27965	0.0213164	5.80113	0.00331436	1.33214	0.229635	21.3304	0.283682	21.4168	1.22941	31.1054	NA	21.3304	0.283682	68.5746
21TMS010	Spot 29	185.058	62790.2	3.03073	13.0484	0.537972	1.92847	0.977065	0.18443	0.814807	0.833933	1091.13	8.1789	1091.01	6.53329	1090.75	10.8077	1090.75	10.8077	100.035
21TMS010	Spot 290	282.272	203269	1.0094	20.1494	1.94013	0.0231184	2.22289	0.00340349	1.08495	0.488081	21.903	0.237234	23.2068	0.510012	160.432	45.3808	21.903	0.237234	13.6526
21TMS010	Spot 291	172.416	7215.71	1.53119	21.434	3.51842	0.0193654	3.79819	0.00316784	1.39616	0.367586	20.389	0.284213	19.4753	0.732662	NA	NA	20.389	0.284213
21TMS010	Spot 293	189.412	3245.77	1.27671	20.735	2.86603	0.0184859	3.79344	0.00308953	1.49867	0.395068	19.8857	0.297561	18.5989	0.699114	NA	NA	19.8857	0.297561
21TMS010	Spot 294	280.211	9104.37	1.26669	20.1037	2.7317	0.0231344	3.48053	0.00350748	1.34433	0.386242	22.5711	0.302898	23.2227	0.799099	91.1848	76.0684	22.5711	0.302898	24.7531
21TMS010	Spot 295	387.696	2755.67	0.880571	21.0943	2.3842	0.0189793	3.08116	0.00329505	1.12449	0.364956	21.2063	0.238071	19.0907	0.58272	NA	NA	21.2063	0.238071
21TMS010	Spot 296	82.1628	2359.43	1.08233	18.2096	5.37041	0.0226987	5.95497	0.00340177	1.73911	0.292044	21.892	0.380081	22.7902	1.34203	118.581	NA	21.892	0.380081	18.4617
21TMS010	Spot 297	537.532	4149.87	0.463711	20.4669	2.15542	0.0201512	4.11621	0.00324497	1.10068	0.267401	20.8846	0.2295	20.2578	0.825589	NA	NA	20.8846	0.2295
21TMS010	Spot 298	117.611	2240.26	1.35682	19.6035	4.3989	0.0192238	8.78179	0.00315834	1.29496	0.14746	20.3279	0.262823	19.3343	1.68184	NA	NA	20.3279	0.262823
21TMS010	Spot 299	232.658	4241.38	0.766207	19.0302	2.89871	0.0218545	3.26686	0.00324801	1.41881	0.434305	20.9041	0.296109	21.9517	0.709436	138.232	69.1066	20.9041	0.296109	15.1224
21TMS010	Spot 3	965.009	4980.15	0.681474	21.1414	1.24989	0.0209139	1.65354	0.00343942	1.06038	0.641277	22.1339	0.2343	21.0166	0.343945	NA	NA	22.1339	0.2343
21TMS010	Spot 30	542.474	9216.65	0.950157	19.5204	1.81352	0.0218261	2.77902	0.00321379	1.48254	0.533476	20.6842	0.30616	21.9235	0.602728	160.048	55.0103	20.6842	0.30616	12.9237
21TMS010	Spot 300	733.53	31519.4	0.479208	21.0709	2.60808	0.0216182	3.14494	0.00335342	1.75702	0.55868	21.5814	0.378554	21.7168	0.675729	36.7169	NA	21.5814	0.378554	58.7778
21TMS010	Spot 301	231.737	1887.34	1.17246	21.2322	3.13949	0.0185609	3.46353	0.00345242	1.18938	0.343402	22.2174	0.263795	18.6736	0.640856	NA	NA	22.2174	0.263795
21TMS010	Spot 302	329.885	2101.35	1.43809	19.0315	2.96041	0.0193473	3.9186	0.00309976	1.06798	0.272542	19.9514	0.212748	19.4573	0.755195	NA	NA	19.9514	0.212748
21TMS010	Spot 303	352.839	7950.78	0.935379	21.7398	1.99471	0.0203052	2.33125	0.00335367	1.18837	0.509755	21.583	0.256056	20.411	0.47108	NA	NA	21.583	0.256056
21TMS010	Spot 304	416.017	5442.4	1.13062	20.8054	2.35338	0.0191968	3.04684	0.00308603	1.35722	0.44545	19.8632	0.269171	19.3074	0.582708	NA	NA	19.8632	0.269171
21TMS010	Spot 305	281.267	11542.5	0.730607	21.7161	2.48811	0.0244544	2.75069	0.00398262	1.16868	0.424867	25.6226	0.298852	24.5318	0.66671	NA	NA	25.6226	0.298852
21TMS010	Spot 306	200.254	10492.9	2.27194	21.1034	2.35482	0.019787	2.59842	0.00313765	1.09319	0.420714	20.1949	0.220424	19.8952	0.511931	NA	NA	20.1949	0.220424
21TMS010	Spot 307	272.343	5975.38	1.0962	20.9956	2.4814	0.0211971	2.87586	0.00342273	1.3579	0.472173	22.0266	0.29859	21.2983	0.60613	NA	NA	22.0266	0.29859
21TMS010	Spot 308	458.176	13727.9	0.506846	22.2982	2.10178	0.0182476	2.47187	0.00303962	0.980287	0.396578	19.5649	0.191502	18.3613	0.449788	NA	NA	19.5649	0.191502
21TMS010	Spot 310	123.309	2531.3	1.50399	21.5774	4.10242	0.0201947	4.83705	0.00363654	1.20046	0.248181	23.4001	0.2804	20.3011	0.972222	NA	NA	23.4001	0.2804
21TMS010	Spot 311	287.809	2824.46	1.14128	21.5351	2.57363	0.0185375	4.88954	0.0032808	0.952987	0.194903	21.1148	0.200892	18.6504	0.903593	NA	NA	21.1148	0.200892
21TMS010	Spot 312	845.374	10481.5	1.09032	20.7055	1.13493	0.0241854	1.55683	0.0037579	0.968512	0.622105	24.1796	0.233743	24.2652	0.37329	32.7769	29.1922	24.1796	0.233743	73.7702
21TMS010	Spot 313	295.063	2259.27	0.858935	20.0706	3.10643	0.0197278	4.72256	0.00332302	1.35091	0.286055	21.3861	0.288428	19.8362	0.927688	NA	NA	21.3861	0.288428
21TMS010	Spot 314	385.656	2674.23	1.02683	20.4399	2.93505	0.0184366	3.54963	0.00309688	1.3237	0.372911	19.9329	0.263443	18.5497	0.652469	NA	NA	19.9329	0.263443
21TMS010	Spot 315	144.253	5135.59	1.25782	19.3611	3.97194	0.0228676	4.12805	0.00341061	1.11789	0.270803	21.9488	0.244946	22.9579	0.937079	129.914	93.5244	21.9488	0.244946	16.8949
21TMS010	Spot 32	299.231	5683.99	0.922413	19.5793	2.82712	0.0272201	3.28761	0.0041032	1.67262	0.508764	26.3968	0.440614	27.2693	0.884578	104.823	66.9026	26.3968	0.440614	25.1823
21TMS010	Spot 33	332.96	6009.84	0.470211	10.1967	10.1708	0.0368295	10.3017	0.00281096	1.62762	0.157996	18.0952	0.294109	36.7239	3.7156	1528.56	192.097	18.0952	0.294109	1.18381
21TMS010	Spot 34	308.454	3310.65	1.4687	19.7686	2.47609	0.0202912	2.81151	0.00321609	1.2157	0.4324	20.699	0.251234	20.3971	0.567745	NA	NA	20.699	0.251234
21TMS010	Spot 35	583.876	52924.7	1.10766	21.419	1.89696	0.020496	2.35745	0.00322872	1.39957	0.593681	20.7802	0.290365	20.6009	0.480762	-0.251545	NA	20.7802	0.290365	-8261.02
21TMS010	Spot 36	484.723	2974.89	0.498674	16.3947	5.38761	0.025822	5.56319	0.003366	1.32867	0.238833	21.6622	0.287337	25.8864	1.42191	437.943	120.304	21.6622	0.287337	4.94635
21TMS010	Spot 37	79.5086	1299.89	0.642592	17.5709	5.91782	0.020458	7.06149	0.00328579	1.79152	0.253703	21.1468	0.378229	20.5631	1.43746	NA	NA	21.1468	0.378229
21TMS010	Spot 38	306.201	145809	1.15399	19.969	2.92595	0.021218	3.25334	0.00310378	1.42233	0.437191	19.9773	0.283704	21.319	0.68635	175.355	68.2538	19.9773	0.283704	11.3925
21TMS010	Spot 39	215.612	1651.92	1.25739	19.2809	3.24886	0.0203847	7.69083	0.00347413	1.13705	0.147844	22.3569	0.253768	20.4901	1.56007	NA	NA	22.3569	0.253768
21TMS010	Spot 40	767.049	7053.26	1.58087	19.762	1.75701	0.0210408	2.174	0.00316776	1.04916	0.482594	20.3884	0.21357	21.1428	0.454893	107.789	44.9855	20.3884	0.21357	18.9151
21TMS010	Spot 41	222.069	5860.53	0.518079	13.6644	4.24469	0.0324966	4.36894	0.00335521	1.00738	0.230578	21.5928	0.217159	32.4717	1.39622	935.514	87.2141	21.5928	0.217159	2.30813
21TMS010	Spot 42	62.5678	3087.66	0.871346	19.2282	4.82556	0.0241396	5.17789	0.00373357	1.53955	0.297331	24.0233	0.369162	24.2197	1.23923	43.7688	NA	24.0233	0.369162	54.8868
21TMS010	Spot 43	194.957	1924.48	1.59435	20.0981	3.13023	0.0187739	9.85686	0.00326263	1.38914	0.140932	20.998	0.291218	18.8859	1.84436	NA	NA	20.998	0.291218
21TMS010	Spot 44	286.07	11161.3	1.38403	20.1783	1.12641	0.175404	1.46088	0.0265507	0.927695	0.635025	168.924	1.54675	164.098	2.21358	95.0293	26.73	168.924	1.54675	177.76
21TMS010	Spot 45	286.314	1251.43	1.04637	21.4263	2.93062	0.0146905	4.79298	0.00309368	0.973844	0.203181	19.9124	0.193616	14.808	0.704593	NA	NA	19.9124	0.193616
21TMS010	Spot 48	340.946	76688.9	0.995213	19.8722	0.864657	0.191072	1.43798	0.0278088	1.14892	0.798981	176.82	2.0039	177.544	2.3423	187.175	20.1449	176.82	2.0039	94.4678
21TMS010	Spot 49	245.505	2620.62	1.32475	19.9241	2.94232	0.0211499	3.2798	0.0034673	1.18765	0.362111	22.313	0.264542	21.2513	0.689758	NA	NA	22.313	0.264542
21TMS010	Spot 5	212.047	3415.6	0.995452	21.4563	3.12376	0.0201868	3.70041	0.0034848	1.21114	0.327299	22.4254	0.271131	20.2932	0.743477	NA	NA	22.4254	0.271131
21TMS010	Spot 51	328.677	28066.6	1.1033	20.2991	1.05105	0.175192	1.54274	0.0262582	1.124	0.728574	167.087	1.85394	163.915	2.33523	118.339	24.889	167.087	1.85394	141.193
21TMS010	Spot 52	120.837	2091.13	0.489179	11.6591	7.3302	0.0386955	7.52281	0.00357876	1.3769	0.183031	23.029	0.316522	38.5496	2.84566	1157.51	146.896	23.029	0.316522	1.98952
21TMS010	Spot 53	155.595	9174.8	2.1254	20.2124	1.06937	0.181125	1.50745	0.0276329	0.967542	0.64184	175.716	1.67717	169.028	2.34723	76.3673	27.4869	175.716	1.67717	230.094
21TMS010	Spot 54	595.643	13504.4	0.971604	20.1721	1.45755	0.0261185	1.71898	0.00393434	0.884008	0.514264	25.3127	0.223327	26.1799	0.444274	106.552	34.8398	25.3127	0.223327	23.7561
21TMS010	Spot 55	398.685	8327.8	1.04066	20.9674	2.44428	0.0207228	3.31064	0.00329598	1.10887	0.334943	21.2123	0.234831	20.8265	0.682468	NA	NA	21.2123	0.234831
21TMS010	Spot 56	147.806	9007.81	1.30497	20.1397	4.02621	0.0211508	4.32109	0.00321867	1.33397	0.308711	20.7156	0.275895	21.2522	0.908784	82.377	NA	20.7156	0.275895	25.1473
21TMS010	Spot 57	113.81	2804.62	0.767594	20.2645	3.55132	0.0240838	3.92905	0.00399421	1.47433	0.375239	25.697	0.378106	24.1645	0.938225	NA	NA	25.697	0.378106
21TMS010	Spot 59	949.46	77998.6	0.264757	21.642	1.67563	0.0207506	1.93097	0.00329483	0.959473	0.496887	21.2049	0.203121	20.8542	0.39858	NA	NA	21.2049	0.203121
21TMS010	Spot 60	354.041	145894	9.85188	20.2893	1.24743	0.0840317	1.85968	0.0124829	1.37919	0.74163	79.9721	1.09616	81.9283	1.46376	139.354	29.2773	79.9721	1.09616	57.3877
21TMS010	Spot 62	208.016	6511.59	0.716175	13.3155	7.30613	0.278475	7.6602	0.0278855	2.27584	0.297099	177.301	3.98009	249.447	16.9435	997.973	148.769	177.301	3.98009	17.7661
21TMS010	Spot 63	245.697	17928.2	1.14417	20.1268	2.68834	0.0214424	2.91971	0.00320177	1.10987	0.380129	20.6069	0.228344	21.5421	0.622343	127.229	63.5795	20.6069	0.228344	16.1967
21TMS010	Spot 64	729.91	4851.29	0.562221	21.2664	1.43352	0.01884	3.90996	0.00312667	1.03905	0.265744	20.1244	0.208776	18.9518	0.734137	NA	NA	20.1244	0.208776
21TMS010	Spot 65	123.92	6640.64	1.46135	20.7567	4.21338	0.0217169	4.71186	0.00345063	1.55972	0.331019	22.2059	0.345753	21.815	1.01693	NA	NA	22.2059	0.345753
21TMS010	Spot 66	197.926	9486.02	1.39641	11.8769	3.33597	0.0407038	3.54925	0.00359292	1.10864	0.312358	23.12	0.255857	40.511	1.40953	1249.43	65.9968	23.12	0.255857	1.85044
21TMS010	Spot 67	1289.38	5809.68	1.84398	21.0142	0.981613	0.021202	1.72329	0.00343703	1.11125	0.64484	22.1185	0.245371	21.3031	0.363291	NA	NA	22.1185	0.245371
21TMS010	Spot 68	250.157	1914.17	1.21994	19.1238	3.28924	0.0196223	6.31607	0.00321556	1.41868	0.224615	20.6956	0.293133	19.7312	1.23421	NA	NA	20.6956	0.293133
21TMS010	Spot 7	533.954	5544.41	1.45027	20.9633	1.90883	0.019826	2.51969	0.00321144	1.36714	0.542585	20.6691	0.282124	19.9341	0.497378	NA	NA	20.6691	0.282124
21TMS010	Spot 70	290.13	4666.52	0.918888	21.6645	2.78289	0.021848	3.56405	0.00371099	2.20345	0.618243	23.8783	0.525173	21.9452	0.773749	NA	NA	23.8783	0.525173
21TMS010	Spot 71	280.508	4584.2	0.820182	21.0704	2.58486	0.0214087	2.99924	0.00353336	1.28348	0.427934	22.7373	0.291314	21.5086	0.63831	NA	NA	22.7373	0.291314
21TMS010	Spot 72	222.671	3346.03	0.538884	14.9202	4.72833	0.0282244	4.95546	0.00328618	1.40582	0.283691	21.1494	0.296834	28.2616	1.38118	684.165	101.487	21.1494	0.296834	3.09127
21TMS010	Spot 73	545.736	10375.9	1.08953	20.8669	2.22812	0.0204743	2.55591	0.00321416	1.20712	0.472285	20.6866	0.249311	20.5793	0.520694	8.03429	NA	20.6866	0.249311	257.479
21TMS010	Spot 74	558.322	239426	0.744214	20.363	1.58561	0.0230983	1.93541	0.00343757	1.10981	0.573421	22.122	0.245091	23.1868	0.443676	135.031	37.2432	22.122	0.245091	16.3829
21TMS010	Spot 75	122.663	2257.84	0.914177	20.7811	3.45652	0.017816	4.04119	0.00313159	1.45238	0.359393	20.156	0.292283	17.9308	0.718259	NA	NA	20.156	0.292283
21TMS010	Spot 76	88.0989	9066.47	0.596987	20.607	4.29518	0.022835	4.61474	0.00355371	1.60333	0.347436	22.8681	0.366001	22.9255	1.0461	28.969	NA	22.8681	0.366001	78.9398
21TMS010	Spot 77	647.492	5456.49	1.02177	21.9471	1.68386	0.0184115	2.85278	0.00313582	0.952412	0.333854	20.1832	0.191926	18.5247	0.523677	NA	NA	20.1832	0.191926
21TMS010	Spot 78	117.308	1371.07	0.930444	10.6925	10.5239	0.0379632	12.3873	0.00332789	1.99272	0.160868	21.4173	0.426079	37.8335	4.60036	1262.97	239.726	21.4173	0.426079	1.69579
21TMS010	Spot 79	136.568	8608.88	1.56399	20.2046	3.53177	0.0230412	4.2188	0.00351877	1.44719	0.343033	22.6436	0.327121	23.1302	0.964786	73.9945	NA	22.6436	0.327121	30.6018
21TMS010	Spot 8	650.678	23460.4	1.29057	20.9612	1.5989	0.0235652	1.85454	0.00365105	0.939329	0.506501	23.4933	0.220278	23.6501	0.433533	39.6417	38.2356	23.4933	0.220278	59.2641
21TMS010	Spot 80	420.523	252697	1.3579	21.0668	2.18854	0.0205048	2.43779	0.00315576	1.07383	0.440491	20.3113	0.217765	20.6096	0.497355	55.5372	52.209	20.3113	0.217765	36.5724
21TMS010	Spot 81	383.039	10516	0.454173	20.8715	2.60935	0.0197733	2.8053	0.00310274	0.995945	0.355023	19.9706	0.198588	19.8816	0.552312	9.12857	NA	19.9706	0.198588	218.77
21TMS010	Spot 82	790.443	350018	0.872856	21.5517	1.68434	0.0209008	1.98503	0.00329011	1.0504	0.529161	21.1746	0.222053	21.0036	0.412645	1.44838	NA	21.1746	0.222053	1461.95
21TMS010	Spot 83	107.732	3024.75	0.887239	8.54298	12.9698	0.0525207	13.0726	0.00340662	1.61738	0.123723	21.9232	0.353979	51.9754	6.62366	1829.13	236.197	21.9232	0.353979	1.19856
21TMS010	Spot 84	244.481	2698.12	1.06865	17.3775	5.48993	0.0248246	6.33796	0.00347903	1.87974	0.296585	22.3884	0.420114	24.8987	1.55888	274.418	138.768	22.3884	0.420114	8.15849
21TMS010	Spot 85	810.041	5420.79	1.02498	20.8919	1.24295	0.0203075	1.67376	0.00328553	1.05582	0.630808	21.1452	0.222889	20.4133	0.338258	NA	NA	21.1452	0.222889
21TMS010	Spot 86	444.677	5286.31	0.945986	19.9711	1.83264	0.0215698	2.25162	0.00333066	1.1864	0.526912	21.4351	0.253885	21.6687	0.482728	47.665	45.7163	21.4351	0.253885	44.9704
21TMS010	Spot 87	658.432	4960.32	0.85836	20.7771	1.86371	0.0230742	2.41663	0.00373127	1.44289	0.597066	24.0085	0.345771	23.1629	0.553425	NA	NA	24.0085	0.345771
21TMS010	Spot 88	256.159	2731.01	0.992273	19.9549	2.52856	0.0214032	2.88425	0.00349659	1.36573	0.473513	22.5011	0.306769	21.5031	0.613683	NA	NA	22.5011	0.306769
21TMS010	Spot 89	179.74	8045.64	0.794127	5.90232	25.3454	0.087014	25.764	0.00378386	4.6253	0.179526	24.3463	1.12396	84.7179	20.9439	2525.61	433.341	24.3463	1.12396	0.963977
21TMS010	Spot 9	818.396	8246.13	0.757807	20.8705	1.77288	0.0199642	2.12219	0.00316914	1.08926	0.513271	20.3973	0.221828	20.0716	0.421774	NA	NA	20.3973	0.221828
21TMS010	Spot 90	119.51	2752.06	1.78474	20.6572	4.18289	0.0189732	4.60659	0.00322024	1.61303	0.350157	20.7256	0.333774	19.0846	0.870939	NA	NA	20.7256	0.333774
21TMS010	Spot 91	427.959	2289.86	1.04636	21.4817	2.45506	0.0187375	8.62534	0.00341797	1.28937	0.149486	21.9961	0.283128	18.8497	1.61085	NA	NA	21.9961	0.283128
21TMS010	Spot 92	78.9323	4870.28	0.996075	20.1148	4.48323	0.0216753	4.88826	0.00339144	1.9138	0.391509	21.8256	0.416992	21.7736	1.05302	16.0449	NA	21.8256	0.416992	136.028
21TMS010	Spot 94	425.775	4368.54	0.978405	21.7003	2.19127	0.0190431	4.78624	0.0032579	1.46482	0.306048	20.9676	0.306639	19.1542	0.908176	NA	NA	20.9676	0.306639
21TMS010	Spot 95	295.306	4323.51	0.910414	19.9991	2.49743	0.0217422	2.81835	0.00340812	1.25529	0.4454	21.9328	0.274853	21.8401	0.608959	11.6358	NA	21.9328	0.274853	188.494
21TMS010	Spot 97	308.505	1716.61	2.29821	20.6387	2.35878	0.0171767	3.20781	0.00315459	1.43593	0.447635	20.3038	0.291089	17.2928	0.550023	NA	NA	20.3038	0.291089
21TMS010	Spot 98	307.861	5915.24	1.44297	20.8086	3.43261	0.0205713	4.69312	0.00329765	1.63241	0.347831	21.2231	0.345878	20.6758	0.960527	NA	NA	21.2231	0.345878
21TMS010	Spot 99	91.7044	4910.77	1.02969	20.1529	1.54626	0.160642	3.58875	0.0251656	1.01341	0.282385	160.22	1.60367	151.265	5.04357	13.0855	NA	160.22	1.60367	1224.41
21TMS011	Spot 193	156.289	17659.4	1.91099	21.7813	4.67796	0.0142352	4.86916	0.00231444	1.33899	0.274994	14.9026	0.199313	14.3523	0.69392	NA	NA	14.9026	0.199313
21TMS011	Spot 73	440.365	9833.7	0.839767	21.3513	3.0196	0.0143602	3.61727	0.00233196	1.09496	0.302705	15.0153	0.164221	14.4774	0.519972	NA	NA	15.0153	0.164221
21TMS011	Spot 229	282.652	18706.6	2.4959	20.4125	3.71257	0.0153713	3.96593	0.00233591	1.12895	0.284662	15.0407	0.169604	15.489	0.609622	85.717	NA	15.0407	0.169604	17.5469
21TMS011	Spot 57	217.651	8905.53	1.74437	21.2795	3.84336	0.0148438	4.10336	0.00241009	1.39268	0.339401	15.5177	0.215853	14.9613	0.609417	NA	NA	15.5177	0.215853
21TMS011	Spot 124	88.9777	9472.61	1.89212	16.9334	6.42527	0.0190276	6.81905	0.00242549	1.84911	0.271169	15.6168	0.288423	19.1388	1.29286	487.526	144.993	15.6168	0.288423	3.20327
21TMS011	Spot 274	175.997	16466.8	0.924902	18.3187	5.32353	0.0178343	5.49047	0.00243269	1.34233	0.244483	15.6631	0.209995	17.9491	0.976832	336.082	120.706	15.6631	0.209995	4.6605
21TMS011	Spot 123	470.987	38193.1	0.984707	20.3811	2.35191	0.0161688	2.63283	0.0024352	1.18301	0.449331	15.6792	0.185262	16.2862	0.425368	106.916	55.5696	15.6792	0.185262	14.665
21TMS011	Spot 143	46.8734	7130.83	1.48466	24.8776	6.39697	0.0163844	6.70142	0.00315665	1.98888	0.296785	20.317	0.403446	16.5016	1.0969	NA	NA	20.317	0.403446
21TMS011	Spot 302	154.668	14484.3	1.03701	17.9803	3.66097	0.0253239	3.87085	0.00339466	1.24953	0.322805	21.8463	0.272514	25.3933	0.970747	375.382	82.4625	21.8463	0.272514	5.81976
21TMS011	Spot 145	149.968	17326.6	1.44695	20.2744	4.46289	0.0235434	4.77619	0.00356542	1.69818	0.355551	22.9433	0.388926	23.6285	1.11551	93.9258	NA	22.9433	0.388926	24.4271
21TMS011	Spot 141	181.955	7148.12	1.32203	21.579	4.0266	0.0216073	4.3506	0.00358306	1.29854	0.298474	23.0566	0.298865	21.706	0.934321	NA	NA	23.0566	0.298865
21TMS011	Spot 155	346.979	1.09083e+06	2.47601	21.8705	2.54206	0.0224523	2.64356	0.00359784	0.725517	0.274447	23.1516	0.167667	22.5455	0.589436	NA	NA	23.1516	0.167667
21TMS011	Spot 140	102.002	6354.41	1.05462	17.7003	4.65695	0.0267266	4.79934	0.00362028	1.00889	0.210215	23.2957	0.234604	26.7814	1.26853	351.884	106.073	23.2957	0.234604	6.62027
21TMS011	Spot 225	764.533	60038.2	1.62132	19.5325	1.31415	0.0255574	1.60169	0.00367353	0.911953	0.56937	23.6377	0.21517	25.6244	0.405288	216.15	30.4958	23.6377	0.21517	10.9358
21TMS011	Spot 5	94.6134	7257.09	1.25298	18.4333	4.98406	0.0263021	5.19868	0.00369813	1.4387	0.276744	23.7957	0.341717	26.3615	1.35281	266.987	114.673	23.7957	0.341717	8.91269
21TMS011	Spot 181	375.941	40893.6	2.14047	17.604	3.36757	0.0291908	3.55111	0.00378537	1.12671	0.317282	24.356	0.273902	29.2155	1.02269	449.526	74.8256	24.356	0.273902	5.41814
21TMS011	Spot 259	61.051	13733.4	1.39344	9.68369	9.74968	0.0550254	9.98428	0.00394515	2.15065	0.215404	25.382	0.544806	54.3889	5.28751	1645.45	181.3	25.382	0.544806	1.54256
21TMS011	Spot 29	216.765	97905.1	1.3954	20.9029	2.78474	0.025687	3.05569	0.00395854	1.25796	0.411678	25.468	0.319746	25.7528	0.777032	52.4096	NA	25.468	0.319746	48.5942
21TMS011	Spot 80	272.836	13288.2	1.32699	20.7979	2.65343	0.025456	2.86844	0.00398388	1.06814	0.372378	25.6307	0.273229	25.5241	0.723019	15.52	NA	25.6307	0.273229	165.146
21TMS011	Spot 53	217.672	15439.2	1.74655	19.6537	4.16206	0.0281478	4.46412	0.00414838	1.55633	0.34863	26.6868	0.414476	28.1859	1.24095	157.931	97.9547	26.6868	0.414476	16.8978
21TMS011	Spot 250	261.852	84153.6	1.44578	20.7944	2.43782	0.0275382	2.66027	0.00421089	1.06413	0.40001	27.0881	0.287649	27.5837	0.723923	70.982	57.9917	27.0881	0.287649	38.162
21TMS011	Spot 189	197.358	46995.4	1.46623	20.8024	1.81805	0.0904066	2.01461	0.0138514	0.854286	0.424046	88.6789	0.752385	87.882	1.69603	66.2841	43.4208	88.6789	0.752385	133.786
21TMS011	Spot 228	964.554	399325	2.75798	20.4729	0.975488	0.114746	1.46808	0.0172204	1.09711	0.747308	110.065	1.19728	110.298	1.53441	115.349	23.0078	110.065	1.19728	95.4193
21TMS011	Spot 242	386.03	190930	1.79886	19.8451	0.83707	0.18102	1.25523	0.0263348	0.935349	0.74516	167.568	1.54715	168.938	1.95355	188.147	19.4861	167.568	1.54715	89.0621
21TMS011	Spot 38	1085.81	194694	10.6479	19.9464	0.595362	0.180848	0.965534	0.0265405	0.759859	0.786984	168.86	1.26644	168.79	1.50148	167.793	13.9161	168.86	1.26644	100.636
21TMS011	Spot 108	150.843	30175.6	1.87965	18.2539	2.50576	0.201276	2.68037	0.0271544	0.949301	0.354168	172.714	1.61781	186.205	4.56013	360.94	56.5532	172.714	1.61781	47.8512
21TMS011	Spot 100	147.906	156192	1.49202	19.9403	1.40333	0.186394	1.66734	0.027303	0.899942	0.539748	173.646	1.54186	173.548	2.65985	172.182	32.7762	173.646	1.54186	100.851
21TMS011	Spot 82	210.174	59416.6	2.82308	20.0808	1.08003	0.185073	1.29399	0.0274146	0.709793	0.548532	174.347	1.22092	172.416	2.05191	146.037	25.3721	174.347	1.22092	119.386
21TMS011	Spot 204	423.124	357644	1.77148	19.7703	0.824545	0.189483	1.21818	0.0274467	0.896681	0.736082	174.548	1.54414	176.188	1.9704	198.273	19.1553	174.548	1.54414	88.034
21TMS011	Spot 97	286.862	449742	1.61972	19.9433	1.38523	0.188041	1.6644	0.0275146	0.922658	0.554349	174.974	1.5927	174.956	2.67491	174.694	32.3308	174.974	1.5927	100.16
21TMS011	Spot 306	354.22	67254.6	2.19206	19.9899	0.980939	0.190468	1.38076	0.0279929	0.971686	0.703732	177.974	1.7057	177.028	2.24312	164.394	22.9301	177.974	1.7057	108.261
21TMS011	Spot 111	519.711	1.03796e+06	2.11138	20.0887	0.815722	0.19073	1.13928	0.0280755	0.795339	0.698104	178.492	1.40014	177.252	1.85297	160.742	19.0621	178.492	1.40014	111.043
21TMS011	Spot 139	530.935	162946	2.52754	19.979	0.876214	0.192194	1.22631	0.0282371	0.857745	0.699453	179.506	1.51846	178.5	2.00735	165.176	20.4834	179.506	1.51846	108.676
21TMS011	Spot 132	273.527	85980	1.92262	20.1687	0.960542	0.191628	1.39818	0.0284239	1.0159	0.726588	180.676	1.81001	178.017	2.28303	142.847	22.5371	180.676	1.81001	126.482
21TMS011	Spot 26	163.024	115525	2.25326	20.2471	1.30323	0.207111	1.46397	0.0308564	0.666825	0.455491	195.906	1.2867	191.126	2.55046	132.456	30.6454	195.906	1.2867	147.903
21TMS011	Spot 307	101.146	229675	1.71191	17.1689	0.99377	0.659893	1.23368	0.0830231	0.730905	0.59246	514.142	3.61194	514.549	4.98	516.335	21.8041	514.142	3.61194	99.5752
21TMS011	Spot 13	347.242	728674	1.24403	17.0017	0.596061	0.737543	0.981216	0.0919676	0.779415	0.794336	567.163	4.23167	560.971	4.22911	535.923	13.054	567.163	4.23167	105.829
21TMS011	Spot 25	150.745	94806.7	2.71597	16.2051	0.66262	0.882086	0.918417	0.10517	0.635695	0.692164	644.639	3.8997	642.108	4.37063	633.238	14.2929	644.639	3.8997	101.8
21TMS011	Spot 170	957.137	353432	3.32528	15.7932	0.393683	0.924624	0.772704	0.107078	0.664877	0.860455	655.758	4.14556	664.802	3.76933	695.573	8.38594	655.758	4.14556	94.2759
21TMS011	Spot 203	183.926	524699	3.32726	14.7627	0.653869	1.31022	0.985473	0.141626	0.737288	0.748157	853.853	5.89625	850.222	5.67505	840.777	13.6007	853.853	5.89625	101.555
21TMS011	Spot 7	193.905	349594	2.26489	13.768	0.545313	1.58419	0.817442	0.160251	0.60893	0.744921	958.17	5.42168	964.017	5.08831	977.357	11.1255	977.357	11.1255	98.0368
21TMS011	Spot 88	63.3128	175535	2.30414	13.6675	0.824826	1.68333	1.08382	0.168822	0.703073	0.648697	1005.62	6.54634	1002.24	6.90384	994.864	16.7641	994.864	16.7641	101.081
21TMS011	Spot 279	84.2609	117030	2.71949	13.5697	0.744883	1.72676	0.958862	0.171784	0.603693	0.629593	1021.93	5.70518	1018.54	6.16561	1011.25	15.1035	1011.25	15.1035	101.057
21TMS011	Spot 78	147.726	146216	2.2134	13.4639	0.594526	1.75482	0.922171	0.1739	0.70487	0.76436	1033.56	6.73126	1028.94	5.96466	1019.1	12.0406	1019.1	12.0406	101.419
21TMS011	Spot 309	25.9414	108130	2.61388	13.4623	1.00358	1.80209	1.30892	0.177901	0.840296	0.641976	1055.5	8.18126	1046.22	8.54769	1026.87	20.3174	1026.87	20.3174	102.787
21TMS011	Spot 68	38.8759	78286.7	1.79282	13.3604	0.968324	1.82487	1.1851	0.180102	0.68295	0.57628	1067.53	6.71903	1054.44	7.77369	1027.4	19.6077	1027.4	19.6077	103.906
21TMS011	Spot 265	55.8423	361125	3.35208	13.3537	0.770856	1.81275	1.0371	0.177573	0.693785	0.668967	1053.7	6.74424	1050.07	6.78677	1042.51	15.5736	1042.51	15.5736	101.074
21TMS011	Spot 8	121.635	719774	1.90593	13.2841	0.696967	1.83996	1.19754	0.179528	0.973818	0.813184	1064.39	9.55475	1059.85	7.87814	1050.52	14.0653	1050.52	14.0653	101.321
21TMS011	Spot 235	261.15	4.38222e+06	3.91671	13.3203	0.646626	1.87657	1.01954	0.18293	0.788254	0.773144	1082.96	7.85797	1072.85	6.75354	1052.38	13.0478	1052.38	13.0478	102.906
21TMS011	Spot 67	241.211	337802	3.10164	13.2224	0.576467	1.8213	1.0291	0.177486	0.852445	0.828339	1053.23	8.2831	1053.15	6.7457	1053.02	11.6342	1053.02	11.6342	100.019
21TMS011	Spot 311	57.5727	195170	1.71828	13.3055	0.916281	1.82398	1.18362	0.177729	0.748855	0.632682	1054.56	7.28501	1054.12	7.76264	1053.22	18.4852	1053.22	18.4852	100.127
21TMS011	Spot 162	24.141	60882.4	3.62487	13.2634	1.10532	1.77628	1.39381	0.173054	0.843835	0.605418	1028.92	8.02491	1036.82	9.05508	1053.54	22.3486	1053.54	22.3486	97.6628
21TMS011	Spot 211	305.112	1.16932e+06	4.22816	13.2801	0.479694	1.88061	0.94188	0.182902	0.810573	0.860591	1082.81	8.07943	1074.28	6.24375	1057.02	9.65812	1057.02	9.65812	102.44
21TMS011	Spot 223	80.8316	158423	1.41408	13.2261	0.70847	1.88228	0.992323	0.182666	0.693988	0.699357	1081.52	6.9098	1074.86	6.58016	1061.41	14.256	1061.41	14.256	101.895
21TMS011	Spot 164	43.1222	97604.3	2.01179	13.2161	0.907823	1.82518	1.05251	0.177097	0.528426	0.502065	1051.09	5.12509	1054.55	6.90431	1061.72	18.3134	1061.72	18.3134	98.9993
21TMS011	Spot 300	86.4132	266925	3.32738	13.2453	0.654529	1.88742	0.893993	0.183122	0.608919	0.681123	1084.01	6.07559	1076.68	5.93373	1061.89	13.15	1061.89	13.15	102.083
21TMS011	Spot 241	54.4752	167241	1.22967	13.2356	0.908411	1.88564	1.09999	0.182885	0.620229	0.563851	1082.72	6.18168	1076.05	7.29864	1062.59	18.2568	1062.59	18.2568	101.894
21TMS011	Spot 27	117.313	2.12161e+07	2.59527	13.2034	0.578511	1.84084	0.930199	0.178387	0.72842	0.78308	1058.16	7.10848	1060.16	6.12041	1064.3	11.6183	1064.3	11.6183	99.4227
21TMS011	Spot 200	29.7534	58216.9	2.55278	13.1972	0.97386	1.80219	1.27374	0.174639	0.816376	0.640928	1037.62	7.82431	1046.25	8.31809	1064.34	19.6604	1064.34	19.6604	97.4897
21TMS011	Spot 22	428.592	510633	22.7151	13.1913	0.849189	1.78405	1.79034	0.172596	1.57613	0.880351	1026.4	14.9552	1039.66	11.6497	1067.66	17.0604	1067.66	17.0604	96.1353
21TMS011	Spot 212	138.21	246535	2.02285	13.1973	0.58322	1.86827	1.25991	0.180678	1.11671	0.886339	1070.68	11.0162	1069.92	8.33297	1068.39	11.7209	1068.39	11.7209	100.214
21TMS011	Spot 202	225.199	555839	3.74016	13.2067	0.526582	1.8452	0.870389	0.178421	0.693009	0.796206	1058.34	6.764	1061.72	5.73164	1068.68	10.5736	1068.68	10.5736	99.033
21TMS011	Spot 129	66.6805	1.4157e+06	2.18299	13.1904	0.933432	1.89318	1.29816	0.183042	0.902173	0.694964	1083.57	8.99828	1078.7	8.62549	1068.88	18.7478	1068.88	18.7478	101.375
21TMS011	Spot 1	59.2839	109580	2.21517	13.1463	0.719089	1.8976	1.06087	0.183469	0.779877	0.735131	1085.9	7.79382	1080.25	7.05447	1068.89	14.4494	1068.89	14.4494	101.591
21TMS011	Spot 314	79.023	526266	3.07646	13.205	0.571827	1.89696	1.05428	0.183332	0.885728	0.840128	1085.15	8.84606	1080.02	7.00982	1069.71	11.472	1069.71	11.472	101.444
21TMS011	Spot 199	164.519	607297	2.15201	13.194	0.482352	1.84709	0.843165	0.178437	0.691554	0.820188	1058.43	6.7503	1062.39	5.55435	1070.56	9.67329	1070.56	9.67329	98.8672
21TMS011	Spot 21	18.3411	20647.2	1.85191	13.0538	1.15681	1.81757	1.49437	0.175517	0.945566	0.632751	1042.44	9.10123	1051.81	9.78856	1071.35	23.2443	1071.35	23.2443	97.3015
21TMS011	Spot 89	32.6	325779	1.90714	13.149	1.13955	1.89251	1.47072	0.182503	0.929753	0.632174	1080.63	9.25024	1078.46	9.77097	1074.1	22.8839	1074.1	22.8839	100.608
21TMS011	Spot 256	336.707	669397	4.83752	13.1472	0.538511	1.93525	1.02863	0.186523	0.876401	0.852007	1102.51	8.88133	1093.36	6.88633	1075.18	10.8055	1075.18	10.8055	102.542
21TMS011	Spot 136	76.7183	318263	1.59113	13.1361	0.728539	1.89565	1.0928	0.182653	0.814445	0.745283	1081.45	8.10867	1079.57	7.26424	1075.77	14.6093	1075.77	14.6093	100.528
21TMS011	Spot 269	157.427	275000	5.53222	13.1309	0.564073	1.9293	0.882913	0.185779	0.679046	0.769097	1098.47	6.85821	1091.3	5.90457	1077.01	11.3091	1077.01	11.3091	101.992
21TMS011	Spot 303	101.079	457114	2.55948	13.1321	0.506035	1.92901	0.967096	0.185501	0.824125	0.852165	1096.96	8.31298	1091.2	6.46724	1079.69	10.1363	1079.69	10.1363	101.599
21TMS011	Spot 156	57.4179	205078	2.25312	13.1038	0.83985	1.91922	1.18278	0.184378	0.832821	0.704119	1090.85	8.35775	1087.8	7.8959	1081.67	16.8289	1081.67	16.8289	100.849
21TMS011	Spot 6	85.924	3.59213e+06	2.83778	13.0791	0.675096	1.95845	0.961779	0.1881	0.685029	0.712252	1111.07	6.99137	1101.35	6.46486	1082.21	13.5229	1082.21	13.5229	102.667
21TMS011	Spot 130	59.2919	183468	1.86549	13.085	0.854042	1.88001	1.19443	0.180475	0.834603	0.698745	1069.57	8.22545	1074.06	7.9171	1083.21	17.137	1083.21	17.137	98.7411
21TMS011	Spot 31	90.3991	91253.8	0.885754	13.0328	0.656074	1.90416	0.979702	0.182752	0.727255	0.742322	1081.99	7.24392	1082.54	6.52248	1083.67	13.1522	1083.67	13.1522	99.8448
21TMS011	Spot 169	226.579	769396	4.94575	13.0909	0.478564	1.93691	0.916562	0.185854	0.781702	0.852863	1098.87	7.89769	1093.93	6.13785	1084.11	9.58593	1084.11	9.58593	101.362
21TMS011	Spot 234	73.967	140507	3.19156	13.0842	0.55687	1.91854	0.911636	0.183941	0.720747	0.790608	1088.47	7.21855	1087.56	6.08501	1085.75	11.1721	1085.75	11.1721	100.25
21TMS011	Spot 167	34.494	272241	1.30393	13.0664	0.925273	1.92004	1.2489	0.183963	0.838794	0.671625	1088.59	8.40168	1088.08	8.33852	1087.05	18.5272	1087.05	18.5272	100.142
21TMS011	Spot 116	230.28	371732	1.78289	13.0667	0.498211	1.86927	0.81582	0.179087	0.645997	0.791838	1061.99	6.32511	1070.27	5.39671	1087.2	9.9774	1087.2	9.9774	97.6811
21TMS011	Spot 196	160.65	1.43971e+06	3.01361	13.0753	0.524701	1.90009	0.918444	0.181894	0.753809	0.820746	1077.31	7.4786	1081.12	6.11013	1088.78	10.5133	1088.78	10.5133	98.9469
21TMS011	Spot 55	120.148	931041	3.23483	13.0055	0.623884	1.88857	1.12345	0.180766	0.9343	0.831632	1071.16	9.22058	1077.08	7.45836	1089.07	12.5028	1089.07	12.5028	98.3557
21TMS011	Spot 10	18.7557	54006.3	2.12203	13.0091	1.0532	1.82889	1.34463	0.175036	0.834606	0.620697	1039.8	8.01447	1055.88	8.82701	1089.27	21.1064	1089.27	21.1064	95.4584
21TMS011	Spot 230	188.852	372969	2.93907	13.0566	0.516405	1.88273	0.769108	0.180149	0.569953	0.741058	1067.79	5.60857	1075.02	5.1004	1089.71	10.3655	1089.71	10.3655	97.9887
21TMS011	Spot 248	169.358	551071	2.37892	13.0574	0.493226	1.91164	0.92958	0.18289	0.787925	0.847613	1082.74	7.85324	1085.16	6.19713	1089.98	9.88863	1089.98	9.88863	99.336
21TMS011	Spot 254	89.8583	175996	1.23832	13.0371	0.542427	2.01174	0.816064	0.192339	0.609528	0.746911	1134.03	6.33839	1119.48	5.53494	1091.36	10.8609	1091.36	10.8609	103.91
21TMS011	Spot 2	363.423	2.14459e+06	3.19789	13.0196	0.448007	1.88372	0.980758	0.18008	0.872454	0.889571	1067.41	8.58254	1075.37	6.5052	1091.56	8.95685	1091.56	8.95685	97.7881
21TMS011	Spot 96	71.8949	71517.5	2.94485	12.9988	0.745176	1.9076	1.0522	0.182339	0.74282	0.705969	1079.74	7.38483	1083.75	7.0095	1091.82	14.9251	1091.82	14.9251	98.8939
21TMS011	Spot 266	35.0396	2.81111e+06	1.92938	13.0362	1.12966	1.86802	1.37023	0.178555	0.775493	0.565959	1059.07	7.57386	1069.83	9.0622	1091.85	22.6261	1091.85	22.6261	96.9983
21TMS011	Spot 180	79.5744	363753	2.44198	13.0449	0.494129	1.93646	0.870936	0.185005	0.717192	0.823472	1094.26	7.218	1093.78	5.83184	1092.83	9.89555	1092.83	9.89555	100.131
21TMS011	Spot 236	43.7389	50670.7	3.02392	13.0028	0.905901	1.90717	1.2031	0.182137	0.791224	0.657656	1078.64	7.85864	1083.6	8.01417	1093.57	18.1433	1093.57	18.1433	98.6348
21TMS011	Spot 205	351.291	1.04194e+06	4.94027	13.0488	0.368915	1.92281	0.885236	0.183612	0.804701	0.909024	1086.68	8.04721	1089.04	5.91329	1093.79	7.39474	1093.79	7.39474	99.3496
21TMS011	Spot 216	176.056	302276	1.35071	13.0264	0.563774	1.97808	0.784373	0.188826	0.545329	0.695242	1115.01	5.58368	1108.07	5.2901	1094.44	11.2732	1094.44	11.2732	101.88
21TMS011	Spot 287	290.208	251545	2.45422	13.0058	0.514048	1.94149	0.819568	0.184995	0.638311	0.778839	1094.2	6.42382	1095.51	5.49271	1098.12	10.2708	1098.12	10.2708	99.6431
21TMS011	Spot 137	109.422	134954	2.5262	12.9776	0.575627	1.95439	1.00447	0.186186	0.821845	0.818192	1100.68	8.31578	1099.96	6.74706	1098.51	11.544	1098.51	11.544	100.198
21TMS011	Spot 247	165.922	223179	1.97998	12.9832	0.515095	1.96312	0.818084	0.186773	0.635495	0.776808	1103.87	6.44728	1102.95	5.50338	1101.15	10.3036	1101.15	10.3036	100.247
21TMS011	Spot 158	92.5908	635852	2.83813	12.9838	0.720896	1.96021	0.905627	0.186477	0.548145	0.605266	1102.26	5.55367	1101.95	6.08926	1101.33	14.4216	1101.33	14.4216	100.085
21TMS011	Spot 261	176.349	919711	2.2199	12.9505	0.525583	1.98293	0.941436	0.188375	0.781064	0.829652	1112.57	7.98132	1109.72	6.35463	1104.14	10.5185	1104.14	10.5185	100.763
21TMS011	Spot 198	54.7141	102344	4.26465	12.9484	0.666947	2.00672	1.00396	0.190555	0.750382	0.747425	1124.38	7.74235	1117.78	6.8037	1104.99	13.3335	1104.99	13.3335	101.755
21TMS011	Spot 218	28.7624	338280	2.38888	12.9504	1.27294	1.93191	1.46679	0.18344	0.728751	0.496836	1085.74	7.28192	1092.2	9.814	1105.08	25.443	1105.08	25.443	98.2496
21TMS011	Spot 127	128.477	350535	2.39699	12.9411	0.592415	2.02484	0.954776	0.192186	0.748706	0.78417	1133.21	7.7805	1123.89	6.48971	1105.89	11.8613	1105.89	11.8613	102.47
21TMS011	Spot 240	22.5547	217305	2.43711	12.8948	1.22427	1.98675	1.45882	0.187676	0.793104	0.543662	1108.77	8.07904	1111.02	9.85347	1115.43	24.432	1115.43	24.432	99.4034
21TMS011	Spot 142	109.951	175333	2.56155	12.7845	0.606662	2.09651	0.97902	0.196948	0.767985	0.784443	1158.91	8.14606	1147.66	6.73058	1126.46	12.092	1126.46	12.092	102.88
21TMS011	Spot 91	49.1562	148675	1.56638	12.7154	0.760842	2.11961	1.02437	0.197945	0.685872	0.669551	1164.27	7.30583	1155.21	7.06727	1138.26	15.1351	1138.26	15.1351	102.285
21TMS011	Spot 28	444.512	333076	2.10604	12.7171	0.491612	1.95443	0.879817	0.182516	0.729653	0.829324	1080.7	7.25986	1099.97	5.90981	1138.29	9.78723	1138.29	9.78723	94.941
21TMS011	Spot 11	52.7439	343339	2.99332	12.729	0.754343	2.02876	1.19646	0.189435	0.928696	0.776204	1118.31	9.53481	1125.2	8.13772	1138.54	14.9969	1138.54	14.9969	98.2235
21TMS011	Spot 122	28.4139	229417	2.90286	12.5325	1.14112	2.0523	1.40157	0.188716	0.813755	0.580601	1114.42	8.32805	1133.06	9.56913	1168.97	22.5807	1168.97	22.5807	95.3331
21TMS011	Spot 135	122.596	392385	1.69134	12.4154	0.581669	2.18297	0.971684	0.198769	0.778342	0.801024	1168.71	8.31961	1175.63	6.76669	1188.4	11.4709	1188.4	11.4709	98.343
21TMS011	Spot 222	33.2915	317344	1.37112	12.3596	0.763866	2.28882	1.04863	0.207417	0.718397	0.685079	1215.04	7.95554	1208.84	7.41024	1197.8	15.0641	1197.8	15.0641	101.439
21TMS011	Spot 213	249.409	3.64095e+06	4.26388	12.3381	0.563353	2.29346	0.910221	0.207212	0.714937	0.785455	1213.95	7.91076	1210.27	6.43608	1203.74	11.1098	1203.74	11.1098	100.848
21TMS011	Spot 270	259.201	306294	180.093	12.2578	0.536313	2.2862	0.754983	0.205507	0.531358	0.703801	1204.84	5.83932	1208.03	5.33324	1213.77	10.5519	1213.77	10.5519	99.2641
21TMS011	Spot 85	81.6429	1.92294e+06	2.12073	12.2426	0.585091	2.37329	1.00048	0.213114	0.811562	0.811171	1245.39	9.19074	1234.59	7.14732	1215.78	11.5079	1215.78	11.5079	102.435
21TMS011	Spot 119	111.655	1.86653e+06	1.77111	12.1631	0.662828	2.28615	0.932218	0.203821	0.655507	0.703169	1195.82	7.15457	1208.02	6.58523	1229.91	13.0213	1229.91	13.0213	97.2277
21TMS011	Spot 301	30.9147	254141	1.01605	12.1634	0.733705	2.35504	0.999616	0.20982	0.678811	0.679072	1227.86	7.58917	1229.08	7.12477	1231.25	14.4085	1231.25	14.4085	99.7245
21TMS011	Spot 281	147.689	4.00084e+06	2.81443	12.1605	0.557036	2.44692	0.761425	0.217666	0.519113	0.681766	1269.53	5.98195	1256.52	5.48845	1234.31	10.9442	1234.31	10.9442	102.853
21TMS011	Spot 66	72.2572	748929	2.27217	12.0065	0.560577	2.3875	0.839377	0.211198	0.624739	0.744289	1235.2	7.02249	1238.86	6.00698	1245.26	10.98	1245.26	10.98	99.1919
21TMS011	Spot 12	76.7062	173897	2.74712	11.9381	0.650776	2.41596	1.08055	0.211667	0.862591	0.798287	1237.69	9.71389	1247.36	7.76	1264.1	12.7121	1264.1	12.7121	97.9111
21TMS011	Spot 94	140.855	530931	2.17886	11.9138	0.555827	2.50116	0.817225	0.218751	0.599086	0.733074	1275.27	6.93176	1272.37	5.92797	1267.45	10.8335	1267.45	10.8335	100.617
21TMS011	Spot 35	157.533	527429	1.45241	11.8524	0.444954	2.58129	0.751563	0.22483	0.605688	0.805905	1307.35	7.16715	1295.35	5.50043	1275.5	8.67152	1275.5	8.67152	102.497
21TMS011	Spot 54	36.2174	82375.4	0.738935	11.6992	0.793824	2.65019	1.08822	0.228596	0.741804	0.681665	1327.14	8.89748	1314.7	8.02266	1294.45	15.4859	1294.45	15.4859	102.525
21TMS011	Spot 79	18.213	21146.5	2.05738	11.4516	1.96095	2.20494	2.07893	0.187023	0.683935	0.328985	1105.23	6.94657	1182.61	14.5236	1327.03	38.0124	1327.03	38.0124	83.2859
21TMS011	Spot 217	80.233	271347	2.77662	11.5163	0.582677	2.78926	0.910805	0.235389	0.699959	0.768506	1362.68	8.59753	1352.66	6.80764	1336.84	11.2665	1336.84	11.2665	101.933
21TMS011	Spot 285	109.323	193636	1.94356	11.4874	0.72316	2.7809	1.02681	0.234033	0.728928	0.709898	1355.6	8.91157	1350.42	7.66862	1342.21	13.9706	1342.21	13.9706	100.998
21TMS011	Spot 172	193.962	153887	3.86451	11.4634	0.452556	2.70001	0.865181	0.227048	0.737381	0.852285	1319.01	8.79561	1328.46	6.4107	1343.72	8.74126	1343.72	8.74126	98.1609
21TMS011	Spot 148	30.7501	414079	1.91165	11.4506	0.718288	2.7061	1.62036	0.227546	1.45245	0.896378	1321.63	17.3561	1330.13	12.014	1343.84	13.873	1343.84	13.873	98.3472
21TMS011	Spot 4	16.0384	332579	1.48267	11.4208	1.21235	2.85283	1.48224	0.23933	0.852786	0.575336	1383.21	10.6162	1369.56	11.1445	1348.3	23.4019	1348.3	23.4019	102.589
21TMS011	Spot 45	113.004	216054	2.44316	11.3772	0.706406	2.81266	0.991837	0.235414	0.696206	0.701936	1362.81	8.55216	1358.91	7.42963	1352.77	13.6273	1352.77	13.6273	100.742
21TMS011	Spot 210	56.5193	1.58119e+06	2.56192	11.3551	0.731937	2.81501	1.02735	0.234081	0.720909	0.701719	1355.85	8.81497	1359.54	7.69732	1365.33	14.0953	1365.33	14.0953	99.3056
21TMS011	Spot 65	75.3177	365063	2.86822	11.2599	0.577516	2.83197	0.981281	0.234984	0.793334	0.808467	1360.57	9.73087	1364.04	7.36372	1369.48	11.1156	1369.48	11.1156	99.3495
21TMS011	Spot 168	50.7732	88947.6	2.22101	11.2947	0.602487	2.7872	0.907885	0.231091	0.679158	0.748066	1340.21	8.21829	1352.11	6.78449	1370.96	11.5939	1370.96	11.5939	97.757
21TMS011	Spot 197	78.1065	317767	1.08631	11.313	0.557942	2.84408	0.815313	0.235655	0.594456	0.729114	1364.07	7.30831	1367.25	6.12504	1372.21	10.7358	1372.21	10.7358	99.4068
21TMS011	Spot 219	110.767	188223	2.50685	11.2904	0.661398	2.82561	0.991794	0.233978	0.738806	0.744919	1355.31	9.0306	1362.36	7.43825	1373.41	12.7284	1373.41	12.7284	98.6823
21TMS011	Spot 207	102.809	149925	0.9966	11.2732	0.606453	2.87346	0.871366	0.237262	0.625411	0.717736	1372.45	7.73126	1374.98	6.56361	1378.89	11.6616	1378.89	11.6616	99.5324
21TMS011	Spot 144	134.761	399546	2.07101	11.1703	0.509229	3.06115	0.709893	0.2511	0.494561	0.69667	1444.15	6.39872	1423.03	5.43328	1391.55	9.7712	1391.55	9.7712	103.78
21TMS011	Spot 106	317.346	899944	2.10421	11.1102	0.439901	2.97791	0.812251	0.242464	0.682815	0.840646	1399.49	8.58984	1402	6.17422	1405.79	8.4239	1405.79	8.4239	99.5525
21TMS011	Spot 62	89.57	3.88937e+06	2.78577	11.0457	0.699061	3.07084	1.21828	0.249848	0.997759	0.818989	1437.69	12.8577	1425.44	9.33174	1407.19	13.3842	1407.19	13.3842	102.168
21TMS011	Spot 101	110.81	1.19476e+06	2.46744	11.0605	0.580011	3.1648	0.953759	0.256724	0.757128	0.793836	1473.06	9.97043	1448.61	7.35916	1412.91	11.0962	1412.91	11.0962	104.257
21TMS011	Spot 191	93.7354	105884	2.61937	11.0524	0.550204	2.97079	0.731133	0.240961	0.481483	0.658543	1391.69	6.02681	1400.18	5.55426	1413.11	10.5257	1413.11	10.5257	98.4842
21TMS011	Spot 50	253.928	488816	2.10203	11.0039	0.405658	3.0258	0.780702	0.245076	0.667016	0.854381	1413.03	8.46369	1414.15	5.9581	1415.81	7.75814	1415.81	7.75814	99.8037
21TMS011	Spot 24	137.712	391419	2.24132	11.037	0.573796	3.07925	0.899143	0.249255	0.69222	0.769866	1434.63	8.90337	1427.54	6.89175	1416.97	10.972	1416.97	10.972	101.247
21TMS011	Spot 34	188.862	981293	3.50206	10.9981	0.549907	3.06552	0.965738	0.247895	0.793884	0.822049	1427.61	10.1664	1424.12	7.39409	1418.88	10.5117	1418.88	10.5117	100.616
21TMS011	Spot 273	118.431	338759	2.51432	11.0332	0.530508	3.03592	1.03171	0.245459	0.884859	0.857664	1415.02	11.242	1416.7	7.8803	1419.2	10.1406	1419.2	10.1406	99.7049
21TMS011	Spot 277	86.7651	499637	5.15747	11.0308	0.69271	3.10468	0.892084	0.250933	0.562107	0.630105	1443.29	7.26878	1433.85	6.85141	1419.86	13.2398	1419.86	13.2398	101.65
21TMS011	Spot 51	129.245	818970	2.75159	10.9773	0.533964	3.05046	0.879457	0.246407	0.698802	0.794584	1419.92	8.90566	1420.35	6.7253	1420.97	10.2041	1420.97	10.2041	99.926
21TMS011	Spot 299	82.8111	5.16433e+07	3.35487	11.0309	0.523872	3.10957	0.757884	0.251156	0.547674	0.722636	1444.43	7.08717	1435.06	5.82293	1421.17	10.0109	1421.17	10.0109	101.637
21TMS011	Spot 267	103.044	276990	2.55123	11.0074	0.542137	3.14593	0.833951	0.254029	0.633686	0.75986	1459.22	8.27501	1444	6.42545	1421.65	10.3593	1421.65	10.3593	102.643
21TMS011	Spot 201	24.2363	186315	2.10292	11.0179	0.958197	3.09868	1.19126	0.250089	0.707754	0.594123	1438.94	9.12757	1432.37	9.14493	1422.6	18.3078	1422.6	18.3078	101.149
21TMS011	Spot 113	94.9763	373490	4.1735	11.007	0.616406	3.08549	0.874863	0.248733	0.620819	0.709619	1431.94	7.97163	1429.09	6.70898	1424.84	11.7736	1424.84	11.7736	100.498
21TMS011	Spot 125	255.111	530881	2.93803	10.9929	0.390724	3.09438	0.749786	0.249338	0.639924	0.853475	1435.06	8.23295	1431.3	5.75384	1425.69	7.46223	1425.69	7.46223	100.657
21TMS011	Spot 275	258.834	3.35962e+06	3.24578	10.9984	0.442686	3.07253	0.761251	0.247542	0.6193	0.813529	1425.79	7.92159	1425.87	5.83169	1425.97	8.45398	1425.97	8.45398	99.9872
21TMS011	Spot 238	139.51	1.87975e+06	1.99839	11.004	0.498889	3.07458	0.723517	0.247685	0.52401	0.724254	1426.53	6.70583	1426.38	5.54352	1426.14	9.52709	1426.14	9.52709	100.027
21TMS011	Spot 195	232.417	919026	2.37095	11.0009	0.517454	3.0109	0.981776	0.242514	0.834341	0.849828	1399.75	10.4978	1410.38	7.4835	1426.46	9.8812	1426.46	9.8812	98.1279
21TMS011	Spot 290	115.437	242907	3.55737	10.9965	0.505932	3.05905	0.861556	0.246382	0.697351	0.809409	1419.79	8.88643	1422.5	6.59298	1426.54	9.66131	1426.54	9.66131	99.527
21TMS011	Spot 184	80.2006	240024	1.2335	10.9935	0.594054	3.07246	1.0512	0.24724	0.867204	0.824969	1424.23	11.0818	1425.85	8.05289	1428.25	11.3423	1428.25	11.3423	99.7186
21TMS011	Spot 165	208.595	1.50044e+06	1.34392	10.9703	0.442858	3.04734	0.841604	0.244992	0.715663	0.850356	1412.6	9.07847	1419.57	6.4342	1430.02	8.45263	1430.02	8.45263	98.7817
21TMS011	Spot 133	217.502	1.24354e+07	2.07921	10.9596	0.475193	3.1342	0.866636	0.25173	0.724742	0.83627	1447.39	9.39564	1441.13	6.67127	1431.87	9.06752	1431.87	9.06752	101.084
21TMS011	Spot 150	141.674	461923	2.63721	10.9631	0.755661	3.10051	0.99749	0.248978	0.65111	0.652749	1433.2	8.36717	1432.82	7.65847	1432.23	14.419	1432.23	14.419	100.068
21TMS011	Spot 289	84.5419	768305	4.21986	10.9587	0.646477	3.17211	1.07577	0.254542	0.859851	0.799289	1461.85	11.2465	1450.4	8.30523	1433.62	12.3331	1433.62	12.3331	101.969
21TMS011	Spot 63	119.293	303983	1.77515	10.8688	0.551493	3.09272	0.919922	0.247955	0.736253	0.800343	1427.92	9.43019	1430.89	7.05857	1435.28	10.5194	1435.28	10.5194	99.4872
21TMS011	Spot 262	105.629	1.33861e+06	3.16312	10.9269	0.570336	3.09064	0.856614	0.247708	0.639143	0.746127	1426.65	8.17983	1430.37	6.57171	1435.9	10.8771	1435.9	10.8771	99.3558
21TMS011	Spot 154	137.692	150949	2.60258	10.9001	0.566814	3.14632	0.866404	0.251459	0.655265	0.756304	1445.99	8.48761	1444.1	6.6757	1441.3	10.8022	1441.3	10.8022	100.326
21TMS011	Spot 249	84.6036	219919	2.77891	10.8927	0.784915	3.12028	1.07201	0.24912	0.729981	0.680946	1433.94	9.38501	1437.7	8.24338	1443.26	14.9576	1443.26	14.9576	99.354
21TMS011	Spot 81	415.178	2.45058e+06	5.54301	10.8577	0.463289	3.04046	0.901678	0.242326	0.773555	0.857906	1398.78	9.72688	1417.84	6.88964	1446.57	8.82282	1446.57	8.82282	96.6958
21TMS011	Spot 23	80.326	1.83522e+06	1.95107	10.8545	0.663203	3.05766	0.886376	0.24334	0.588069	0.663452	1404.04	7.41941	1422.15	6.78216	1449.36	12.6253	1449.36	12.6253	96.8729
21TMS011	Spot 227	64.9094	226613	2.53466	10.8428	0.586492	3.20532	0.800743	0.254698	0.545027	0.680652	1462.66	7.1322	1458.44	6.19727	1452.29	11.1631	1452.29	11.1631	100.714
21TMS011	Spot 260	122.912	195844	2.50816	10.8074	0.501404	3.26994	0.841748	0.259382	0.675869	0.802936	1486.68	8.97354	1473.93	6.5454	1455.6	9.54342	1455.6	9.54342	102.135
21TMS011	Spot 151	233.785	8.68201e+06	3.21374	10.8231	0.495716	3.14225	0.819607	0.249028	0.652703	0.796361	1433.46	8.38901	1443.1	6.31314	1457.31	9.4267	1457.31	9.4267	98.3634
21TMS011	Spot 153	319.225	1.03651e+06	1.50596	10.0096	0.413362	3.60094	0.787515	0.263961	0.670306	0.851166	1510.07	9.02396	1549.74	6.25841	1604.23	7.70942	1604.23	7.70942	94.1306
21TMS011	Spot 296	65.0087	305630	1.79066	9.8903	0.678368	4.08656	0.902845	0.296067	0.595731	0.659838	1671.78	8.77266	1651.62	7.3652	1626.06	12.6153	1626.06	12.6153	102.811
21TMS011	Spot 152	74.0302	173392	1.30882	9.86809	0.635857	3.97455	1.02236	0.287415	0.800331	0.78283	1628.6	11.5181	1629.02	8.29423	1629.54	11.8241	1629.54	11.8241	99.9424
21TMS011	Spot 105	158.744	340801	3.9247	9.80334	0.444773	3.8899	0.738959	0.279527	0.590114	0.798575	1588.98	8.31053	1611.59	5.96889	1641.24	8.25575	1641.24	8.25575	96.816
21TMS011	Spot 36	196.443	976748	1.41909	9.77734	0.5418	3.95814	0.918293	0.284345	0.741427	0.807397	1613.21	10.5816	1625.66	7.44375	1641.79	10.056	1641.79	10.056	98.259
21TMS011	Spot 312	61.1081	4.11465e+06	3.05261	9.79812	0.636804	4.03805	0.945147	0.289478	0.698415	0.738948	1638.92	10.1073	1641.89	7.69213	1645.68	11.8134	1645.68	11.8134	99.589
21TMS011	Spot 56	73.855	2.68245e+06	2.29497	9.73337	0.622664	4.18641	1.13254	0.299915	0.946012	0.8353	1690.89	14.0701	1671.36	9.28263	1646.91	11.5493	1646.91	11.5493	102.67
21TMS011	Spot 224	408.551	1.03992e+08	2.23963	9.77304	0.442212	4.0509	0.957763	0.28994	0.849564	0.887029	1641.23	12.3099	1644.48	7.79972	1648.62	8.20037	1648.62	8.20037	99.5517
21TMS011	Spot 114	92.8772	889448	1.27928	9.75573	0.4747	4.11708	0.894749	0.29439	0.758442	0.847659	1663.43	11.1199	1657.7	7.3098	1650.42	8.80083	1650.42	8.80083	100.788
21TMS011	Spot 192	132.391	140363	2.1764	9.74082	0.512502	4.14385	0.858345	0.296072	0.688545	0.802178	1671.8	10.1396	1663	7.02125	1651.88	9.49993	1651.88	9.49993	101.206
21TMS011	Spot 177	72.8716	329905	2.00851	9.72787	0.606721	3.95698	1.02356	0.282137	0.824336	0.805364	1602.12	11.6936	1625.42	8.29656	1655.71	11.2396	1655.71	11.2396	96.7634
21TMS011	Spot 149	59.6417	389251	1.72718	9.72599	0.634884	4.03706	0.823335	0.287605	0.524213	0.636695	1629.55	7.54814	1641.69	6.7004	1657.27	11.7587	1657.27	11.7587	98.3276
21TMS011	Spot 115	80.937	178984	3.55445	9.65708	0.609158	4.25253	0.908073	0.301178	0.673425	0.741598	1697.15	10.0483	1684.23	7.46513	1668.15	11.2668	1668.15	11.2668	101.738
21TMS011	Spot 58	128.803	2.15449e+06	3.91203	9.61671	0.593008	4.23477	0.881882	0.299747	0.652731	0.740156	1690.05	9.70394	1680.79	7.24403	1669.22	10.9662	1669.22	10.9662	101.248
21TMS011	Spot 46	126.818	2.4207e+07	2.63606	9.61579	0.53506	4.23088	0.818794	0.29927	0.619785	0.756949	1687.69	9.20288	1680.03	6.72461	1670.47	9.89287	1670.47	9.89287	101.031
21TMS011	Spot 40	85.6613	363777	3.13445	9.61531	0.480131	4.20901	0.986513	0.297532	0.86178	0.873562	1679.06	12.7389	1675.78	8.09407	1671.66	8.87609	1671.66	8.87609	100.443
21TMS011	Spot 47	98.0349	287413	4.34765	9.60315	0.654939	4.20076	1.00263	0.296882	0.759126	0.757132	1675.83	11.2025	1674.17	8.22324	1672.07	12.1081	1672.07	12.1081	100.225
21TMS011	Spot 237	84.4759	322339	1.76681	9.64936	0.634227	4.19649	1.02571	0.29645	0.806075	0.78587	1673.68	11.882	1673.34	8.41087	1672.89	11.7243	1672.89	11.7243	100.047
21TMS011	Spot 104	158.373	882407	2.20747	9.62915	0.486451	4.15416	0.84726	0.293133	0.693694	0.818751	1657.17	10.137	1665.03	6.93391	1674.94	8.99058	1674.94	8.99058	98.9389
21TMS011	Spot 183	36.1188	183863	6.10425	9.63239	0.588516	4.25031	1.04515	0.299901	0.863691	0.826379	1690.82	12.8453	1683.8	8.59123	1675.04	10.8772	1675.04	10.8772	100.942
21TMS011	Spot 257	131.726	1.2628e+06	2.28202	9.61299	0.554747	4.23118	0.969186	0.298131	0.794718	0.819985	1682.04	11.7658	1680.09	7.9599	1677.64	10.2493	1677.64	10.2493	100.262
21TMS011	Spot 138	253.111	995950	2.48083	9.58344	0.494883	4.10227	0.915619	0.288518	0.770356	0.841349	1634.12	11.1197	1654.76	7.47504	1681.04	9.1393	1681.04	9.1393	97.2088
21TMS011	Spot 174	223.416	1.74038e+06	3.09263	9.59441	0.512908	4.24794	0.797673	0.29863	0.610906	0.765861	1684.51	9.05609	1683.34	6.55617	1681.86	9.47117	1681.86	9.47117	100.157
21TMS011	Spot 176	207.606	697744	4.28624	9.58782	0.621868	4.30841	1.1376	0.302707	0.952574	0.837357	1704.72	14.269	1694.97	9.37524	1682.92	11.4818	1682.92	11.4818	101.295
21TMS011	Spot 157	113.557	390454	2.99302	9.574	0.535893	4.34109	0.915338	0.304532	0.742053	0.810688	1713.74	11.1669	1701.2	7.5542	1685.78	9.891	1685.78	9.891	101.659
21TMS011	Spot 159	95.1805	435415	4.41992	9.55301	0.564971	4.33253	0.940757	0.303167	0.752208	0.799577	1706.99	11.2808	1699.57	7.76112	1690.42	10.4214	1690.42	10.4214	100.98
21TMS011	Spot 15	145.089	334427	2.02073	9.54204	0.509808	4.13397	1.12027	0.28921	0.997523	0.890432	1637.58	14.4255	1661.05	9.15964	1690.82	9.40403	1690.82	9.40403	96.8509
21TMS011	Spot 110	41.6674	396141	4.16664	9.50539	0.655325	4.2853	0.894165	0.298487	0.608327	0.680329	1683.8	9.01454	1690.54	7.36151	1698.89	12.0735	1698.89	12.0735	99.1118
21TMS011	Spot 188	97.5458	1.06423e+06	4.32755	9.50847	0.561739	4.41951	0.972968	0.307587	0.794428	0.816499	1728.82	12.0468	1716	8.0566	1700.38	10.3468	1700.38	10.3468	101.673
21TMS011	Spot 118	550.083	1.45214e+07	4.20021	9.47838	0.4867	4.32705	0.942937	0.300371	0.807623	0.856496	1693.15	12.0259	1698.53	7.77726	1705.16	8.95901	1705.16	8.95901	99.2954
21TMS011	Spot 171	122.843	267068	3.65592	9.46413	0.599716	4.32505	1.01675	0.300102	0.821051	0.807524	1691.82	12.2175	1698.15	8.38537	1705.96	11.0387	1705.96	11.0387	99.1711
21TMS011	Spot 102	41.1592	379032	3.33559	9.4658	0.643459	4.41065	0.892719	0.306011	0.618787	0.693149	1721.05	9.34652	1714.34	7.38934	1706.14	11.8439	1706.14	11.8439	100.874
21TMS011	Spot 92	107.776	360827	4.70428	9.44528	0.608803	4.34652	0.991233	0.301262	0.782238	0.789156	1697.56	11.6745	1702.23	8.18249	1707.97	11.2032	1707.97	11.2032	99.3905
21TMS011	Spot 84	103.168	390278	4.50569	9.43123	0.535882	4.45421	0.842606	0.308198	0.650241	0.771702	1731.84	9.87528	1722.48	6.98715	1711.12	9.85718	1711.12	9.85718	101.211
21TMS011	Spot 48	148.48	594672	2.92088	9.38578	0.533755	4.3279	0.975718	0.298872	0.816779	0.837106	1685.71	12.1155	1698.69	8.04793	1714.73	9.81533	1714.73	9.81533	98.3081
21TMS011	Spot 99	147.63	949212	2.48784	9.37801	0.551242	4.40005	0.894333	0.302591	0.704246	0.787454	1704.15	10.5461	1712.35	7.3994	1722.38	10.1271	1722.38	10.1271	98.941
21TMS011	Spot 76	132.117	327753	1.83478	9.32925	0.474666	4.29351	0.839	0.294866	0.691791	0.824543	1665.8	10.1553	1692.12	6.90983	1724.86	8.71827	1724.86	8.71827	96.5759
21TMS011	Spot 283	107.412	326854	6.02046	9.37444	0.455932	4.46326	0.886409	0.306245	0.760134	0.857544	1722.2	11.4882	1724.17	7.35312	1726.54	8.37257	1726.54	8.37257	99.749
21TMS011	Spot 70	135.29	959747	1.50938	9.26797	0.553862	4.58891	0.797567	0.313447	0.573889	0.71955	1757.65	8.82873	1747.26	6.64945	1734.83	10.1576	1734.83	10.1576	101.315
21TMS011	Spot 185	638.249	849958	1.2173	9.32985	0.396728	4.18272	0.863041	0.285646	0.766449	0.88808	1619.74	10.9776	1670.64	7.07244	1735.19	7.27497	1735.19	7.27497	93.3465
21TMS011	Spot 72	159.461	1.55968e+06	1.84026	9.26643	0.462584	4.56367	0.761166	0.311312	0.604474	0.794143	1747.16	9.25095	1742.66	6.33969	1737.25	8.48069	1737.25	8.48069	100.571
21TMS011	Spot 161	93.3077	381486	3.87433	9.30938	0.449592	4.45746	0.701948	0.303964	0.539065	0.767956	1710.93	8.10058	1723.09	5.82152	1737.87	8.24195	1737.87	8.24195	98.4501
21TMS011	Spot 182	32.1817	173095	7.08079	9.30158	0.877428	4.49801	1.16034	0.306483	0.759268	0.654351	1723.38	11.482	1730.6	9.63923	1739.34	16.084	1739.34	16.084	99.0824
21TMS011	Spot 286	266.274	7.41977e+06	3.89784	9.28649	0.616996	4.46172	0.992269	0.303339	0.777119	0.783174	1707.84	11.6594	1723.88	8.23079	1743.39	11.3036	1743.39	11.3036	97.961
21TMS011	Spot 32	126.137	1.20778e+06	0.824675	9.21202	0.538518	4.65927	0.896608	0.315472	0.716871	0.799537	1767.58	11.0825	1759.96	7.49545	1750.91	9.85636	1750.91	9.85636	100.952
21TMS011	Spot 251	30.1972	83627.4	1.69519	9.21812	0.590271	4.67534	0.959157	0.316235	0.753398	0.78548	1771.31	11.6686	1762.84	8.02324	1752.79	10.8623	1752.79	10.8623	101.057
21TMS011	Spot 42	218.201	413215	2.06593	9.19552	0.485754	4.72555	0.795381	0.319442	0.629798	0.791819	1787	9.82927	1771.78	6.66571	1753.87	8.88948	1753.87	8.88948	101.889
21TMS011	Spot 74	132.194	2.10961e+06	1.46241	9.1798	0.440872	4.67109	0.791222	0.315654	0.657012	0.830376	1768.47	10.1616	1762.08	6.61738	1754.49	8.067	1754.49	8.067	100.797
21TMS011	Spot 226	77.311	373482	1.58158	9.2234	0.536822	4.71712	0.863278	0.318743	0.676052	0.783123	1783.59	10.5337	1770.29	7.23248	1754.61	9.82295	1754.61	9.82295	101.651
21TMS011	Spot 221	166.773	1.62165e+06	2.64204	9.21853	0.435537	4.61429	1.18031	0.311738	1.09701	0.929428	1749.26	16.8064	1751.86	9.8503	1754.94	7.96894	1754.94	7.96894	99.6759
21TMS011	Spot 231	145.565	328762	3.14577	9.21233	0.576994	4.62612	0.871342	0.312283	0.652918	0.749324	1751.93	10.0161	1753.99	7.27501	1756.43	10.5554	1756.43	10.5554	99.7439
21TMS011	Spot 61	127.093	1.69747e+06	1.54667	9.15297	0.454162	4.67113	0.690241	0.314937	0.519779	0.753039	1764.96	8.02519	1762.08	5.77282	1758.67	8.30585	1758.67	8.30585	100.358
21TMS011	Spot 178	216.664	3.33908e+06	0.99218	9.18831	0.444691	4.20091	0.769888	0.282813	0.628473	0.816317	1605.51	8.93184	1674.2	6.31433	1761.39	8.12988	1761.39	8.12988	91.1506
21TMS011	Spot 134	40.4522	55169.6	0.940286	9.1513	0.610632	4.65115	0.846353	0.31273	0.58603	0.692417	1754.13	8.99979	1758.5	7.07314	1763.68	11.1607	1763.68	11.1607	99.4581
21TMS011	Spot 109	242.829	958413	3.51725	9.16204	0.470794	4.66919	0.866509	0.313418	0.727455	0.839524	1757.5	11.1904	1761.74	7.24655	1766.74	8.60137	1766.74	8.60137	99.4771
21TMS011	Spot 305	299.757	2.18068e+06	2.99114	9.16702	0.411124	4.59913	0.735564	0.308632	0.609944	0.82922	1733.97	9.27325	1749.11	6.13495	1767.24	7.51073	1767.24	7.51073	98.1177
21TMS011	Spot 103	172.904	473347	4.23255	9.15367	0.531356	4.79741	0.774713	0.321844	0.563761	0.727703	1798.73	8.84868	1784.45	6.50953	1767.77	9.70685	1767.77	9.70685	101.751
21TMS011	Spot 194	265.256	370457	2.62601	9.15473	0.400375	4.6072	0.805101	0.309023	0.698489	0.867579	1735.9	10.6297	1750.57	6.71704	1768.12	7.31358	1768.12	7.31358	98.1774
21TMS011	Spot 59	138.411	1.38814e+06	1.65647	9.10585	0.481729	4.69593	0.994989	0.314912	0.870597	0.874982	1764.83	13.4409	1766.51	8.32942	1768.49	8.79925	1768.49	8.79925	99.7933
21TMS011	Spot 87	271.72	3.40545e+06	2.16013	9.14383	0.456404	4.61905	0.976829	0.309589	0.863649	0.884136	1738.68	13.1615	1752.72	8.15356	1769.48	8.33562	1769.48	8.33562	98.2598
21TMS011	Spot 160	312.278	1.11593e+06	5.54189	9.14699	0.43237	4.70939	1.15321	0.315472	1.06909	0.927054	1767.58	16.5277	1768.91	9.6589	1770.47	7.89573	1770.47	7.89573	99.8368
21TMS011	Spot 282	195.563	1.31273e+06	3.43966	9.15639	0.453054	4.74444	0.85146	0.3178	0.72092	0.846687	1778.97	11.2075	1775.13	7.14067	1770.59	8.27332	1770.59	8.27332	100.474
21TMS011	Spot 264	249.638	1.1299e+06	4.13553	9.13255	0.439807	4.69441	0.907385	0.314367	0.793673	0.874682	1762.16	12.2371	1766.24	7.59559	1771.06	8.03092	1771.06	8.03092	99.4974
21TMS011	Spot 276	176.141	385179	2.3605	9.13309	0.540773	4.82993	0.932148	0.323222	0.759222	0.814487	1805.45	11.9552	1790.13	7.84153	1772.3	9.87205	1772.3	9.87205	101.87
21TMS011	Spot 291	530.638	337103	2.41356	9.1345	0.445774	3.82496	0.744798	0.255839	0.596662	0.801106	1468.52	7.83572	1598.01	5.99524	1773.23	8.13594	1773.23	8.13594	82.8158
21TMS011	Spot 39	37.6379	168983	4.97742	9.09453	0.701371	4.66686	1.14117	0.312087	0.900116	0.788768	1750.97	13.8016	1761.32	9.54277	1773.6	12.8031	1773.6	12.8031	98.7241
21TMS011	Spot 30	309.775	3.60324e+06	3.84828	9.09721	0.416443	4.64622	0.677887	0.310646	0.534888	0.789053	1743.89	8.17263	1757.61	5.66413	1773.96	7.59974	1773.96	7.59974	98.3048
21TMS011	Spot 75	258.366	491931	2.68581	9.07878	0.474699	4.71094	0.725633	0.314904	0.548819	0.756331	1764.79	8.47289	1769.19	6.07788	1774.36	8.66275	1774.36	8.66275	99.4608
21TMS011	Spot 206	205.095	5.44208e+06	1.82073	9.13148	0.504605	4.73219	0.963774	0.316178	0.821118	0.851981	1771.04	12.7157	1772.96	8.07897	1775.2	9.20763	1775.2	9.20763	99.7653
21TMS011	Spot 16	37.5091	671961	4.62633	9.10921	0.640521	4.84906	0.960611	0.323782	0.715893	0.745248	1808.17	11.2876	1793.45	8.08645	1776.36	11.6866	1776.36	11.6866	101.791
21TMS011	Spot 20	405.433	1.4057e+06	5.88826	9.10649	0.312465	4.58402	0.869859	0.306065	0.811801	0.933255	1721.32	12.2636	1746.37	7.2508	1776.48	5.7	1776.48	5.7	96.895
21TMS011	Spot 220	256.13	464067	3.71359	9.10468	0.473017	4.68719	0.736	0.312811	0.56387	0.766128	1754.53	8.66119	1764.95	6.15925	1777.3	8.62892	1777.3	8.62892	98.7184
21TMS011	Spot 304	270.432	899013	2.10863	9.1145	0.380877	4.64666	0.776183	0.310052	0.676306	0.871324	1740.96	10.3183	1757.69	6.48558	1777.63	6.94744	1777.63	6.94744	97.9375
21TMS011	Spot 252	347.606	819639	2.52429	9.104	0.493394	4.66784	0.943654	0.311399	0.80439	0.852421	1747.59	12.3131	1761.5	7.89132	1778.01	8.99993	1778.01	8.99993	98.2888
21TMS011	Spot 44	233.836	3.76112e+06	2.95283	9.07414	0.434664	4.75404	0.827627	0.317133	0.704297	0.850983	1775.71	10.9317	1776.82	6.94323	1778.11	7.9283	1778.11	7.9283	99.8654
21TMS011	Spot 163	312.888	516244	1.93668	9.09792	0.525486	4.69264	0.924723	0.312925	0.760903	0.822843	1755.08	11.6909	1765.93	7.74023	1778.76	9.58462	1778.76	9.58462	98.6689
21TMS011	Spot 121	167.235	3.60534e+06	3.39118	9.0976	0.379198	4.74332	0.753355	0.31629	0.650963	0.864085	1771.59	10.0834	1774.93	6.31764	1778.85	6.91572	1778.85	6.91572	99.5919
21TMS011	Spot 239	96.0144	293524	1.66561	9.10519	0.592314	4.82292	0.855219	0.321595	0.61686	0.721289	1797.51	9.67645	1788.9	7.19256	1778.86	10.8043	1778.86	10.8043	101.048
21TMS011	Spot 131	199.311	2.1297e+06	2.51454	9.08534	0.465457	4.74827	0.783715	0.316189	0.630523	0.80453	1771.09	9.76446	1775.8	6.57344	1781.33	8.48675	1781.33	8.48675	99.4255
21TMS011	Spot 60	253.807	257844	4.47	9.03826	0.457625	4.72868	1.50858	0.314875	1.4375	0.952879	1764.65	22.1912	1772.34	12.6447	1781.38	8.34392	1781.38	8.34392	99.061
21TMS011	Spot 120	459.59	768086	2.71938	9.07263	0.589776	4.77552	1.11021	0.317603	0.940601	0.847228	1778.01	14.6159	1780.6	9.32131	1783.62	10.751	1783.62	10.751	99.6855
21TMS011	Spot 19	345.918	1.99482e+06	7.91098	9.06418	0.391636	4.74368	0.994409	0.315246	0.914041	0.91918	1766.47	14.123	1774.99	8.33931	1785.01	7.13723	1785.01	7.13723	98.9611
21TMS011	Spot 313	359.895	710315	2.03863	9.0797	0.461573	4.44989	1.22335	0.295654	1.13293	0.926089	1669.72	16.6655	1721.68	10.1428	1785.43	8.41175	1785.43	8.41175	93.5194
21TMS011	Spot 245	273.58	654151	3.93295	9.06498	0.451706	4.60663	0.820245	0.305816	0.684658	0.834699	1720.08	10.3364	1750.47	6.84324	1786.93	8.23045	1786.93	8.23045	96.259
21TMS011	Spot 208	239.799	6.16319e+06	3.93328	9.06683	0.610907	4.70361	0.981917	0.312061	0.768736	0.782892	1750.84	11.7864	1767.88	8.22235	1788.06	11.1301	1788.06	11.1301	97.9186
21TMS011	Spot 288	355.061	2.33731e+06	4.23322	9.06023	0.38555	4.73587	1.00883	0.314144	0.932252	0.92409	1761.07	14.3661	1773.61	8.45784	1788.39	7.0252	1788.39	7.0252	98.472
21TMS011	Spot 263	435.226	5.48725e+06	1.98996	9.03264	0.339812	4.6918	0.863346	0.310727	0.793659	0.919282	1744.28	12.1288	1765.78	7.22623	1791.28	6.18957	1791.28	6.18957	97.3765
21TMS011	Spot 310	159.647	1.2698e+06	3.52664	9.05057	0.515937	4.69266	0.833499	0.310759	0.654622	0.78539	1744.44	10.0048	1765.93	6.97663	1791.42	9.3975	1791.42	9.3975	97.3774
21TMS011	Spot 294	595.705	755012	10.5544	9.04114	0.442487	4.47321	1.06171	0.296079	0.965105	0.909011	1671.84	14.2125	1726.01	8.81097	1792.34	8.05879	1792.34	8.05879	93.2769
21TMS011	Spot 284	400.035	739520	2.20613	9.03191	0.455023	4.68109	0.996688	0.309608	0.886758	0.889705	1738.78	13.5143	1763.87	8.339	1793.69	8.28568	1793.69	8.28568	96.9383
21TMS011	Spot 128	115.972	485827	55.5364	8.92274	0.500776	5.02428	0.798983	0.328955	0.622558	0.779189	1833.32	9.93402	1823.42	6.76616	1812.13	9.09661	1812.13	9.09661	101.169
21TMS011	Spot 90	102.798	725940	3.47335	8.87258	0.63794	4.96201	0.875358	0.322751	0.599402	0.68475	1803.15	9.42813	1812.87	7.39755	1824.05	11.5715	1824.05	11.5715	98.8541
21TMS011	Spot 17	89.1386	193267	2.9899	8.82768	0.568375	5.06538	1.046	0.327914	0.877966	0.839352	1828.26	13.9761	1830.33	8.8701	1832.66	10.3045	1832.66	10.3045	99.7604
21TMS011	Spot 292	139.526	790885	5.93075	8.82762	0.4783	5.20334	0.950481	0.336268	0.821365	0.864157	1868.69	13.3244	1853.16	8.09542	1835.77	8.66484	1835.77	8.66484	101.794
21TMS011	Spot 107	85.8556	218553	4.14161	8.76712	0.527436	5.22372	0.803417	0.335664	0.605993	0.754269	1865.78	9.81733	1856.49	6.84711	1846.1	9.54212	1846.1	9.54212	101.066
21TMS011	Spot 186	42.7167	138942	1.28316	8.75988	0.723546	5.13939	1.13046	0.329768	0.86857	0.768332	1837.26	13.8853	1842.64	9.60915	1848.71	13.0854	1848.71	13.0854	99.3805
21TMS011	Spot 41	43.8649	109086	3.0218	8.71809	0.726406	5.16651	1.05299	0.331374	0.761432	0.723115	1845.04	12.2171	1847.12	8.95824	1849.44	13.1525	1849.44	13.1525	99.7619
21TMS011	Spot 146	40.4402	165902	5.20905	8.72165	0.60155	5.09445	0.865123	0.326387	0.621638	0.718555	1820.84	9.86095	1835.18	7.34308	1851.47	10.8771	1851.47	10.8771	98.3461
21TMS011	Spot 98	190.864	306986	2.25471	8.73151	0.458662	5.10748	0.79552	0.327109	0.649983	0.817054	1824.35	10.3278	1837.35	6.75511	1852.09	8.29077	1852.09	8.29077	98.5022
21TMS011	Spot 272	169.328	1.65122e+06	1.32591	8.6762	0.389163	5.25523	0.711505	0.3342	0.595644	0.83716	1858.71	9.61813	1861.62	6.06962	1864.86	7.02524	1864.86	7.02524	99.67
21TMS011	Spot 308	46.2356	158172	4.06167	8.63313	0.573413	5.2508	0.875769	0.332066	0.661662	0.755521	1848.39	10.6329	1860.9	7.46994	1874.9	10.3447	1874.9	10.3447	98.5861
21TMS011	Spot 278	210.205	479994	2.67946	8.62252	0.377084	5.24028	0.781438	0.330795	0.684424	0.875853	1842.24	10.9671	1859.19	6.66317	1878.19	6.79659	1878.19	6.79659	98.0856
21TMS011	Spot 173	181.04	361913	16.9619	8.59064	0.505069	5.35645	0.871585	0.337575	0.710318	0.814973	1874.99	11.5564	1877.92	7.45779	1881.15	9.09993	1881.15	9.09993	99.673
21TMS011	Spot 297	97.2808	1.31417e+06	3.75972	8.59604	0.534353	5.28503	0.894637	0.33267	0.717525	0.802029	1851.31	11.5464	1866.45	7.6388	1883.33	9.62284	1883.33	9.62284	98.2999
21TMS011	Spot 258	385.863	1.3299e+06	10.2893	8.30574	1.317	5.41124	1.45897	0.329564	0.627772	0.430285	1836.27	10.0312	1886.64	12.5041	1942.52	23.5524	1942.52	23.5524	94.5304
21TMS011	Spot 209	127.127	667083	11.3668	8.24752	0.450675	5.9352	0.95221	0.358492	0.838805	0.880903	1975.02	14.2693	1966.4	8.27463	1957.33	8.04463	1957.33	8.04463	100.904
21TMS011	Spot 3	354.129	1.01774e+06	3.63596	8.0401	0.446511	5.94631	0.950648	0.351051	0.839261	0.88283	1939.62	14.0577	1968.03	8.26328	1998.01	7.93246	1998.01	7.93246	97.0772
21TMS011	Spot 280	126.943	1.16183e+06	2.04191	8.06619	0.679844	5.9262	0.987927	0.349694	0.716806	0.725566	1933.14	11.9722	1965.08	8.58314	1998.88	12.0777	1998.88	12.0777	96.7111
21TMS011	Spot 244	148.331	1.32138e+06	3.22122	6.21872	0.490459	10.3611	1.00785	0.471641	0.880466	0.873604	2490.75	18.1904	2467.58	9.33309	2448.53	8.29979	2448.53	8.29979	101.724
21TMS011	Spot 64	172.477	485673	3.18584	6.1447	0.860724	10.3061	1.46366	0.466979	1.18382	0.808812	2470.3	24.293	2462.65	13.548	2456.33	14.5515	2456.33	14.5515	100.569
21TMS011	Spot 18	218.898	1.27309e+06	1.89918	6.1016	0.395199	10.2977	0.826665	0.460514	0.72608	0.878325	2441.83	14.7584	2461.89	7.65099	2478.49	6.66769	2478.49	6.66769	98.5207
21TMS011	Spot 52	464.575	1.80395e+07	15.5698	5.96609	0.494876	10.6626	1.10832	0.468021	0.991696	0.894778	2474.87	20.3813	2494.17	10.2891	2509.91	8.32031	2509.91	8.32031	98.6042
21TMS011	Spot 69	226.622	1.86072e+06	3.02793	5.89506	0.404907	10.8082	0.737214	0.469538	0.616064	0.835665	2481.54	12.6892	2506.77	6.85172	2527.26	6.79836	2527.26	6.79836	98.1908
21TMS011	Spot 243	220.538	1.00072e+06	1.31239	5.89892	0.526328	11.0917	0.964654	0.478938	0.808416	0.838037	2522.64	16.8765	2530.86	8.98512	2537.44	8.82807	2537.44	8.82807	99.4166
21TMS011	Spot 126	176.688	817427	1.4256	5.8895	0.432613	11.0832	0.732027	0.478367	0.590516	0.806686	2520.15	12.3177	2530.15	6.81784	2538.17	7.25565	2538.17	7.25565	99.29
21TMS011	Spot 112	191.601	9.02819e+06	3.74045	5.89086	0.476229	11.0555	0.844156	0.476786	0.696997	0.825673	2513.25	14.5063	2527.82	7.86058	2539.52	7.98609	2539.52	7.98609	98.9656
21TMS011	Spot 43	246.428	823443	2.09569	5.81511	0.382732	11.0702	0.896004	0.473134	0.810147	0.904178	2497.29	16.7736	2529.06	8.34431	2554.62	6.40581	2554.62	6.40581	97.7557
21TMS011	Spot 95	408.978	1.65039e+06	2.16864	5.7006	0.402692	11.4713	0.840077	0.479927	0.737271	0.877623	2526.95	15.4128	2562.25	7.84619	2590.29	6.71638	2590.29	6.71638	97.5545
21TMS011	Spot 9	197.84	1.67354e+06	2.86729	5.66561	0.377463	11.5444	0.893953	0.479476	0.810354	0.906484	2524.98	16.9298	2568.18	8.35364	2602.44	6.28825	2602.44	6.28825	97.0237
21TMS011	Spot 271	93.1424	3.02503e+06	1.61623	5.64492	0.445233	12.4754	0.902942	0.516149	0.785539	0.869977	2682.83	17.2393	2640.87	8.48814	2608.86	7.41627	2608.86	7.41627	102.835
21TMS011	Spot 14	134.256	1.01762e+06	1.44161	5.63846	0.377535	11.972	0.766651	0.494755	0.667249	0.870342	2591.21	14.2373	2602.21	7.18447	2610.77	6.28745	2610.77	6.28745	99.2508
21TMS011	Spot 179	179.939	1.05935e+06	2.17701	5.6315	0.50214	11.887	1.11889	0.490046	0.999883	0.89364	2570.87	21.1985	2595.54	10.4798	2614.84	8.35932	2614.84	8.35932	98.3188
21TMS011	Spot 37	85.6718	341758	1.35543	5.52383	0.399947	12.5419	0.794908	0.509054	0.686963	0.864204	2652.59	14.9386	2645.87	7.47546	2640.73	6.63838	2640.73	6.63838	100.449
21TMS011	Spot 71	72.4248	2.95536e+06	0.989262	5.50897	0.566961	12.7845	1.00327	0.518123	0.827708	0.825012	2691.21	18.2105	2663.9	9.44826	2643.22	9.40963	2643.22	9.40963	101.816
21TMS011	Spot 175	167.898	562557	1.93718	5.52332	0.411425	12.1246	0.810101	0.490707	0.697848	0.861434	2573.74	14.8085	2614.09	7.59903	2645.48	6.82594	2645.48	6.82594	97.288
21TMS011	Spot 215	166.5	1.4218e+06	1.31726	5.5155	0.479564	12.7105	0.751933	0.513448	0.579156	0.770223	2671.33	12.6661	2658.44	7.07824	2648.63	7.95463	2648.63	7.95463	100.857
21TMS011	Spot 117	220.31	519075	3.10366	5.47305	0.343531	12.7955	0.706149	0.512942	0.616952	0.873685	2669.18	13.4839	2664.71	6.65047	2661.31	5.69364	2661.31	5.69364	100.296
21TMS011	Spot 49	100.017	1.45044e+06	1.10573	5.37984	0.431532	12.9182	0.81469	0.511411	0.691014	0.848192	2662.65	15.0728	2673.71	7.67803	2682.07	7.13461	2682.07	7.13461	99.2759
21TMS011	Spot 268	107.505	2.12949e+06	1.42089	5.39918	0.413613	13.0255	0.81288	0.5154	0.699785	0.860871	2679.64	15.3427	2681.5	7.66551	2682.9	6.8377	2682.9	6.8377	99.8787
21TMS011	Spot 166	43.076	1.11751e+06	1.99679	5.3639	0.520935	13.2214	0.939093	0.519699	0.781359	0.832036	2697.9	17.2252	2695.59	8.86512	2693.83	8.60422	2693.83	8.60422	100.151
21TMS011	Spot 214	85.0294	8.09305e+06	2.45179	5.3596	0.483417	12.9926	0.883132	0.509986	0.739074	0.836878	2656.57	16.0913	2679.12	8.32651	2696.16	7.98593	2696.16	7.98593	98.5317
21TMS011	Spot 187	92.45	326055	1.13892	5.34361	0.446295	13.3373	0.870165	0.521697	0.746991	0.858447	2706.37	16.5091	2703.83	8.21943	2701.91	7.36888	2701.91	7.36888	100.165
21TMS011	Spot 233	35.2192	242147	1.58119	5.31803	0.515486	13.3645	0.952748	0.520539	0.801242	0.84098	2701.47	17.6823	2705.76	9.00081	2708.95	8.50559	2708.95	8.50559	99.7238
21TMS011	Spot 190	126.685	854130	1.13425	5.05803	0.460724	14.5327	0.770094	0.538696	0.617072	0.801294	2777.99	13.9266	2785.14	7.31612	2790.32	7.54169	2790.32	7.54169	99.5581
21TMS011	Spot 315	137.801	720562	0.738252	4.91216	0.470041	15.2823	0.806435	0.54925	0.655284	0.81257	2822.05	14.976	2833	7.68565	2840.79	7.6629	2840.79	7.6629	99.3405
21TMS011	Spot 86	191.029	1.93092e+06	2.37193	4.86938	0.352265	15.1011	0.66228	0.539421	0.560824	0.846809	2781.02	12.6682	2821.63	6.3071	2850.77	5.7376	2850.77	5.7376	97.5534
21TMS011	Spot 77	54.0158	578163	1.92351	4.66504	0.4375	17.1681	0.718321	0.588768	0.569718	0.793124	2984.42	13.6101	2944.27	6.89236	2916.94	7.08425	2916.94	7.08425	102.314
21TMS011	Spot 83	79.634	357602	2.12935	4.60515	0.512019	17.0689	0.856567	0.576581	0.686687	0.801673	2934.79	16.1891	2938.71	8.21626	2941.39	8.26978	2941.39	8.26978	99.7755
21TMS011	Spot 93	71.2068	1.7123e+06	3.16095	3.54137	0.401149	24.6896	0.71494	0.641678	0.591792	0.827751	3195.61	14.9114	3296.02	6.97691	3357.66	6.26724	3357.66	6.26724	95.1737
